# Supplementary material for: A Deep Learning Model for Concrete Dam Deformation Prediction Based on RS-LSTM
Source: Hindawi journal article supplement (doi:10.1155/2019/4581672), 2019-10-31
Supplement: f1 [file 4581672.f1.xlsx]

## Sheet: Sheet1
Date	EX1	EX2	EX4	EX5	EX6	EX7	UH	DH	T	H-H0	(H-H0)2	(H-H0)3	T5	T20	T60	T90	D	ln(1+D)
2016-06-02 17:00:00	0	0	0	0	0	0	631.38	195.55	18.7515	0.57	0.3249	0.185193	9.0109	6.7609	4.39423	1.8609	30.7571	8.03162
2016-06-03 06:00:00	0.102991	0.124586	0.07989	0.143149	0.091224	0.099256	630.88	196.26	18.413	0.07	0.0049	0.000343	7.8612	6.6859	4.44009	1.97481	30.7625	8.03179	年平均气温	15.2891
2016-06-04 06:00:00	0.16637	0.216672	0.181084	0.262439	0.157108	0.161944	631.1	196.01	20.2185	0.29	0.0841	0.024389	6.7438	6.52347	4.46364	2.08495	30.7725	8.03212	始测日期	2008-01-01
2016-06-05 10:00:00	0.13204	0.105628	0.103857	0.153752	0.017738	0.099256	630.62	196.08	24.382	-0.19	0.0361	-0.006859	5.5875	6.16913	4.48395	2.2096	30.7842	8.0325	始测水位	630.81
2016-06-06 08:32:00	0.145244	0.130003	0.069238	0.151101	0.005068	0.112316	630.05	196.24	18.4115	-0.76	0.5776	-0.438976	5.2639	6.28005	4.55698	2.38051	30.7936	8.0328
2016-06-07 08:00:00	0.13204	0.411674	0.380809	-0.169658	-0.438382	-0.0653	630.56	196.23	22.608	-0.25	0.0625	-0.015625	4.7462	6.64915	4.54717	2.47953	30.8033	8.03312
2016-06-08 08:00:00	0.018486	0.273545	0.234344	-0.387031	-0.615762	-0.240304	630.82	195.95	23.0255	0.01	0.0001	1e-06	5.5175	6.74472	4.63231	2.62517	30.8133	8.03344
2016-06-09 08:00:00	0.071302	0.325005	0.250322	-0.365824	-0.57015	-0.18284	630.76	196.21	22.3575	-0.05	0.0025	-0.000125	6.44	7.02512	4.7494	2.77546	30.8233	8.03377
2016-06-10 08:00:00	-0.06602	0.13	0.103857	-0.567293	-0.752598	-0.3265	630.93	196.09	23.8325	0.12	0.0144	0.001728	6.8678	7.2764	4.88036	2.91832	30.8333	8.03409
2016-06-11 08:00:00	-0.150526	-0.035212	-0.114509	-0.787317	-0.932512	-0.4571	630.77	196.07	22.751	-0.04	0.0016	-6.4e-05	6.7579	7.36927	5.00257	3.07757	30.8433	8.03441
2016-06-12 08:00:00	-0.137322	-0.010837	-0.135813	-0.784666	-0.929978	-0.464936	631.1	196.21	22.9855	0.29	0.0841	0.024389	7.6258	7.5359	5.08175	3.21924	30.8533	8.03474
2016-06-13 08:00:00	-0.03433	0.11375	-0.101194	-0.710441	-0.856492	-0.360456	630.95	196.25	23.306	0.14	0.0196	0.002744	7.7013	7.57345	5.18151	3.36353	30.8633	8.03506
2016-06-14 08:00:00	0.058098	0.268128	0.07989	-0.516925	-0.701918	-0.258588	631.25	196.1	22.362	0.44	0.1936	0.085184	7.7574	7.59773	5.33661	3.50582	30.8733	8.03539
2016-06-15 08:00:00	0.052816	0.425216	-0.370157	-0.328712	-0.83622	0.15672	631.19	196.13	21.7335	0.38	0.1444	0.054872	7.7583	7.73803	5.42597	3.63762	30.8833	8.03571
2016-06-16 08:00:00	-0.116195	0.335838	-0.513959	-0.498369	-0.97559	0.062688	630.74	196.13	22.463	-0.07	0.0049	-0.000343	7.3385	7.70612	5.52987	3.76243	30.8933	8.03603
2016-06-17 08:00:00	0.007922	0.55251	-0.308908	-0.251836	-0.81088	0.227244	630.84	195.77	19.5005	0.03	0.0009	2.7e-05	7.2809	7.4178	5.67092	3.8898	30.9033	8.03636
2016-06-18 08:00:00	0.229749	0.953354	0.221029	0.262439	-0.415576	0.569416	631.89	197.21	20.237	1.08	1.1664	1.25971	6.5839	7.16595	5.72926	3.97869	30.9133	8.03668
2016-06-19 08:00:00	0.285206	1.05898	0.428743	0.434748	-0.301546	0.663448	632.46	196.28	21.411	1.65	2.7225	4.49213	5.9701	6.91598	5.77488	4.07577	30.9233	8.037
2016-06-20 08:00:00	0.118836	0.785433	0.202388	0.161705	-0.534674	0.449264	632.33	196.07	25.0455	1.52	2.3104	3.51181	5.7799	6.72783	5.86506	4.18034	30.9333	8.03733
2016-06-21 08:00:00	-0.040122	0.560636	-0.154454	-0.190865	-0.790608	0.271648	632.33	196.12	26.6625	1.52	2.3104	3.51181	6.4423	6.49837	5.95748	4.31973	30.9433	8.03765
2016-06-22 08:00:00	-0.077883	0.503759	-0.274289	-0.310155	-0.864094	0.232468	632.46	195.39	27.537	1.65	2.7225	4.49213	7.2822	6.73377	6.06852	4.46598	30.9533	8.03797
2016-06-23 08:00:00	-0.290292	0.13	-0.697706	-0.776714	-1.20872	-0.047016	632.05	196.26	26.0815	1.24	1.5376	1.90662	8.8895	7.17305	6.21081	4.61084	30.9633	8.0383
2016-06-24 08:00:00	-0.403577	-0.078547	-0.979984	-1.07096	-1.44438	-0.23508	632.02	196.06	25.83	1.21	1.4641	1.77156	10.0584	7.55647	6.3455	4.73397	30.9733	8.03862
2016-06-25 08:00:00	-0.488541	-0.246468	-1.20101	-1.30954	-1.64457	-0.397024	632.07	195.36	25.8235	1.26	1.5876	2.00038	10.9422	7.83705	6.46767	4.8543	30.9833	8.03894
2016-06-26 08:00:00	-0.561704	-0.400846	-1.32884	-1.44474	-1.80928	-0.53546	632.09	195.55	23.066	1.28	1.6384	2.09715	11.0978	7.90913	6.57306	4.97456	30.9933	8.03926
2016-06-27 08:00:00	-0.436619	-0.167924	-1.12911	-1.20616	-1.61162	-0.342172	632.43	195.64	24.4685	1.62	2.6244	4.25153	10.3785	8.14185	6.64916	5.06418	31.0033	8.03959
2016-06-28 06:00:00	-0.363455	-0.065005	-1.07053	-1.13989	-1.54827	-0.242916	632.54	196.28	21.4465	1.73	2.9929	5.17772	9.7648	8.23487	6.7653	5.16939	31.0125	8.03988
2016-06-29 06:00:00	-1.27209	-0.200425	-1.19302	-1.29364	-1.6623	-0.350008	632.24	196.26	22.133	1.43	2.0449	2.92421	8.8378	8.15592	6.80607	5.24102	31.0225	8.04021
2016-06-30 06:00:00	0.575865	-0.161608	-1.08518	-1.14924	-1.5741	-0.3213	631.94	195.77	21.2735	1.13	1.2769	1.4429	8.0984	8.1447	6.88329	5.30916	31.0325	8.04053
2016-07-01 06:00:00	0.929879	0.137112	-0.821968	-0.823891	-1.21084	0.107865	632.3	194.8	21.3955	1.49	2.2201	3.30795	7.1884	8.01675	6.84618	5.35109	31.0425	8.04085
2016-07-02 06:00:00	0.896838	0.04228	-0.972047	-0.997096	-1.39153	0	632.51	194.85	21.8525	1.7	2.89	4.913	6.8543	7.94897	6.87777	5.38326	31.0525	8.04117
2016-07-03 06:00:00	0.733991	-0.213766	-1.26759	-1.31776	-1.67376	-0.240975	632.14	196.03	22.417	1.33	1.7689	2.35264	6.3311	7.89232	6.89198	5.44829	31.0625	8.04149
2016-07-04 06:00:00	0.71511	-0.282519	-1.3484	-1.40904	-1.7523	-0.36261	632.32	195.83	22.094	1.51	2.2801	3.44295	6.5252	7.84787	6.92393	5.50848	31.0725	8.04182
2016-07-05 06:00:00	0.594745	-0.460329	-1.49617	-1.57054	-1.92409	-0.488835	632.09	196.25	21.95	1.28	1.6384	2.09715	6.5174	7.83447	6.93383	5.54286	31.0825	8.04214
2016-07-06 06:00:00	0.431898	-0.740084	-1.80556	-1.87482	-2.20633	-0.709155	631.59	196.16	21.936	0.78	0.6084	0.474552	6.6527	7.8453	6.92467	5.56452	31.0925	8.04246
2016-07-07 06:00:00	0.4791	-0.706892	-1.86097	-1.86546	-2.17688	-0.66096	631.55	196.3	22.3155	0.74	0.5476	0.405224	6.7608	7.81895	6.93193	5.59714	31.1025	8.04278
2016-07-08 06:00:00	0.519222	-0.67133	-1.81018	-1.81631	-2.15479	-0.631125	631.56	196.27	24.3925	0.75	0.5625	0.421875	6.8534	7.9597	6.97886	5.65065	31.1125	8.0431
2016-07-09 06:00:00	0.644307	-0.500633	-1.68319	-1.63608	-2.02717	-0.52326	631.91	196.28	22.957	1.1	1.21	1.331	7.2485	8.16747	7.02707	5.7439	31.1225	8.04342
2016-07-10 06:00:00	0.767033	-0.360756	-1.56774	-1.49096	-1.91673	-0.4131	631.08	196.28	22.8825	0.27	0.0729	0.019683	7.4211	8.24477	7.07635	5.83787	31.1325	8.04374
2016-07-11 06:00:00	0.762312	-0.422396	-1.6601	-1.57054	-1.99772	-0.44523	630.19	195.52	22.8905	-0.62	0.3844	-0.238328	7.6076	8.13662	7.11606	5.90878	31.1425	8.04406
2016-07-12 06:00:00	0.830755	-0.360756	-1.60007	-1.50969	-1.95845	-0.401625	629.97	196.16	22.7285	-0.84	0.7056	-0.592704	7.7985	7.94802	7.12257	5.96312	31.1525	8.04439
2016-07-13 06:00:00	0.918079	-0.292002	-1.51464	-1.43713	-1.91182	-0.36261	630.22	196.21	22.9955	-0.59	0.3481	-0.205379	7.8811	7.7076	7.13471	6.02677	31.1625	8.04471
2016-07-14 06:00:00	0.988882	-0.187687	-1.38072	-1.30605	-1.81611	-0.28917	630.57	196.25	21.658	-0.24	0.0576	-0.013824	7.6017	7.5533	7.09297	6.12672	31.1725	8.04503
2016-07-15 06:00:00	0.910999	-0.294373	-1.54004	-1.47926	-1.93391	-0.387855	630.45	196.28	21.948	-0.36	0.1296	-0.046656	7.3419	7.3447	7.15393	6.17848	31.1825	8.04535
2016-07-16 06:00:00	0.729271	-0.543307	-1.82634	-1.78822	-2.17933	-0.5508	630.27	196.16	22.03	-0.54	0.2916	-0.157464	7.155	7.15092	7.2364	6.25012	31.1925	8.04567
2016-07-17 06:00:00	0.693869	-0.576498	-1.84943	-1.82567	-2.21123	-0.576045	630.41	195.98	20.9035	-0.4	0.16	-0.064	6.9829	7.09912	7.32857	6.33934	31.2025	8.04599
2016-07-18 06:00:00	0.918079	-0.268294	-1.51233	-1.4699	-1.88728	-0.32589	630.51	195.33	21.348	-0.3	0.09	-0.027	6.6179	6.92088	7.39362	6.39383	31.2125	8.04631
2016-07-19 06:00:00	1.04788	-0.071518	-1.23757	-1.19839	-1.69094	-0.17901	631.06	195.57	21.264	0.25	0.0625	0.015625	6.2884	6.91595	7.44942	6.43658	31.2225	8.04663
2016-07-20 06:00:00	0.910999	-0.28489	-1.47539	-1.45819	-1.88973	-0.332775	631.15	195.34	22.554	0.34	0.1156	0.039304	6.2096	6.8725	7.46216	6.49507	31.2325	8.04695
2016-07-21 06:00:00	0.748152	-0.49352	-1.72013	-1.71098	-2.09834	-0.498015	630.91	195.72	21.4685	0.1	0.01	0.001	6.3308	6.93652	7.49639	6.52901	31.2425	8.04727
2016-07-22 06:00:00	0.615986	-0.690297	-1.89099	-1.89589	-2.26768	-0.635715	631.18	194.79	20.754	0.37	0.1369	0.050653	6.2185	6.94017	7.48753	6.54532	31.2525	8.04759
2016-07-23 06:00:00	0.528662	-0.830174	-2.0226	-2.04568	-2.39284	-0.73899	631.08	195.64	20.4965	0.27	0.0729	0.019683	6.1886	6.88525	7.45843	6.56481	31.2625	8.04791
2016-07-24 06:00:00	0.346935	-1.13838	-2.35046	-2.37805	-2.68735	-0.96849	630.75	194.8	23.6535	-0.06	0.0036	-0.000216	6.0183	6.78922	7.45837	6.59255	31.2725	8.04823
2016-07-25 06:00:00	0.394137	-1.10282	-2.36431	-2.39443	-2.71189	-0.96849	630.48	194.75	21.4235	-0.33	0.1089	-0.035937	6.4962	6.8672	7.46927	6.64981	31.2825	8.04855
2016-07-26 06:00:00	0.339854	-1.20239	-2.42435	-2.48572	-2.79042	-1.06029	630.81	195.05	23.8735	0	0	0	6.2701	6.84087	7.36799	6.67118	31.2925	8.04887
2016-07-27 06:00:00	0.311533	-1.24506	-2.50746	-2.52551	-2.85914	-1.0993	631.04	194.98	22.1215	0.23	0.0529	0.012167	6.7511	6.93775	7.30755	6.73089	31.3025	8.04919
2016-07-28 06:00:00	0.22185	-1.48214	-2.83302	-2.86958	-3.12665	-1.25077	629.19	194.7	22.6395	-1.62	2.6244	-4.25153	7.0246	6.92805	7.26791	6.78224	31.3125	8.04951
2016-07-29 06:00:00	0.24781	-1.50822	-3.05468	-3.03108	-3.23218	-1.29208	628.02	194.7	20.883	-2.79	7.7841	-21.7176	7.4532	6.8404	7.24523	6.82268	31.3225	8.04983
2016-07-30 06:00:00	0.302093	-1.42762	-2.99464	-2.97022	-3.17083	-1.20947	627.96	194.7	20.9925	-2.85	8.1225	-23.1491	6.8991	6.7367	7.15995	6.86027	31.3325	8.05015
2016-07-31 06:00:00	0.311533	-1.45606	-3.06853	-3.04512	-3.21009	-1.237	627.68	194.7	21.9105	-3.13	9.7969	-30.6643	6.8129	6.6422	7.07649	6.83241	31.3425	8.05046
2016-08-01 06:00:00	0.377616	-1.3802	-3.01311	-3.00299	-3.17573	-1.20258	627.46	194.7	21.811	-3.35	11.2225	-37.5954	6.4203	6.5932	7.09167	6.85919	31.3525	8.05078
2016-08-02 06:00:00	0.575865	-1.07437	-2.63676	-2.62615	-2.87387	-0.96849	628.69	194.7	23.3355	-2.12	4.4944	-9.52813	6.3582	6.54732	7.14266	6.8682	31.3625	8.0511
2016-08-03 06:00:00	0.623066	-1.00324	-2.52825	-2.54189	-2.80515	-0.938655	629.31	194.7	22.399	-1.5	2.25	-3.375	6.4974	6.56432	7.2247	6.89971	31.3725	8.05142
2016-08-04 06:00:00	0.667908	-0.903669	-2.39895	-2.39677	-2.70453	-0.856035	629.88	194.7	22.173	-0.93	0.8649	-0.804357	6.8006	6.60138	7.26104	6.90969	31.3825	8.05174
2016-08-05 06:00:00	0.646667	-0.929748	-2.39202	-2.38273	-2.71434	-0.85833	629.71	194.7	21.8355	-1.1	1.21	-1.331	7.0367	6.61262	7.22422	6.90606	31.3925	8.05206
2016-08-06 06:00:00	0.729271	-0.820691	-2.24425	-2.24229	-2.60145	-0.764235	629.89	194.7	21.9385	-0.92	0.8464	-0.778688	7.0217	6.6029	7.28129	6.90979	31.4025	8.05238
2016-08-07 06:00:00	0.684429	-0.872848	-2.30197	-2.31017	-2.67017	-0.828495	630.11	194.7	22.488	-0.7	0.49	-0.343	7.0472	6.65465	7.27013	6.93688	31.4125	8.05269
2016-08-08 06:00:00	0.752872	-0.780387	-2.18653	-2.1908	-2.55973	-0.755055	630.49	194.7	22.9055	-0.32	0.1024	-0.032768	6.8777	6.71165	7.26117	6.94786	31.4225	8.05301
2016-08-09 06:00:00	0.693869	-0.823062	-2.205	-2.23995	-2.59654	-0.79407	630.76	194.7	22.9055	-0.05	0.0025	-0.000125	6.979	6.79372	7.27031	6.98014	31.4325	8.05333
2016-08-10 06:00:00	0.769393	-0.725859	-2.1011	-2.1159	-2.51065	-0.722925	630.77	194.7	22.937	-0.04	0.0016	-6.4e-05	7.1255	6.8113	7.25486	7.00687	31.4425	8.05365
2016-08-11 06:00:00	0.828395	-0.645252	-2.00643	-2.01994	-2.4272	-0.64719	630.8	194.7	23.726	-0.01	0.0001	-1e-06	7.3458	6.88472	7.25796	7.01173	31.4525	8.05397
2016-08-12 06:00:00	0.970001	-0.424767	-1.74553	-1.75077	-2.2235	-0.488835	631.4	194.7	23.2025	0.59	0.3481	0.205379	7.7033	7.03332	7.2703	7.03091	31.4625	8.05428
2016-08-13 06:00:00	1.06676	-0.28489	-1.54235	-1.53309	-2.06398	-0.374085	631.67	194.7	23.031	0.86	0.7396	0.636056	7.8462	7.16862	7.26857	7.00538	31.4725	8.0546
2016-08-14 06:00:00	1.11397	-0.220878	-1.44768	-1.42542	-1.99527	-0.341955	631.96	194.7	22.968	1.15	1.3225	1.52088	7.8713	7.1375	7.27972	7.06128	31.4825	8.05492
2016-08-15 06:00:00	1.13049	-0.1948	-1.38996	-1.38798	-1.97318	-0.314415	631.97	194.7	23.104	1.16	1.3456	1.5609	7.8838	7.21472	7.3003	7.12759	31.4925	8.05524
2016-08-16 06:00:00	1.12105	-0.201912	-1.3761	-1.37861	-1.98545	-0.3213	631.75	194.7	22.116	0.94	0.8836	0.830584	7.9172	7.17625	7.31098	7.20097	31.5025	8.05555
2016-08-17 06:00:00	1.07149	-0.292002	-1.51002	-1.52139	-2.08362	-0.40851	631.41	194.7	21.972	0.6	0.36	0.216	7.5952	7.17597	7.35457	7.25781	31.5125	8.05587
2016-08-18 06:00:00	1.08329	-0.263553	-1.49848	-1.50266	-2.06398	-0.369495	631.26	194.7	21.601	0.45	0.2025	0.091125	7.3491	7.1426	7.38349	7.30194	31.5225	8.05619
2016-08-19 06:00:00	1.02664	-0.34416	-1.56774	-1.59395	-2.14006	-0.44064	631.2	194.7	22.845	0.39	0.1521	0.059319	7.0631	7.1785	7.38666	7.31418	31.5325	8.05651
2016-08-20 06:00:00	0.847276	-0.604948	-1.80556	-1.84673	-2.40757	-0.65637	630.87	194.7	21.669	0.06	0.0036	0.000216	7.0385	7.27112	7.34998	7.34023	31.5425	8.05682
2016-08-21 06:00:00	0.818955	-0.649993	-1.87714	-1.91461	-2.46402	-0.6885	630.67	194.7	22.484	-0.14	0.0196	-0.002744	6.7515	7.25905	7.26676	7.33656	31.5525	8.05714
2016-08-22 06:00:00	0.752872	-0.761421	-2.00182	-2.08079	-2.56464	-0.787185	630.79	194.7	23.3865	-0.02	0.0004	-8e-06	6.8251	7.2927	7.18254	7.33638	31.5625	8.05746
2016-08-23 06:00:00	0.637227	-0.939231	-2.205	-2.28443	-2.75852	-0.920295	630.57	194.7	23.7735	-0.24	0.0576	-0.013824	7.108	7.29525	7.13762	7.36845	31.5725	8.05777
2016-08-24 06:00:00	0.627787	-0.986647	-2.3089	-2.38741	-2.81988	-0.95472	629.93	195.2	23.409	-0.88	0.7744	-0.681472	7.5425	7.36397	7.10335	7.37704	31.5825	8.05809
2016-08-25 06:00:00	0.533383	-1.14075	-2.50054	-2.57232	-2.98922	-1.07635	629.56	194.7	21.515	-1.25	1.5625	-1.95312	7.6553	7.42577	7.06311	7.33159	31.5925	8.05841
2016-08-26 06:00:00	0.512142	-1.20002	-2.57442	-2.63083	-3.05057	-1.12226	629.51	194.7	22.9685	-1.3	1.69	-2.197	7.6245	7.40975	7.03726	7.26509	31.6025	8.05872
2016-08-27 06:00:00	0.571144	-1.12415	-2.55133	-2.61913	-3.01621	-1.09242	629.91	194.7	22.2155	-0.9	0.81	-0.729	7.7214	7.46125	7.01226	7.24807	31.6125	8.05904
2016-08-28 06:00:00	0.639587	-1.01273	-2.44512	-2.45997	-2.8935	-1.00521	630.15	195.24	21.3485	-0.66	0.4356	-0.287496	7.48719	7.44762	7.02507	7.22824	31.6225	8.05936
2016-08-29 06:00:00	0.880317	-0.657106	-1.9718	-1.97313	-2.53028	-0.72522	630.31	195.32	14.4015	-0.5	0.25	-0.125	7.0022	7.36977	7.012	7.17656	31.6325	8.05967
2016-08-30 06:00:00	0.868517	-0.654735	-1.90946	-1.88184	-2.50328	-0.699975	630.38	194.74	15.6605	-0.43	0.1849	-0.079507	5.2007	6.94458	6.89747	7.04769	31.6425	8.05999
2016-08-31 06:00:00	0.69623	-0.941602	-2.19807	-2.1276	-2.70453	-0.85833	630.47	194.71	16.559	-0.34	0.1156	-0.039304	4.0298	6.58075	6.80188	6.98836	31.6525	8.0603
2016-09-01 06:00:00	0.736351	-0.875219	-2.03876	-1.97547	-2.61372	-0.78489	630.6	194.7	19.6835	-0.21	0.0441	-0.009261	2.7479	6.2224	6.71366	6.964	31.6625	8.06062
2016-09-02 06:00:00	0.868517	-0.711634	-1.83558	-1.75311	-2.40512	-0.61965	630.86	194.77	21.057	0.05	0.0025	0.000125	2.24151	6.04645	6.6681	6.97812	31.6725	8.06093
2016-09-03 06:00:00	0.977081	-0.559903	-1.63701	-1.54714	-2.27013	-0.520965	631.02	194.7	20.313	0.21	0.0441	0.009261	2.18321	5.94775	6.65082	6.98743	31.6825	8.06125
2016-09-04 06:00:00	1.05496	-0.382093	-1.45692	-1.35053	-2.14743	-0.44523	631.39	194.7	19.153	0.58	0.3364	0.195112	3.36551	5.815	6.62353	6.94222	31.6925	8.06157
2016-09-05 06:00:00	0.984162	-0.443734	-1.45922	-1.38095	-2.21123	-0.50949	631.57	194.92	19.117	0.76	0.5776	0.438976	4.064	5.61745	6.57715	6.95046	31.7025	8.06188
2016-09-06 06:00:00	1.0054	-0.420026	-1.43614	-1.35053	-2.17197	-0.465885	631.99	194.7	21.6525	1.18	1.3924	1.64303	4.5756	5.4675	6.52384	6.91167	31.7125	8.0622
2016-09-07 06:00:00	0.972361	-0.460329	-1.47539	-1.38798	-2.23578	-0.51408	631.86	194.7	21.024	1.05	1.1025	1.15763	4.9694	5.45153	6.47817	6.89642	31.7225	8.06251
2016-09-08 06:00:00	0.993602	-0.460329	-1.48693	-1.43011	-2.23578	-0.52326	631.71	194.7	21.6055	0.9	0.81	0.729	4.9628	5.42268	6.44596	6.8816	31.7325	8.06283
2016-09-09 06:00:00	1.11633	-0.287261	-1.31146	-1.18902	-2.04189	-0.355725	631.86	194.7	19.3805	1.05	1.1025	1.15763	5.2213	5.3607	6.42467	6.85686	31.7425	8.06314
2016-09-10 06:00:00	1.20365	-0.161608	-1.14752	-1.03689	-1.93391	-0.286875	631.79	194.7	19.5195	0.98	0.9604	0.941192	5.2668	5.24628	6.36617	6.81941	31.7525	8.06346
2016-09-11 06:00:00	1.23197	-0.116563	-1.10827	-0.994755	-1.89955	-0.25245	631.76	194.7	21.1425	0.95	0.9025	0.857375	5.3473	5.09805	6.31269	6.78089	31.7625	8.06377
2016-09-12 06:00:00	1.39718	0.111034	-0.812733	-0.657709	-1.61486	-0.034425	632.26	195.37	18.6135	1.45	2.1025	3.04863	5.2453	4.98585	6.28181	6.75686	31.7725	8.06409
2016-09-13 06:00:00	1.44438	0.177416	-0.694979	-0.554722	-1.56823	0.01377	631.9	194.7	19.7635	1.09	1.1881	1.29503	4.7632	4.72785	6.23107	6.71521	31.7825	8.0644
2016-09-14 06:00:00	1.45382	0.167933	-0.724995	-0.594512	-1.62959	-0.016065	630.91	194.93	20.8675	0.1	0.01	0.001	4.3948	4.54558	6.19466	6.69332	31.7925	8.06472
2016-09-15 06:00:00	1.44438	0.132371	-0.77579	-0.650687	-1.69831	-0.061965	630.21	195.48	22.179	-0.6	0.36	-0.216	4.6922	4.5132	6.17528	6.67559	31.8025	8.06503
2016-09-16 06:00:00	1.52226	0.222461	-0.593387	-0.43067	-1.50442	0.06885	631.15	195.41	20.7125	0.34	0.1156	0.039304	5.2241	4.47373	6.19654	6.70535	31.8125	8.06534
2016-09-17 06:00:00	1.52226	0.196382	-0.579534	-0.42833	-1.5216	0.057375	631.04	195.21	21.099	0.23	0.0529	0.012167	5.1381	4.39858	6.18595	6.71063	31.8225	8.06566
2016-09-18 06:00:00	1.45854	0.106292	-0.706523	-0.568766	-1.68113	-0.05967	629.97	194.74	21.9915	-0.84	0.7056	-0.592704	5.6352	4.3861	6.1832	6.70717	31.8325	8.06597
2016-09-19 06:00:00	1.43494	0.054134	-0.791953	-0.667071	-1.7523	-0.098685	629.09	194.7	15.8025	-1.72	2.9584	-5.08845	6.0808	4.7656	6.17382	6.67323	31.8425	8.06629
2016-09-20 06:00:00	1.27445	-0.1948	-1.02053	-0.873044	-1.93391	-0.23409	628.78	195.14	14.4175	-2.03	4.1209	-8.36543	5.0678	4.7727	6.07939	6.55257	31.8525	8.0666
2016-09-21 06:00:00	1.20601	-0.292002	-1.10135	-0.947943	-1.99772	-0.282285	628.69	194.7	16.1325	-2.12	4.4944	-9.52813	3.5155	4.66563	5.97378	6.40679	31.8625	8.06691
2016-09-22 06:00:00	1.21073	-0.287261	-1.05978	-0.89645	-1.98299	-0.273105	628.77	194.7	16.041	-2.04	4.1616	-8.48966	2.5995	4.48808	5.90105	6.29625	31.8725	8.06723
2016-09-23 06:00:00	1.13049	-0.401059	-1.14521	-1.00178	-2.11307	-0.378675	628.63	194.7	16.0095	-2.18	4.7524	-10.3602	1.5879	4.23728	5.77418	6.18748	31.8825	8.06754
2016-09-24 06:00:00	0.991242	-0.583611	-1.29991	-1.1703	-2.26032	-0.50949	628.72	194.7	17.1655	-2.09	4.3681	-9.12933	0.391503	4.0221	5.68394	6.07844	31.8925	8.06785
2016-09-25 06:00:00	0.892118	-0.754308	-1.44075	-1.30839	-2.39284	-0.61965	628.65	194.7	18.0355	-2.16	4.6656	-10.0777	0.664101	3.92273	5.57214	6.01288	31.9025	8.06817
2016-09-26 06:00:00	0.840196	-0.825432	-1.51233	-1.39032	-2.47138	-0.695385	628.91	194.7	17.962	-1.9	3.61	-6.859	1.3877	3.86865	5.50404	5.9414	31.9125	8.06848
2016-09-27 06:00:00	0.70095	-1.08148	-1.79632	-1.71566	-2.71925	-0.90882	628.81	194.7	22.652	-2	4	-8	1.7536	3.68413	5.42608	5.90268	31.9225	8.06879
2016-09-28 06:00:00	0.781193	-0.977164	-1.81018	-1.67821	-2.62354	-0.79407	629.28	199.21	23.14	-1.53	2.3409	-3.58158	3.0758	3.76553	5.45557	5.90845	31.9325	8.06911
2016-09-29 06:00:00	1.11161	-0.438992	-1.19139	-1.05093	-2.10325	-0.39933	629.96	195.99	22.926	-0.85	0.7225	-0.614125	4.5019	3.84225	5.49136	5.92919	31.9425	8.06942
2016-09-30 06:00:00	1.17533	-0.382093	-1.1406	-1.01582	-2.04926	-0.364905	629.98	195.43	22.213	-0.83	0.6889	-0.571787	5.654	4.01953	5.50828	5.94619	31.9525	8.06973
2016-10-01 06:00:00	1.19185	-0.363126	-1.11289	-1.0088	-2.05171	-0.34884	629.62	194.86	21.8885	-1.19	1.4161	-1.68516	6.4895	4.1542	5.51498	5.9502	31.9625	8.07005
2016-10-02 06:00:00	1.22253	-0.31571	-1.06671	-0.926878	-1.99527	-0.314415	629.69	194.97	20.525	-1.12	1.2544	-1.40493	7.2748	4.1915	5.49087	5.94433	31.9725	8.07036
2016-10-03 06:00:00	1.21545	-0.337048	-1.08287	-0.957305	-2.04189	-0.346545	629.51	194.7	20.914	-1.3	1.69	-2.197	6.8494	4.28708	5.45963	5.92689	31.9825	8.07067
2016-10-04 06:00:00	1.17061	-0.417655	-1.2191	-1.10944	-2.1597	-0.415395	628.98	194.86	20.6115	-1.83	3.3489	-6.12849	6.4042	4.3446	5.43865	5.91538	31.9925	8.07098
2016-10-05 06:00:00	1.06676	-0.595465	-1.4269	-1.35989	-2.34376	-0.557685	628.28	194.72	20.2525	-2.53	6.4009	-16.1943	5.9413	4.3318	5.41825	5.90067	32.0025	8.0713
2016-10-06 06:00:00	1.0408	-0.626285	-1.51464	-1.42777	-2.37076	-0.571455	628.15	194.71	21.1565	-2.66	7.0756	-18.8211	5.5492	4.23548	5.39015	5.87774	32.0125	8.07161
2016-10-07 06:00:00	1.12577	-0.533824	-1.46846	-1.35287	-2.29958	-0.48654	627.56	195.61	20.051	-3.25	10.5625	-34.3281	5.4028	4.25768	5.36796	5.84179	32.0225	8.07192
2016-10-08 06:00:00	1.17061	-0.503004	-1.44075	-1.31542	-2.25786	-0.452115	627.29	195.05	21.327	-3.52	12.3904	-43.6142	5.308	4.20528	5.32038	5.8095	32.0325	8.07223
2016-10-09 06:00:00	1.18241	-0.500633	-1.38765	-1.24988	-2.2235	-0.41769	627.41	194.79	17.468	-3.4	11.56	-39.304	5.3906	4.17205	5.29408	5.79222	32.0425	8.07255
2016-10-10 06:00:00	1.35706	-0.178204	-0.94434	-0.807507	-1.93145	-0.218025	628.13	194.7	15.4145	-2.68	7.1824	-19.2488	4.7619	4.25533	5.20293	5.73197	32.0525	8.07286
2016-10-11 06:00:00	1.48922	0.028056	-0.607241	-0.444714	-1.6934	-0.0459	628.87	194.7	15.815	-1.94	3.7636	-7.30138	3.7943	4.30518	5.0644	5.6507	32.0625	8.07317
2016-10-12 06:00:00	1.59779	0.172674	-0.302466	-0.121711	-1.47497	0.11016	629.46	195.6	15.5115	-1.35	1.8225	-2.46037	2.726	4.2893	4.94128	5.57092	32.0725	8.07348
2016-10-13 06:00:00	1.74175	0.393159	0.064649	0.248104	-1.23446	0.291465	629.91	195.59	14.8365	-0.9	0.81	-0.729	1.8181	4.26283	4.81595	5.50262	32.0825	8.07379
2016-10-14 06:00:00	1.8102	0.537778	0.233199	0.411946	-1.11912	0.37638	630.43	195.57	14.001	-0.38	0.1444	-0.054872	0.520001	4.20418	4.68043	5.42361	32.0925	8.0741
2016-10-15 06:00:00	1.89988	0.706104	0.443309	0.608556	-0.996405	0.475065	630.66	195.4	17.4555	-0.15	0.0225	-0.003375	-0.173401	4.04595	4.52871	5.33439	32.1025	8.07442
2016-10-16 06:00:00	1.93764	0.75352	0.489487	0.655368	-0.927688	0.53703	631.33	195.62	19.696	0.52	0.2704	0.140608	0.234799	4.01695	4.45103	5.29608	32.1125	8.07473
2016-10-17 06:00:00	1.94944	0.765374	0.487178	0.653027	-0.910508	0.54621	631.55	195.57	20.2255	0.74	0.5476	0.405224	1.011	4.10365	4.4131	5.27773	32.1225	8.07504
2016-10-18 06:00:00	1.97776	0.817532	0.535665	0.718564	-0.854062	0.59211	631.83	195.6	18.6545	1.02	1.0404	1.06121	1.9538	3.98232	4.39018	5.26619	32.1325	8.07535
2016-10-19 06:00:00	2.05093	0.909993	0.658036	0.837935	-0.748531	0.672435	632.16	195.63	19.319	1.35	1.8225	2.46038	2.7174	3.75805	4.32033	5.22286	32.1425	8.07566
2016-10-20 06:00:00	2.09577	0.976376	0.727304	0.912834	-0.665088	0.736695	632.3	195.82	21.023	1.49	2.2201	3.30795	3.781	3.5777	4.28117	5.19898	32.1525	8.07597
2016-10-21 06:00:00	2.10285	0.971634	0.706523	0.868363	-0.701901	0.713745	632.04	195.83	22.172	1.23	1.5129	1.86087	4.4945	3.5182	4.25682	5.20197	32.1625	8.07628
2016-10-22 06:00:00	2.03441	0.883914	0.574916	0.725586	-0.800069	0.64719	631.83	195.8	21.722	1.02	1.0404	1.06121	4.9897	3.53237	4.23658	5.22058	32.1725	8.07659
2016-10-23 06:00:00	2.06509	0.905252	0.581843	0.748992	-0.76571	0.67932	632.14	195.61	20.8235	1.33	1.7689	2.35264	5.289	3.59222	4.20238	5.19912	32.1825	8.0769
2016-10-24 06:00:00	2.07217	0.952668	0.616476	0.788782	-0.73626	0.704565	632.09	195.79	18.356	1.28	1.6384	2.09715	5.7228	3.5877	4.15929	5.19246	32.1925	8.07721
2016-10-25 06:00:00	2.10521	0.964522	0.67189	0.863681	-0.667542	0.768825	632.07	195.82	19.2715	1.26	1.5876	2.00038	5.5302	3.47492	4.10664	5.13115	32.2025	8.07752
2016-10-26 06:00:00	2.08869	0.945555	0.639565	0.812188	-0.696993	0.736695	632.04	195.83	20.796	1.23	1.5129	1.86087	5.1799	3.42587	4.04503	5.09948	32.2125	8.07784
2016-10-27 06:00:00	2.04385	0.947926	0.526429	0.671752	-0.814794	0.640305	631.92	195.83	19.0085	1.11	1.2321	1.36763	4.9047	3.40785	4.02137	5.079	32.2225	8.07815
2016-10-28 06:00:00	1.8692	0.741666	0.288613	0.421308	-1.02586	0.470475	631.96	195.81	21.0755	1.15	1.3225	1.52088	4.362	3.35572	3.98237	5.05817	32.2325	8.07846
2016-10-29 06:00:00	1.66623	0.45717	-0.055414	0.058515	-1.28845	0.240975	631.27	195.62	18.47	0.46	0.2116	0.097336	4.4124	3.34315	4.0936	5.05909	32.2425	8.07877
2016-10-30 06:00:00	1.7984	0.630239	0.140843	0.306619	-1.10194	0.41769	630.73	195.59	13.423	-0.08	0.0064	-0.000512	4.4352	3.39325	4.14043	5.02087	32.2525	8.07908
2016-10-31 06:00:00	1.94708	0.81279	0.445618	0.596853	-0.930142	0.54162	630.01	195.67	14.6255	-0.8	0.64	-0.512	3.2655	3.29367	4.08816	4.92767	32.2625	8.07939
2016-11-01 06:00:00	1.8574	0.63498	0.307084	0.458758	-1.07003	0.442935	629.44	195.82	13.87	-1.37	1.8769	-2.57135	2.0314	3.2342	4.00386	4.83089	32.2725	8.0797
2016-11-02 06:00:00	1.89516	0.696621	0.464089	0.634303	-0.993951	0.507195	629.01	195.66	12.116	-1.8	3.24	-5.832	1.0037	3.15212	3.88408	4.73612	32.2825	8.08001
2016-11-03 06:00:00	1.96832	0.786712	0.690361	0.875384	-0.856516	0.612765	629.07	195.64	11.4535	-1.74	3.0276	-5.26802	-0.788199	3.0161	3.74746	4.62438	32.2925	8.08031
2016-11-04 06:00:00	1.99192	0.805678	0.838131	1.01582	-0.841791	0.626535	628.69	195.65	9.85	-2.12	4.4944	-9.52813	-2.1915	2.88872	3.61913	4.50902	32.3025	8.08062
2016-11-05 06:00:00	1.999	0.81279	0.925869	1.10944	-0.827065	0.626535	628.71	195.62	10.6565	-2.1	4.41	-9.261	-2.9061	2.50845	3.46468	4.37471	32.3125	8.08093
2016-11-06 06:00:00	1.88572	0.625497	0.750392	0.912834	-1.00131	0.475065	628.76	195.67	15.8615	-2.05	4.2025	-8.61512	-3.6999	2.05648	3.28142	4.24324	32.3225	8.08124
2016-11-07 06:00:00	1.80784	0.511699	0.60955	0.784101	-1.1093	0.392445	628.75	195.62	17.011	-2.06	4.2436	-8.74182	-3.3016	1.83828	3.19538	4.16498	32.3325	8.08155
2016-11-08 06:00:00	1.83144	0.552002	0.623403	0.812188	-1.06758	0.419985	628.75	195.65	16.3365	-2.06	4.2436	-8.74182	-2.3226	1.7561	3.1188	4.09948	32.3425	8.08186
2016-11-09 06:00:00	1.94472	0.710846	0.90278	1.09774	-0.876149	0.576045	628.72	195.68	8.69001	-2.09	4.3681	-9.12933	-1.346	1.60698	3.06807	4.02614	32.3525	8.08217
2016-11-10 06:00:00	2.11465	0.917105	1.34609	1.5448	-0.625821	0.79866	628.62	195.7	9.738	-2.19	4.7961	-10.5035	-1.578	0.990327	2.88758	3.85908	32.3625	8.08248
2016-11-11 06:00:00	2.19725	1.02142	1.59776	1.79056	-0.512928	0.888165	628.5	195.61	4.66701	-2.31	5.3361	-12.3264	-1.7617	0.368626	2.6975	3.70947	32.3725	8.08279
2016-11-12 06:00:00	2.17365	0.966892	1.57929	1.73673	-0.574283	0.83079	628.12	195.82	11.3465	-2.69	7.2361	-19.4651	-4.0006	-0.484124	2.46506	3.50543	32.3825	8.0831
2016-11-13 06:00:00	2.18309	0.95978	1.57236	1.73673	-0.562012	0.846855	627.88	195.75	15.2025	-2.93	8.5849	-25.1538	-5.1335	-0.957974	2.32478	3.3763	32.3925	8.08341
2016-11-14 06:00:00	2.13825	0.879173	1.3738	1.51905	-0.682268	0.75735	627.62	195.82	17.8415	-3.19	10.1761	-32.4618	-5.3603	-1.11565	2.23036	3.28851	32.4025	8.08371
2016-11-15 06:00:00	2.09813	0.829386	1.24681	1.4067	-0.733806	0.71145	627.48	195.84	15.4045	-3.33	11.0889	-36.926	-3.53	-1.18715	2.15807	3.24101	32.4125	8.08402
2016-11-16 06:00:00	2.10993	0.845982	1.29068	1.45351	-0.699447	0.745875	627.27	194.7	13.7585	-3.54	12.5316	-44.3619	-2.3967	-1.45672	2.0696	3.16804	32.4225	8.08433
2016-11-17 06:00:00	2.13589	0.864948	1.34609	1.51905	-0.638092	0.78948	627.76	194.7	15.356	-3.05	9.3025	-28.3726	-0.578399	-1.71922	1.94726	3.0809	32.4325	8.08464
2016-11-18 06:00:00	2.10757	0.867319	1.25142	1.42308	-0.674905	0.74817	628.24	194.7	16.2385	-2.57	6.6049	-16.9746	0.2235	-2.0052	1.83667	2.99769	32.4425	8.08495
2016-11-19 06:00:00	2.10285	0.881544	1.21679	1.38329	-0.665088	0.736695	628.73	194.7	15.461	-2.08	4.3264	-8.99891	0.430699	-2.11677	1.84393	2.93735	32.4525	8.08526
2016-11-20 06:00:00	2.04385	0.822274	1.12213	1.27797	-0.70681	0.70686	629.29	194.92	17.5435	-1.52	2.3104	-3.51181	-0.0454018	-2.01487	1.86133	2.85932	32.4625	8.08556
2016-11-21 06:00:00	2.10049	0.912364	1.22372	1.39734	-0.576737	0.80325	629.88	194.79	16.978	-0.93	0.8649	-0.804357	0.382397	-1.86897	1.88484	2.79439	32.4725	8.08587
2016-11-22 06:00:00	2.13825	0.933701	1.26066	1.43713	-0.515382	0.851445	629.99	194.7	15.008	-0.82	0.6724	-0.551368	1.0263	-1.71357	1.90046	2.71889	32.4825	8.08618
2016-11-23 06:00:00	2.22085	1.12574	1.48231	1.67353	-0.365676	0.966195	630.07	194.7	12.2665	-0.74	0.5476	-0.405224	0.9567	-1.56897	1.88377	2.62555	32.4925	8.08649
2016-11-24 06:00:00	2.34358	1.28932	1.82172	2.0293	-0.164431	1.14979	630.14	194.7	8.2365	-0.67	0.4489	-0.300763	0.162301	-1.52832	1.80212	2.52278	32.5025	8.08679
2016-11-25 06:00:00	2.46631	1.42683	2.16806	2.39443	0.049084	1.32421	630.22	194.7	8.30449	-0.59	0.3481	-0.205379	-1.2826	-1.609	1.6388	2.3591	32.5125	8.0871
2016-11-26 06:00:00	2.52295	1.48373	2.34815	2.58168	0.159523	1.41372	630.36	194.7	12.33	-0.45	0.2025	-0.091125	-3.1304	-1.7266	1.47784	2.20453	32.5225	8.08741
2016-11-27 06:00:00	2.60319	1.63546	2.62753	2.8766	0.343588	1.56289	631	195.61	9.1195	0.19	0.0361	0.006859	-4.06	-1.90317	1.30581	2.10432	32.5325	8.08772
2016-11-28 06:00:00	2.77548	1.91047	3.01773	3.23705	0.596371	1.76944	631.94	194.78	2.429	1.13	1.2769	1.4429	-5.2377	-2.29775	1.07213	2.04563	32.5425	8.08802
2016-11-29 06:00:00	2.93124	2.14281	3.25555	3.49686	0.822157	1.94616	632.44	195.28	7.4195	1.63	2.6569	4.33075	-7.2052	-2.99312	0.730517	1.89862	32.5525	8.08833
2016-11-30 06:00:00	2.91236	2.09065	3.26478	3.50388	0.777981	1.91173	631.29	195.22	10.6195	0.48	0.2304	0.110592	-7.3686	-3.05665	0.483959	1.79707	32.5625	8.08864
2016-12-01 06:00:00	2.91236	2.09302	3.24631	3.51558	0.792707	1.91173	631.43	195.18	11.5655	0.62	0.3844	0.238328	-6.9056	-3.01257	0.296142	1.69636	32.5725	8.08895
2016-12-02 06:00:00	2.96193	2.16178	3.38485	3.66538	0.895783	2.00124	631.62	195.14	5.19599	0.81	0.6561	0.531441	-7.0585	-2.66765	0.146817	1.59089	32.5825	8.08925
2016-12-03 06:00:00	2.98317	2.20919	3.4749	3.76602	0.95223	2.04255	631.8	195.14	7.33751	0.99	0.9801	0.970299	-7.8432	-2.97518	-0.11515	1.42293	32.5925	8.08956
2016-12-04 06:00:00	2.96665	2.23527	3.46797	3.72623	0.932596	2.00813	631.95	195.18	10.5375	1.14	1.2996	1.48154	-6.8615	-3.36842	-0.336383	1.29164	32.6025	8.08987
2016-12-05 06:00:00	2.94541	2.23053	3.42641	3.64665	0.9056	1.97141	632.26	194.7	12.0745	1.45	2.1025	3.04863	-6.2379	-3.73362	-0.4983	1.19632	32.6125	8.09017
2016-12-06 06:00:00	2.97609	2.29928	3.49106	3.72155	0.989043	2.03566	632.54	194.7	7.616	1.73	2.9929	5.17772	-5.9469	-3.90012	-0.649667	1.08989	32.6225	8.09048
2016-12-07 06:00:00	3.00913	2.39886	3.61574	3.82688	1.04303	2.0655	632.57	194.7	6.80949	1.76	3.0976	5.45178	-6.7368	-4.20725	-0.856916	0.940917	32.6325	8.09079
2016-12-08 06:00:00	3.00441	2.42493	3.69424	3.89242	1.07248	2.07239	632.72	194.7	6.132	1.91	3.6481	6.96787	-6.4141	-4.63458	-1.09887	0.776517	32.6425	8.09109
2016-12-09 06:00:00	3.03037	2.45575	3.82816	3.99775	1.12893	2.12288	632.58	194.7	2.94801	1.77	3.1329	5.54523	-6.6552	-5.1399	-1.28781	0.629311	32.6525	8.0914
2016-12-10 06:00:00	3.01857	2.45812	3.84201	4.01179	1.1363	2.1114	632.73	194.7	4.82749	1.92	3.6864	7.07789	-8.1731	-5.76555	-1.49558	0.445184	32.6625	8.0917
2016-12-11 06:00:00	2.96665	2.39411	3.79121	3.96264	1.07494	2.03566	632.26	194.7	9.71	1.45	2.1025	3.04863	-9.6225	-6.40135	-1.67871	0.263906	32.6725	8.09201
2016-12-12 06:00:00	3.01857	2.43205	3.92282	4.11009	1.16575	2.12058	632.37	195.13	10.5105	1.56	2.4336	3.79642	-9.2037	-6.76475	-1.7754	0.164978	32.6825	8.09232
2016-12-13 06:00:00	2.91472	2.31114	3.7358	3.87369	0.991497	1.95304	631.9	194.7	12.2885	1.09	1.1881	1.29503	-8.4635	-6.98963	-1.8475	0.062167	32.6925	8.09262
2016-12-14 06:00:00	2.91472	2.29928	3.71502	3.88071	0.993951	1.96911	631.53	194.7	11.874	0.72	0.5184	0.373248	-7.2322	-6.98852	-1.87604	-0.033155	32.7025	8.09293
2016-12-15 06:00:00	2.94069	2.33484	3.8397	4.01413	1.04549	2.0173	631.21	195.79	7.76349	0.4	0.16	0.064	-5.447	-6.80665	-1.96907	-0.147655	32.7125	8.09323
2016-12-16 06:00:00	2.93832	2.32536	3.95515	4.10307	1.02831	2.00583	630.76	195.53	0.100491	-0.05	0.0025	-0.000125	-4.8598	-6.8337	-2.16794	-0.291533	32.7225	8.09354
2016-12-17 06:00:00	2.91472	2.2732	4.04519	4.2084	1.00377	1.98977	630.58	195.2	0.066006	-0.23	0.0529	-0.012167	-6.7817	-7.44518	-2.50336	-0.52485	32.7325	8.09384
2016-12-18 06:00:00	2.94541	2.29217	4.15602	4.3582	1.09212	2.05403	631.12	195.78	9.2575	0.31	0.0961	0.029791	-8.8706	-7.89785	-2.81317	-0.768466	32.7425	8.09415
2016-12-19 06:00:00	2.92416	2.26846	4.08444	4.26925	1.07248	2.02419	631.27	195.82	12.044	0.46	0.2116	0.097336	-9.4768	-7.55643	-2.98086	-0.841189	32.7525	8.09445
2016-12-20 06:00:00	2.8038	2.14044	3.80276	3.95795	0.866333	1.84289	630.71	194.7	13.0145	-0.1	0.01	-0.001	-9.4428	-7.3252	-3.13051	-0.867561	32.7625	8.09476
2016-12-21 06:00:00	2.63387	1.95077	3.46566	3.59984	0.647909	1.64322	630.76	194.7	15.358	-0.05	0.0025	-0.000125	-8.3926	-7.20545	-3.28313	-0.902205	32.7725	8.09507
2016-12-22 06:00:00	2.61735	1.89625	3.28095	3.40323	0.552195	1.58355	630.2	194.7	14.802	-0.61	0.3721	-0.226981	-5.3411	-7.01583	-3.3892	-0.909794	32.7825	8.09537
2016-12-23 06:00:00	2.55599	1.84172	3.23708	3.3377	0.483477	1.52158	629.95	194.7	5.63199	-0.86	0.7396	-0.636056	-2.3939	-6.53553	-3.48956	-0.923211	32.7925	8.09567
2016-12-24 06:00:00	2.46867	1.73503	3.1378	3.26046	0.382855	1.42979	629.65	194.7	5.424	-1.16	1.3456	-1.5609	-3.119	-6.6208	-3.70162	-1.05136	32.8025	8.09598
2016-12-25 06:00:00	2.48047	1.67576	3.20706	3.3377	0.387764	1.44355	629.27	194.7	8.5015	-1.54	2.3716	-3.65226	-4.443	-6.87648	-3.93242	-1.19149	32.8125	8.09628
2016-12-26 06:00:00	2.50171	1.66154	3.22784	3.36578	0.419668	1.48257	629.17	194.71	12.878	-1.64	2.6896	-4.41094	-5.3456	-7.05513	-4.13732	-1.29661	32.8225	8.09659
2016-12-27 06:00:00	2.44978	1.6971	3.06622	3.20428	0.294504	1.36553	628.95	194.7	9.045	-1.86	3.4596	-6.43486	-5.84161	-6.79203	-4.2395	-1.40521	32.8325	8.09689
2016-12-28 06:00:00	2.53003	1.75637	3.40563	3.52962	0.441756	1.50323	628.82	194.7	-2.06851	-1.99	3.9601	-7.8806	-6.993	-6.68025	-4.44001	-1.56182	32.8425	8.0972
2016-12-29 06:00:00	2.60791	1.76585	3.65499	3.8105	0.562012	1.60879	628.88	194.7	3.31651	-1.93	3.7249	-7.18906	-8.5331	-7.09028	-4.78232	-1.83953	32.8525	8.0975
2016-12-30 06:00:00	2.65039	1.84409	3.84894	4.01179	0.647909	1.66847	629.21	194.7	1.634	-1.6	2.56	-4.096	-8.9546	-7.07185	-4.95076	-2.04949	32.8625	8.09781
2016-12-31 06:00:00	2.74008	1.93892	4.08675	4.27159	0.797615	1.7901	629.59	195.38	5.12149	-1.22	1.4884	-1.81585	-10.3281	-7.23153	-5.16728	-2.27454	32.8725	8.09811
2017-01-01 06:00:00	2.69051	1.90099	3.97362	4.14988	0.726443	1.71207	629.69	195.61	9.89749	-1.12	1.2544	-1.40493	-11.8794	-7.46095	-5.31309	-2.44569	32.8825	8.09841
2017-01-02 06:00:00	2.61027	1.82512	3.80045	3.95795	0.628275	1.62027	629.71	195.83	10.458	-1.1	1.21	-1.331	-11.7089	-7.4916	-5.35007	-2.5681	32.8925	8.09872
2017-01-03 06:00:00	2.63387	1.90573	3.75427	3.95327	0.731352	1.67994	631.48	195.81	12.0725	0.67	0.4489	0.300763	-9.2036	-7.58313	-5.36666	-2.68092	32.9025	8.09902
2017-01-04 06:00:00	2.62207	1.9484	3.72195	3.89944	0.726443	1.66847	631.43	195.82	10.7645	0.62	0.3844	0.238328	-7.4524	-7.5732	-5.32962	-2.77181	32.9125	8.09933
2017-01-05 06:00:00	2.56307	1.87491	3.60188	3.76134	0.655271	1.59962	631.34	195.8	11.036	0.53	0.2809	0.148877	-5.6263	-7.42315	-5.32782	-2.88727	32.9225	8.09963
2017-01-06 06:00:00	2.50171	1.80378	3.45642	3.5741	0.547287	1.49634	631.36	195.81	12.2375	0.55	0.3025	0.166375	-4.4434	-6.87638	-5.40824	-2.98744	32.9325	8.09993
2017-01-07 06:00:00	2.49935	1.79193	3.36176	3.50388	0.542378	1.5124	631.11	195.81	13.379	0.3	0.09	0.027	-3.9754	-6.2678	-5.4878	-3.08843	32.9425	8.10024
2017-01-08 06:00:00	2.52295	1.81327	3.33405	3.47345	0.562012	1.55371	631.12	195.81	11.189	0.31	0.0961	0.029791	-3.3912	-6.06173	-5.53709	-3.13387	32.9525	8.10054
2017-01-09 06:00:00	2.43798	1.70658	3.21399	3.33301	0.441756	1.44355	630.75	195.83	7.445	-0.06	0.0036	-0.000216	-3.5679	-6.10448	-5.49544	-3.18082	32.9625	8.10084
2017-01-10 06:00:00	2.37898	1.61175	3.18166	3.32599	0.385309	1.39306	630.46	195.81	7.24401	-0.35	0.1225	-0.042875	-4.2318	-6.38295	-5.53366	-3.27382	32.9725	8.10115
2017-01-11 06:00:00	2.4545	1.6805	3.3733	3.54835	0.535016	1.51929	630.67	195.16	8.25099	-0.14	0.0196	-0.002744	-4.9902	-6.78865	-5.49071	-3.36568	32.9825	8.10145
2017-01-12 06:00:00	2.54655	1.76822	3.57879	3.78007	0.667542	1.65928	630.71	195.63	8.5645	-0.1	0.01	-0.001	-5.7875	-7.1162	-5.5423	-3.43885	32.9925	8.10175
2017-01-13 06:00:00	2.61263	1.8512	3.75427	3.96029	0.787798	1.75797	630.89	195.81	8.07401	0.08	0.0064	0.000512	-6.7504	-6.96958	-5.65293	-3.49926	33.0025	8.10206
2017-01-14 06:00:00	2.733	2.0219	4.01287	4.2201	0.942413	1.89108	631.04	195.58	5.21051	0.23	0.0529	0.012167	-7.3734	-6.83708	-5.81573	-3.60349	33.0125	8.10236
2017-01-15 06:00:00	2.8274	2.16889	4.28301	4.51034	1.08721	2.02649	631.02	195.73	4.421	0.21	0.0441	0.009261	-7.8203	-7.00163	-5.98563	-3.76444	33.0225	8.10266
2017-01-16 06:00:00	2.92416	2.25661	4.51159	4.74674	1.21483	2.15042	630.98	195.81	5.263	0.17	0.0289	0.004913	-8.3849	-7.42448	-6.14125	-3.94005	33.0325	8.10296
2017-01-17 06:00:00	2.94776	2.28032	4.60395	4.84504	1.25655	2.17795	630.85	195.32	5.417	0.04	0.0016	6.4e-05	-8.9825	-7.61358	-6.30947	-4.08884	33.0425	8.10327
2017-01-18 06:00:00	2.97373	2.3064	4.67091	4.92228	1.30073	2.22156	630.83	195.49	8.30699	0.02	0.0004	8e-06	-9.612	-7.2393	-6.48983	-4.24331	33.0525	8.10357
2017-01-19 06:00:00	2.95012	2.2732	4.60626	4.84738	1.27373	2.18714	630.57	195.8	10.0195	-0.24	0.0576	-0.013824	-9.5654	-6.98978	-6.60906	-4.3846	33.0625	8.10387
2017-01-20 06:00:00	2.95721	2.28269	4.59702	4.85206	1.286	2.19861	630.65	195.13	8.2495	-0.16	0.0256	-0.004096	-8.6036	-6.5705	-6.73446	-4.51963	33.0725	8.10417
2017-01-21 06:00:00	3.02329	2.4439	4.79097	5.06038	1.37681	2.28582	630.82	195.11	0.631992	0.01	0.0001	1e-06	-7.8379	-6.4141	-6.87993	-4.66932	33.0825	8.10448
2017-01-22 06:00:00	3.10825	2.54584	4.94566	5.19847	1.46761	2.36844	630.9	195.44	-0.122993	0.09	0.0081	0.000729	-8.7641	-6.87737	-7.11953	-4.89367	33.0925	8.10478
2017-01-23 06:00:00	3.07521	2.52451	4.91334	5.16805	1.43816	2.33631	630.73	195.81	1.8345	-0.08	0.0064	-0.000512	-9.8721	-7.40642	-7.32603	-5.09899	33.1025	8.10508
2017-01-24 06:00:00	3.09645	2.60037	4.99646	5.26635	1.53388	2.41204	631.53	195.35	2.56101	0.72	0.5184	0.373248	-11.1666	-7.91832	-7.43273	-5.29274	33.1125	8.10538
2017-01-25 06:00:00	3.14601	2.6549	5.13038	5.41147	1.62959	2.49237	631.58	195.82	3.6485	0.77	0.5929	0.456533	-12.6583	-8.3285	-7.52845	-5.49535	33.1225	8.10568
2017-01-26 06:00:00	3.2475	2.78767	5.29662	5.58935	1.81365	2.6645	632.3	195.56	5.507	1.49	2.2201	3.30795	-13.5785	-8.69787	-7.67314	-5.66602	33.1325	8.10599
2017-01-27 06:00:00	3.21682	2.80426	5.27815	5.55658	1.7842	2.6186	632.19	195.68	2.68399	1.38	1.9044	2.62807	-12.6035	-9.0344	-7.73335	-5.839	33.1425	8.10629
2017-01-28 06:00:00	3.18377	2.81374	5.23889	5.49105	1.77439	2.57499	632.4	195.8	4.1805	1.59	2.5281	4.01968	-12.0421	-9.56915	-7.7291	-6.0144	33.1525	8.10659
2017-01-29 06:00:00	3.09645	2.70943	5.07496	5.3038	1.6664	2.46942	632.18	195.81	11.2735	1.37	1.8769	2.57135	-11.5729	-9.91957	-7.78308	-6.11709	33.1625	8.10689
2017-01-30 06:00:00	3.02093	2.65016	4.84869	5.0674	1.55105	2.37073	632.29	195.08	13.3255	1.48	2.1904	3.24179	-9.8304	-9.72815	-7.77218	-6.15434	33.1725	8.10719
2017-01-31 06:00:00	3.09645	2.7521	4.96644	5.20315	1.67622	2.49696	632.23	195.65	4.521	1.42	2.0164	2.86329	-7.895	-9.42408	-7.74285	-6.16039	33.1825	8.10749
2017-02-01 06:00:00	3.13421	2.75448	5.04495	5.29678	1.73021	2.54286	632.06	195.67	7.7715	1.25	1.5625	1.95312	-8.0922	-9.61058	-7.7541	-6.24478	33.1925	8.1078
2017-02-02 06:00:00	3.1885	2.80663	5.13038	5.39742	1.79647	2.61401	632.07	195.81	5.148	1.26	1.5876	2.00038	-7.0747	-9.65022	-7.74687	-6.28569	33.2025	8.1081
2017-02-03 06:00:00	3.24042	2.85879	5.23889	5.53552	1.86519	2.68744	632.11	195.8	5.577	1.3	1.69	2.197	-6.8812	-9.79653	-7.83669	-6.33793	33.2125	8.1084
2017-02-04 06:00:00	3.19557	2.80189	5.1373	5.40445	1.80875	2.62548	632.02	195.45	9.68551	1.21	1.4641	1.77156	-8.0205	-9.7782	-7.94498	-6.39437	33.2225	8.1087
2017-02-05 06:00:00	3.06813	2.70943	4.87178	5.10017	1.61977	2.4786	631.89	195.8	11.724	1.08	1.1664	1.25971	-8.7485	-9.51497	-7.91049	-6.46299	33.2325	8.109
2017-02-06 06:00:00	2.94541	2.61697	4.65243	4.88249	1.47988	2.3409	631.85	195.81	9.53151	1.04	1.0816	1.12486	-7.30789	-9.19192	-7.82858	-6.52174	33.2425	8.1093
2017-02-07 06:00:00	2.93832	2.63119	4.67552	4.90824	1.49952	2.36614	631.85	195.61	1.72601	1.04	1.0816	1.12486	-6.95589	-8.9862	-7.77193	-6.59735	33.2525	8.1096
2017-02-08 06:00:00	3.01857	2.74736	4.9041	5.11655	1.61977	2.45106	631.59	195.8	6.35551	0.78	0.6084	0.474552	-7.64029	-9.31525	-7.79229	-6.67473	33.2625	8.1099
2017-02-09 06:00:00	3.08229	2.85879	5.0057	5.24763	1.6934	2.52221	631.33	195.82	3.397	0.52	0.2704	0.140608	-7.48459	-9.49845	-7.76682	-6.71231	33.2725	8.1102
2017-02-10 06:00:00	3.12241	2.82323	5.2135	5.42317	1.76212	2.59794	631.19	195.81	-1.73249	0.38	0.1444	0.054872	-8.74229	-9.74107	-7.87204	-6.72642	33.2825	8.1105
2017-02-11 06:00:00	3.08701	2.76396	5.21811	5.44658	1.70076	2.53139	630.86	195.67	2.21299	0.05	0.0025	0.000125	-11.4336	-9.8593	-8.07609	-6.87174	33.2925	8.1108
2017-02-12 06:00:00	2.98081	2.60037	5.12345	5.35061	1.57805	2.41893	630.66	195.71	-0.080498	-0.15	0.0225	-0.003375	-12.8973	-9.7425	-8.24402	-7.01607	33.3025	8.1111
2017-02-13 06:00:00	2.91	2.51028	5.10036	5.29678	1.47743	2.3432	630.14	195.82	-1.12149	-0.67	0.4489	-0.300763	-13.2586	-9.83825	-8.44326	-7.21521	33.3125	8.1114
2017-02-14 06:00:00	2.80852	2.34907	4.96644	5.18443	1.34736	2.23074	629.88	195.79	0.906994	-0.93	0.8649	-0.804357	-14.754	-10.0224	-8.59134	-7.39883	33.3225	8.1117
2017-02-15 06:00:00	2.75188	2.27083	4.92027	5.13762	1.28845	2.15501	629.94	195.8	1.3615	-0.87	0.7569	-0.658503	-15.252	-10.1594	-8.5779	-7.54162	33.3325	8.112
2017-02-16 06:00:00	2.68815	2.22342	4.7725	4.9925	1.16575	2.03337	629.91	195.68	6.86	-0.9	0.81	-0.729	-14.6332	-10.3667	-8.55631	-7.69712	33.3425	8.1123
2017-02-17 06:00:00	2.62443	2.09539	4.57855	4.7561	1.01358	1.89567	629.33	196.16	7.32949	-1.48	2.1904	-3.24179	-13.7038	-10.1579	-8.59627	-7.80132	33.3525	8.1126
2017-02-18 06:00:00	2.39314	1.754	4.08906	4.27394	0.684722	1.61797	628.79	195.83	9.89749	-2.02	4.0804	-8.24241	-12.2218	-10.0005	-8.67484	-7.89167	33.3625	8.1129
2017-02-19 06:00:00	2.28694	1.58567	3.83739	4.01179	0.500657	1.47339	627.98	195.7	7.763	-2.83	8.0089	-22.6652	-10.018	-10.0693	-8.72679	-7.97663	33.3725	8.1132
2017-02-20 06:00:00	2.24681	1.43394	3.61343	3.75666	0.323954	1.33569	626.91	195.83	10.922	-3.9	15.21	-59.319	-8.6468	-10.3474	-8.85338	-8.07902	33.3825	8.1135
2017-02-21 06:00:00	2.04385	1.07121	3.05929	3.22769	0.024542	1.10848	626.59	195.55	7.1185	-4.22	17.8084	-75.1514	-6.7347	-10.0273	-8.91804	-8.12442	33.3925	8.1138
2017-02-22 06:00:00	2.14769	1.21346	3.31327	3.53665	0.282233	1.33798	627.85	195.82	10.264	-2.96	8.7616	-25.9343	-6.683	-10.06	-8.89327	-8.18162	33.4025	8.1141
2017-02-23 06:00:00	2.19725	1.28695	3.29018	3.51324	0.350951	1.39077	628.67	195.9	10.7015	-2.14	4.5796	-9.80034	-6.0961	-9.8042	-8.8126	-8.15909	33.4125	8.1144
2017-02-24 06:00:00	2.44742	1.73503	3.95745	4.18733	0.785344	1.75797	629.42	195.69	1.22701	-1.39	1.9321	-2.68562	-5.9353	-9.54797	-8.77593	-8.13246	33.4225	8.1147
2017-02-25 06:00:00	2.72592	2.12621	4.58317	4.85206	1.23446	2.13894	630.35	195.42	1.80949	-0.46	0.2116	-0.097336	-7.2425	-9.9709	-8.97012	-8.25582	33.4325	8.115
2017-02-26 06:00:00	2.95721	2.46761	5.09805	5.38338	1.57805	2.43729	630.87	195.8	3.05301	0.06	0.0036	0.000216	-9.065	-10.4666	-9.09071	-8.33704	33.4425	8.1153
2017-02-27 06:00:00	2.97373	2.52214	5.16501	5.42551	1.59768	2.42582	630.88	195.86	3.211	0.07	0.0049	0.000343	-9.8781	-10.7905	-9.00535	-8.33011	33.4525	8.1156
2017-02-28 06:00:00	3.00441	2.57667	5.20657	5.48403	1.6664	2.48319	631.26	196.25	4.3815	0.45	0.2025	0.091125	-11.2887	-10.7163	-9.00711	-8.37687	33.4625	8.11589
2017-03-01 06:00:00	3.02565	2.64305	5.23428	5.52382	1.70812	2.51532	631.5	195.53	2.9675	0.69	0.4761	0.328509	-12.5527	-10.815	-8.96132	-8.44618	33.4725	8.11619
2017-03-02 06:00:00	2.97373	2.64305	5.15808	5.42083	1.6664	2.46942	631.52	196.26	2.3265	0.71	0.5041	0.357911	-12.2046	-10.8365	-8.99722	-8.54172	33.4825	8.11649
2017-03-03 06:00:00	2.81088	2.43205	4.95952	5.2289	1.49215	2.32024	631.44	194.94	2.0605	0.63	0.3969	0.250047	-12.1012	-10.6335	-9.1234	-8.5736	33.4925	8.11679
2017-03-04 06:00:00	2.77548	2.35618	4.90179	5.16102	1.4308	2.25598	631.01	195.86	6.59551	0.2	0.04	0.008	-12.2997	-10.6411	-9.26336	-8.63223	33.5025	8.11709
2017-03-05 06:00:00	2.69995	2.26372	4.67552	4.92228	1.27864	2.12058	630.72	196.13	10.8305	-0.09	0.0081	-0.000729	-11.6228	-10.3073	-9.35464	-8.67603	33.5125	8.11739
2017-03-06 06:00:00	2.71883	2.27794	4.57624	4.82164	1.28845	2.13894	630.92	194.81	9.80001	0.11	0.0121	0.001331	-10.333	-9.70975	-9.35354	-8.68986	33.5225	8.11769
2017-03-07 06:00:00	2.80616	2.38226	4.72632	4.9808	1.43571	2.28123	631.14	196.22	7.334	0.33	0.1089	0.035937	-8.96649	-9.2651	-9.37414	-8.66559	33.5325	8.11798
2017-03-08 06:00:00	2.81796	2.37515	4.73786	5.02995	1.42344	2.30877	631.07	195.43	6.4355	0.26	0.0676	0.017576	-7.965	-8.96647	-9.45587	-8.65976	33.5425	8.11828
2017-03-09 06:00:00	2.84628	2.40834	4.77711	5.05804	1.43816	2.32484	631.01	195.8	3.45451	0.2	0.04	0.008	-7.09	-8.9877	-9.57159	-8.65639	33.5525	8.11858
2017-03-10 06:00:00	2.8038	2.40834	4.71016	4.97377	1.4038	2.29041	631.18	195.81	8.012	0.37	0.1369	0.050653	-7.7182	-9.18145	-9.7005	-8.65076	33.5625	8.11888
2017-03-11 06:00:00	2.9218	2.56244	4.92719	5.22188	1.64186	2.50843	631.76	195.71	7.763	0.95	0.9025	0.857375	-8.2819	-9.27572	-9.69105	-8.61538	33.5725	8.11918
2017-03-12 06:00:00	2.98081	2.63356	4.9803	5.27103	1.72039	2.58188	632.03	195.81	10.0335	1.22	1.4884	1.81585	-8.6893	-9.27572	-9.6824	-8.63701	33.5825	8.11947
2017-03-13 06:00:00	2.97845	2.63356	4.90641	5.19379	1.71058	2.57728	632	195.45	12.237	1.19	1.4161	1.68516	-8.1494	-9.32015	-9.65269	-8.64231	33.5925	8.11977
2017-03-14 06:00:00	3.03981	2.72603	4.98491	5.28507	1.80629	2.65991	632.23	195.3	7.96201	1.42	2.0164	2.86329	-6.9891	-9.06422	-9.59148	-8.64288	33.6025	8.12007
2017-03-15 06:00:00	3.06813	2.79241	5.08651	5.38338	1.84065	2.69433	632	195.49	6.704	1.19	1.4161	1.68516	-6.0876	-9.17932	-9.59335	-8.68635	33.6125	8.12037
2017-03-16 06:00:00	3.09409	2.84694	5.18579	5.49339	1.85047	2.7104	631.57	194.75	4.941	0.76	0.5776	0.438976	-6.3492	-9.3792	-9.56846	-8.69812	33.6225	8.12066
2017-03-17 06:00:00	3.13421	2.86116	5.24813	5.56126	1.88973	2.74711	631.32	195.48	7.166	0.51	0.2601	0.132651	-6.9136	-9.1935	-9.55979	-8.64434	33.6325	8.12096
2017-03-18 06:00:00	3.15073	2.87776	5.30354	5.61276	1.91182	2.77466	631.15	194.7	9.0355	0.34	0.1156	0.039304	-7.4871	-8.92567	-9.52807	-8.56545	33.6425	8.12126
2017-03-19 06:00:00	3.11533	2.85405	5.17424	5.4536	1.85783	2.7104	631.19	194.7	10.825	0.38	0.1444	0.054872	-8.1274	-8.62655	-9.46777	-8.56792	33.6525	8.12155
2017-03-20 06:00:00	3.10117	2.85168	5.11191	5.39274	1.83574	2.70121	631.34	194.72	11.249	0.53	0.2809	0.148877	-7.5548	-8.24585	-9.4258	-8.58146	33.6625	8.12185
2017-03-21 06:00:00	3.04453	2.79241	4.92488	5.17741	1.72285	2.60024	631.2	194.76	13.846	0.39	0.1521	0.059319	-6.6458	-7.90247	-9.40531	-8.60108	33.6725	8.12215
2017-03-22 06:00:00	3.06813	2.86827	4.99415	5.27337	1.77193	2.65991	631.14	195.29	6.7875	0.33	0.1089	0.035937	-4.8648	-7.35855	-9.31203	-8.61788	33.6825	8.12245
2017-03-23 06:00:00	3.09881	2.8659	5.07727	5.367	1.82838	2.71498	630.9	195.44	10.035	0.09	0.0081	0.000729	-4.9405	-7.1355	-9.20944	-8.70693	33.6925	8.12274
2017-03-24 06:00:00	2.94305	2.68098	4.75633	5.03463	1.58296	2.51073	630.92	194.74	9.30249	0.11	0.0121	0.001331	-4.7406	-6.73677	-9.04014	-8.658	33.7025	8.12304
2017-03-25 06:00:00	2.95485	2.71417	4.76326	5.03931	1.6075	2.53827	630.84	194.85	9.749	0.03	0.0009	2.7e-05	-5.0451	-6.60142	-8.91567	-8.61491	33.7125	8.12334
2017-03-26 06:00:00	3.03037	2.79715	4.88332	5.16805	1.70567	2.63695	630.81	194.7	6.29001	0	0	0	-5.3451	-6.6555	-8.79587	-8.60105	33.7225	8.12363
2017-03-27 06:00:00	3.03037	2.7853	4.87871	5.16805	1.67376	2.61171	630.6	195.43	3.3735	-0.21	0.0441	-0.009261	-6.8563	-6.831	-8.75185	-8.67425	33.7325	8.12393
2017-03-28 06:00:00	2.89348	2.63594	4.65013	4.93867	1.5167	2.4763	630.45	194.7	6.95501	-0.36	0.1296	-0.046656	-7.5391	-7.02902	-8.78741	-8.73727	33.7425	8.12422
2017-03-29 06:00:00	2.94541	2.68335	4.67783	4.93633	1.56087	2.51991	630.5	194.93	10.5675	-0.31	0.0961	-0.029791	-8.1551	-7.00305	-8.71622	-8.637	33.7525	8.12452
2017-03-30 06:00:00	2.85572	2.5743	4.42616	4.65311	1.37926	2.34779	630.21	194.7	13.8325	-0.6	0.36	-0.216	-7.90209	-6.6474	-8.60977	-8.55644	33.7625	8.12482
2017-03-31 06:00:00	2.80852	2.53873	4.26685	4.48225	1.29582	2.26975	630.06	194.7	13.711	-0.75	0.5625	-0.421875	-7.0854	-6.35637	-8.56712	-8.4209	33.7725	8.12511
2017-04-01 06:00:00	2.90764	2.68809	4.45156	4.6812	1.47988	2.45336	630.62	195.44	4.33801	-0.19	0.0361	-0.006859	-5.6012	-6.05897	-8.5607	-8.32546	33.7825	8.12541
2017-04-02 06:00:00	2.91708	2.70943	4.47927	4.7444	1.53388	2.51073	631.33	195.54	2.72201	0.52	0.2704	0.140608	-5.40829	-6.34375	-8.56375	-8.38723	33.7925	8.1257
2017-04-03 06:00:00	2.82976	2.64779	4.37767	4.65779	1.52406	2.49696	631.94	195.72	5.148	1.13	1.2769	1.4429	-6.25489	-6.8195	-8.64791	-8.47319	33.8025	8.126
2017-04-04 06:00:00	2.75424	2.61697	4.30379	4.6063	1.5216	2.4786	632.48	195.01	5.906	1.67	2.7889	4.65746	-7.33879	-6.9602	-8.64791	-8.55013	33.8125	8.1263
2017-04-05 06:00:00	2.62443	2.44864	4.11677	4.38394	1.36208	2.32024	632.23	195.96	10.779	1.42	2.0164	2.86329	-8.92409	-7.0001	-8.64242	-8.60411	33.8225	8.12659
2017-04-06 06:00:00	2.48047	2.26372	3.8651	4.07967	1.14857	2.11369	632.36	195.44	14.644	1.55	2.4025	3.72388	-9.5105	-6.7082	-8.6242	-8.60697	33.8325	8.12689
2017-04-07 06:00:00	2.48283	2.24475	3.7104	3.9088	1.06758	2.06091	631.71	196.19	14.3615	0.9	0.81	0.729	-7.4493	-6.3343	-8.57553	-8.58023	33.8425	8.12718
2017-04-08 06:00:00	2.54183	2.29691	3.64806	3.87837	1.1093	2.12058	631.84	195.89	13.074	1.03	1.0609	1.09273	-5.1214	-6.068	-8.49503	-8.56931	33.8525	8.12748
2017-04-09 06:00:00	2.39786	2.10962	3.36176	3.4992	0.844245	1.8796	631.35	196.05	17.609	0.54	0.2916	0.157464	-3.5362	-5.95555	-8.3059	-8.54836	33.8625	8.12777
2017-04-10 06:00:00	2.35774	2.06457	3.18859	3.29791	0.750985	1.77862	631.7	195.73	19.028	0.89	0.7921	0.704969	-1.1956	-5.63755	-8.11834	-8.43543	33.8725	8.12807
2017-04-11 06:00:00	2.3955	2.13096	3.1378	3.28854	0.78289	1.81764	631.6	195.43	15.9895	0.79	0.6241	0.493039	0.454205	-5.37845	-7.85782	-8.3045	33.8825	8.12836
2017-04-12 06:00:00	2.42146	2.19497	3.17474	3.35876	0.854062	1.88878	631.77	194.79	10.808	0.96	0.9216	0.884736	0.723305	-4.91835	-7.56246	-8.21851	33.8925	8.12866
2017-04-13 06:00:00	2.57015	2.32536	3.35945	3.56473	1.07003	2.09992	632.11	195.55	9.58301	1.3	1.69	2.197	0.0126044	-4.8797	-7.41921	-8.19359	33.9025	8.12895
2017-04-14 06:00:00	2.55363	2.35144	3.38023	3.60452	1.0823	2.12517	632.1	196.17	5.295	1.29	1.6641	2.14669	-0.685596	-4.86567	-7.25815	-8.17682	33.9125	8.12925
2017-04-15 06:00:00	2.36246	2.09065	3.11471	3.32833	0.849153	1.92321	631.95	195.62	10.9945	1.14	1.2996	1.48154	-3.14839	-5.08837	-7.15121	-8.17588	33.9225	8.12954
2017-04-16 06:00:00	2.24209	1.88202	2.8538	3.03342	0.618458	1.72125	631.55	195.22	17.5305	0.74	0.5476	0.405224	-4.7551	-4.85315	-6.98308	-8.10284	33.9325	8.12984
2017-04-17 06:00:00	2.25154	1.87728	2.76837	2.92575	0.591462	1.70748	631.44	195.2	17.074	0.63	0.3969	0.250047	-4.4469	-4.1453	-6.7136	-7.96654	33.9425	8.13013
2017-04-18 06:00:00	2.23738	1.83461	2.646	2.78765	0.512928	1.64322	631.19	196.21	17.6585	0.38	0.1444	0.054872	-3.1937	-3.63935	-6.54336	-7.83701	33.9525	8.13043
2017-04-19 06:00:00	2.24681	1.83461	2.56519	2.73382	0.49084	1.62945	631.12	195.58	14.2195	0.31	0.0961	0.029791	-1.5786	-3.2848	-6.37121	-7.73311	33.9625	8.13072
2017-04-20 06:00:00	2.23029	1.82038	2.50747	2.67765	0.49084	1.64322	631.43	195.9	16.36	0.62	0.3844	0.238328	0.206299	-3.26545	-6.29918	-7.68644	33.9725	8.13102
2017-04-21 06:00:00	2.18309	1.72792	2.38971	2.54657	0.377947	1.54453	631.25	195.49	17.231	0.44	0.1936	0.085184	1.2794	-3.133	-6.1559	-7.59633	33.9825	8.13131
2017-04-22 06:00:00	2.27278	1.85594	2.49823	2.67999	0.535016	1.67994	631.68	195.13	11.083	0.87	0.7569	0.658503	1.2195	-2.48835	-6.05075	-7.41189	33.9925	8.1316
2017-04-23 06:00:00	2.2539	1.84409	2.52825	2.7268	0.525199	1.67076	631.87	194.71	12.0095	1.06	1.1236	1.19102	0.0213018	-2.0703	-5.98467	-7.28738	34.0025	8.1319
2017-04-24 06:00:00	2.18545	1.79667	2.49823	2.70339	0.498203	1.63634	631.96	195.62	10.5385	1.15	1.3225	1.52088	-1.1085	-1.72722	-5.95558	-7.17433	34.0125	8.13219
2017-04-25 06:00:00	2.08397	1.66154	2.38971	2.58636	0.375493	1.517	631.69	195.77	11.214	0.88	0.7744	0.681472	-1.8447	-1.4956	-5.9583	-7.08569	34.0225	8.13249
2017-04-26 06:00:00	2.12173	1.65442	2.36431	2.52317	0.363222	1.51929	631.45	195.57	16.6905	0.64	0.4096	0.262144	-2.8739	-1.47385	-5.79185	-7.00163	34.0325	8.13278
2017-04-27 06:00:00	2.15005	1.6805	2.35277	2.5138	0.353405	1.5124	631.23	195.19	12.858	0.42	0.1764	0.074088	-2.982	-1.37152	-5.54383	-6.87736	34.0425	8.13307
2017-04-28 06:00:00	2.27278	1.82038	2.56288	2.73148	0.525199	1.68223	631.19	194.99	6.64899	0.38	0.1444	0.054872	-2.627	-1.4467	-5.38041	-6.76432	34.0525	8.13337
2017-04-29 06:00:00	2.28222	1.86068	2.63907	2.84149	0.569374	1.72355	631.62	194.94	6.653	0.81	0.6561	0.531441	-3.6991	-1.76795	-5.32311	-6.73689	34.0625	8.13366
2017-04-30 06:00:00	2.18073	1.78482	2.56519	2.77361	0.515382	1.66387	631.78	194.7	7.9405	0.97	0.9409	0.912673	-4.4762	-2.31575	-5.28526	-6.78823	34.0725	8.13395
2017-05-01 06:00:00	2.02969	1.59041	2.39433	2.57934	0.355859	1.51929	631.88	195.35	11.7255	1.07	1.1449	1.22504	-5.1309	-2.87013	-5.20237	-6.84806	34.0825	8.13425
2017-05-02 06:00:00	2.02261	1.59278	2.32968	2.52317	0.341134	1.5147	632.09	194.78	15.5345	1.28	1.6384	2.09715	-6.1239	-3.08333	-5.04572	-6.76801	34.0925	8.13454
2017-05-03 06:00:00	1.98956	1.51929	2.19576	2.36166	0.230695	1.40913	632.33	195.58	18.2705	1.52	2.3104	3.51181	-5.5886	-2.847	-4.82116	-6.68176	34.1025	8.13483
2017-05-04 06:00:00	2.04149	1.57145	2.16113	2.3289	0.233149	1.41831	631.82	195.83	17.3145	1.01	1.0201	1.0303	-3.2643	-2.41263	-4.62657	-6.53595	34.1125	8.13513
2017-05-05 06:00:00	2.00609	1.49558	2.0226	2.18378	0.105531	1.30585	631.7	195.67	18.0585	0.89	0.7921	0.704969	-1.132	-1.81165	-4.51851	-6.40554	34.1225	8.13542
2017-05-06 06:00:00	2.02261	1.48136	1.96487	2.09718	0.068718	1.27832	631.38	195.73	18.0355	0.57	0.3249	0.185193	0.891602	-1.45845	-4.38087	-6.3125	34.1325	8.13571
2017-05-07 06:00:00	2.04621	1.52166	1.96949	2.1159	0.09326	1.30815	631.38	194.79	16.4845	0.57	0.3249	0.185193	2.1536	-1.4332	-4.20251	-6.24238	34.1425	8.13601
2017-05-08 06:00:00	2.01316	1.50032	1.9187	2.08781	0.056447	1.27832	631.44	194.7	14.529	0.63	0.3969	0.250047	2.3436	-1.46268	-4.03502	-6.16512	34.1525	8.1363
2017-05-09 06:00:00	1.999	1.47661	1.87021	2.0176	0.024542	1.25077	631.24	195.64	17.0565	0.43	0.1849	0.079507	1.5953	-1.61915	-3.85045	-6.02287	34.1625	8.13659
2017-05-10 06:00:00	1.95416	1.41497	1.764	1.90291	-0.066263	1.18881	631.19	194.78	12.1325	0.38	0.1444	0.054872	1.5437	-1.4773	-3.69971	-5.90397	34.1725	8.13688
2017-05-11 06:00:00	1.8338	1.26087	1.5839	1.70864	-0.193882	1.06717	631.17	194.7	14.2895	0.36	0.1296	0.046656	0.358499	-1.68868	-3.62688	-5.8069	34.1825	8.13718
2017-05-12 06:00:00	1.74647	1.17315	1.48001	1.54948	-0.284687	0.97767	631.88	195.38	19.0925	1.07	1.1449	1.22504	-0.3907	-1.83575	-3.55595	-5.62888	34.1925	8.13747
2017-05-13 06:00:00	1.86448	1.29406	1.51464	1.63374	-0.174248	1.08783	632.16	195.19	18.293	1.35	1.8225	2.46038	0.130898	-1.43528	-3.44169	-5.44133	34.2025	8.13776
2017-05-14 06:00:00	1.74411	1.17315	1.34378	1.43479	-0.341134	0.94095	631.88	194.7	15.571	1.07	1.1449	1.22504	0.883698	-1.1211	-3.26951	-5.23718	34.2125	8.13805
2017-05-15 06:00:00	1.62847	1.01431	1.1937	1.29669	-0.441756	0.84456	632.05	194.71	12.2555	1.24	1.5376	1.90662	0.586598	-0.869476	-3.12172	-5.05171	34.2225	8.13835
2017-05-16 06:00:00	1.72287	1.11625	1.25373	1.38798	-0.326409	0.97308	632.38	194.7	14.521	1.57	2.4649	3.86989	0.611199	-0.817401	-2.99982	-4.92562	34.2325	8.13864
2017-05-17 06:00:00	1.73231	1.11151	1.26066	1.42777	-0.309229	0.975375	632.36	194.7	16.7245	1.55	2.4025	3.72388	0.657498	-0.925876	-2.87723	-4.7794	34.2425	8.13893
2017-05-18 06:00:00	1.61667	0.98823	1.1683	1.29903	-0.46139	0.81702	631.67	195.49	16.8565	0.86	0.7396	0.636056	0.1839	-0.732551	-2.74908	-4.66979	34.2525	8.13922
2017-05-19 06:00:00	1.46798	0.763004	0.969738	1.072	-0.692084	0.61047	631.48	194.7	14.1285	0.67	0.4489	0.300763	-0.103401	-0.222176	-2.64856	-4.56394	34.2625	8.13951
2017-05-20 06:00:00	1.41606	0.698992	0.872764	0.961987	-0.807432	0.530145	630.98	195.81	17.9945	0.17	0.0289	0.004913	-0.391898	0.1516	-2.60057	-4.51693	34.2725	8.13981
2017-05-21 06:00:00	1.39954	0.613643	0.738848	0.835594	-0.88842	0.470475	630.71	195.17	18.137	-0.1	0.01	-0.001	0.755898	0.6543	-2.53142	-4.40324	34.2825	8.1401
2017-05-22 06:00:00	1.34762	0.540148	0.634948	0.706861	-0.986588	0.387855	630.51	195.62	18.535	-0.3	0.09	-0.027	1.4791	0.974875	-2.34227	-4.32308	34.2925	8.14039
2017-05-23 06:00:00	1.32402	0.476137	0.521811	0.568766	-1.10439	0.296055	629.95	195.78	19.2685	-0.86	0.7396	-0.636056	1.8412	1.1249	-2.2006	-4.19623	34.3025	8.14068
2017-05-24 06:00:00	1.27681	0.355226	0.348644	0.355771	-1.24919	0.181305	629.68	195.47	20.938	-1.13	1.2769	-1.4429	2.3236	1.1748	-2.0345	-4.09618	34.3125	8.14097
2017-05-25 06:00:00	1.38066	0.4548	0.350953	0.409605	-1.17311	0.273105	629.51	195.68	17.8065	-1.3	1.69	-2.197	3.6855	1.35597	-1.84802	-3.98244	34.3225	8.14126
2017-05-26 06:00:00	1.44438	0.523553	0.353262	0.43067	-1.12893	0.32589	629.38	195.46	12.9125	-1.43	2.0449	-2.92421	3.6479	1.34337	-1.65607	-3.79822	34.3325	8.14155
2017-05-27 06:00:00	1.3901	0.450058	0.279377	0.38854	-1.19274	0.29376	628.92	194.7	13.3475	-1.89	3.5721	-6.75127	2.603	1.08722	-1.49709	-3.67485	34.3425	8.14184
2017-05-28 06:00:00	1.3901	0.442946	0.283995	0.379177	-1.1682	0.309825	628.96	194.7	13.593	-1.85	3.4225	-6.33162	1.5655	0.930375	-1.39055	-3.56047	34.3525	8.14214
2017-05-29 06:00:00	1.24849	0.215349	0.090047	0.210654	-1.33263	0.181305	628.79	194.7	12.3585	-2.02	4.0804	-8.24241	0.430402	0.883575	-1.34012	-3.44512	34.3625	8.14243
2017-05-30 06:00:00	1.09981	0.016202	-0.120063	-0.042131	-1.51179	0.03213	628.61	194.7	16.8905	-2.2	4.84	-10.648	-1.2855	0.648676	-1.36469	-3.35648	34.3725	8.14272
2017-05-31 06:00:00	1.06204	-0.066776	-0.244743	-0.182567	-1.62468	-0.05508	628.39	194.7	18.2895	-2.42	5.8564	-14.1725	-1.4687	0.886575	-1.3117	-3.20178	34.3825	8.14301
2017-06-01 06:00:00	1.11869	-0.035956	-0.302466	-0.243422	-1.64431	-0.05049	628.24	194.87	20.5945	-2.57	6.6049	-16.9746	-0.393298	1.08658	-1.07917	-3.02442	34.3925	8.1433
2017-06-02 06:00:00	1.24377	0.108663	-0.193948	-0.114689	-1.46516	0.0918	628.85	195.63	19.176	-1.96	3.8416	-7.52954	1.0561	1.16168	-0.781299	-2.81848	34.4025	8.14359
2017-06-03 06:00:00	1.3311	0.186899	-0.108518	0	-1.37681	0.167535	629.01	195.21	18.4475	-1.8	3.24	-5.832	2.1727	1.20583	-0.5475	-2.6787	34.4125	8.14388
2017-06-04 06:00:00	1.38066	0.196382	-0.076194	0.030428	-1.35963	0.199665	628.55	195.14	19.043	-2.26	5.1076	-11.5432	3.3905	1.34965	-0.338474	-2.59407	34.4225	8.14417
2017-06-05 06:00:00	1.45146	0.295956	0.030016	0.15448	-1.28109	0.254745	628.54	194.91	17.0275	-2.27	5.1529	-11.6971	3.821	1.68903	-0.200741	-2.49137	34.4325	8.14446
2017-06-06 06:00:00	1.45146	0.274619	0.039251	0.173204	-1.27618	0.259335	628.57	194.73	19.7885	-2.24	5.0176	-11.2394	3.5686	1.81435	-0.161016	-2.38366	34.4425	8.14475
2017-06-07 06:00:00	1.37594	0.179787	-0.138534	-0.032768	-1.44307	0.130815	628.09	195.99	21.08	-2.72	7.3984	-20.1236	3.4074	1.96755	-0.0705661	-2.23529	34.4525	8.14504
2017-06-08 06:00:00	1.30986	0.094438	-0.31401	-0.257466	-1.59278	0.025245	627.61	194.72	21.404	-3.2	10.24	-32.768	3.7882	2.17873	0.0628673	-2.03945	34.4625	8.14533
2017-06-09 06:00:00	1.35234	0.146596	-0.323246	-0.215335	-1.5486	0.084915	627.51	195.05	19.861	-3.3	10.89	-35.937	4.3795	2.5425	0.126117	-1.89065	34.4725	8.14562
2017-06-10 06:00:00	1.30513	0.087326	-0.431764	-0.374496	-1.66395	-0.006885	627.25	194.91	21.6965	-3.56	12.6736	-45.118	4.5431	2.63583	0.14	-1.75623	34.4825	8.14591
2017-06-11 06:00:00	1.27209	-0.009877	-0.667272	-0.646006	-1.84801	-0.126225	625.81	194.77	20.9255	-5	25	-125	5.4769	2.8138	0.235117	-1.62664	34.4925	8.1462
2017-06-12 06:00:00	1.00304	-0.43188	-1.24681	-1.2335	-2.2186	-0.40392	625.61	195.13	21.653	-5.2	27.04	-140.608	5.7043	2.93333	0.403742	-1.5301	34.5025	8.14649
2017-06-13 06:00:00	1.04552	-0.379722	-1.2445	-1.22647	-2.17933	-0.378675	626.32	194.99	21.927	-4.49	20.1601	-90.5188	5.8189	3.05255	0.604908	-1.37798	34.5125	8.14678
2017-06-14 06:00:00	1.08565	-0.318081	-1.18447	-1.12115	-2.07625	-0.27999	627.04	195.26	20.897	-3.77	14.2129	-53.5826	5.9235	3.102	0.882108	-1.20884	34.5225	8.14707
2017-06-15 06:00:00	1.20601	-0.156867	-0.951267	-0.805166	-1.81611	-0.084915	628.26	195.33	16.46	-2.55	6.5025	-16.5814	6.1307	3.25653	1.04715	-1.03155	34.5325	8.14736
2017-06-16 06:00:00	1.47978	0.293585	-0.355571	-0.191929	-1.37435	0.26163	629.52	196.01	16.5935	-1.29	1.6641	-2.14669	5.0834	3.4339	1.02931	-0.928282	34.5425	8.14765
2017-06-17 06:00:00	1.64735	0.559115	0.023089	0.208313	-1.0823	0.48654	630.42	195.94	16.719	-0.39	0.1521	-0.059319	4.217	3.5962	1.0213	-0.844305	34.5525	8.14794
2017-06-18 06:00:00	1.79368	0.819903	0.367115	0.554722	-0.871241	0.649485	631.1	206.06	16.433	0.29	0.0841	0.024389	3.2302	3.7525	1.00564	-0.778816	34.5625	8.14823
2017-06-19 06:00:00	1.81492	0.84124	0.454853	0.646006	-0.819703	0.690795	631.53	195.51	18.4075	0.72	0.5184	0.373248	2.1314	3.95623	1.04253	-0.721216	34.5725	8.14852
2017-06-20 06:00:00	1.80312	0.829386	0.498722	0.660049	-0.831974	0.658665	631.43	195.47	21.1605	0.62	0.3844	0.238328	1.6335	4.03208	1.07666	-0.670532	34.5825	8.14881
2017-06-21 06:00:00	2.12645	1.45291	1.28375	1.37393	-0.387764	1.01898	631.23	195.41	20.0955	0.42	0.1764	0.074088	2.57361	4.17563	1.14215	-0.510832	34.5925	8.1491
2017-06-22 06:00:00	2.09105	1.35807	1.1937	1.28733	-0.46139	0.9639	630.9	195.58	21.4405	0.09	0.0081	0.000729	3.274	4.15068	1.29236	-0.399049	34.6025	8.14939
2017-06-23 06:00:00	2.05801	1.32488	1.14291	1.23584	-0.50802	0.90882	630.94	195.73	20.6565	0.13	0.0169	0.002197	4.2183	4.2639	1.44954	-0.264182	34.6125	8.14967
2017-06-24 06:00:00	1.71579	0.758262	0.401749	0.519613	-1.02586	0.511785	630	195.77	20.5865	-0.81	0.6561	-0.531441	5.063	4.37435	1.61818	-0.142988	34.6225	8.14996
2017-06-25 06:00:00	1.61431	0.661059	0.175476	0.212995	-1.21974	0.364905	629.46	195.3	21.0205	-1.35	1.8225	-2.46037	5.4988	4.45153	1.77438	0.0158622	34.6325	8.15025
2017-06-26 06:00:00	1.48214	0.464283	-0.150078	-0.107668	-1.46761	0.190485	628.54	195.67	21.24	-2.27	5.1529	-11.6971	5.4708	4.65118	1.84655	0.21194	34.6425	8.15054
2017-06-27 06:00:00	1.52699	0.490362	-0.191639	-0.098305	-1.44061	0.2295	628.3	195.19	19.512	-2.51	6.3001	-15.8133	5.6997	4.72375	1.98625	0.370662	34.6525	8.15083
2017-06-28 06:00:00	1.57183	0.530665	-0.122372	0.004681	-1.33509	0.30753	628.99	195.58	20.442	-1.82	3.3124	-6.02857	5.314	4.64535	2.20063	0.470045	34.6625	8.15112
2017-06-29 06:00:00	1.55059	0.48562	-0.182403	-0.063196	-1.39399	0.25704	628.65	196.09	21.372	-2.16	4.6656	-10.0777	5.2711	4.59725	2.43045	0.543484	34.6725	8.15141
2017-06-30 06:00:00	1.47506	0.36708	-0.353262	-0.222357	-1.52651	0.16065	628.71	195.42	18.934	-2.1	4.41	-9.261	5.4282	4.6728	2.65431	0.628606	34.6825	8.15169
2017-07-01 06:00:00	1.31694	0.163191	-0.623403	-0.578128	-1.76702	-0.029835	628.78	194.86	21.063	-2.03	4.1209	-8.36543	5.0109	4.53468	2.77445	0.790784	34.6925	8.15198
2017-07-02 06:00:00	1.23433	0.054134	-0.808115	-0.74197	-1.8701	-0.10557	628.82	194.71	22.0135	-1.99	3.9601	-7.8806	4.9755	4.54155	2.86659	0.994573	34.7025	8.15227
2017-07-03 06:00:00	1.06676	-0.168721	-1.08749	-1.03455	-2.07134	-0.2754	628.99	194.7	22.3455	-1.82	3.3124	-6.02857	5.4758	4.55958	2.92898	1.18197	34.7125	8.15256
2017-07-04 06:00:00	1.02664	-0.237474	-1.22833	-1.15392	-2.13025	-0.30753	629.16	195.1	21.475	-1.65	2.7225	-4.49212	5.8565	4.5805	3.01283	1.36463	34.7225	8.15285
2017-07-05 06:00:00	1.0408	-0.25644	-1.30684	-1.23584	-2.1916	-0.360315	629.22	194.78	21.73	-1.59	2.5281	-4.01968	5.8771	4.6094	3.06977	1.48347	34.7325	8.15313
2017-07-06 06:00:00	1.05968	-0.246957	-1.32993	-1.25924	-2.17933	-0.33966	629.17	195.33	20.4535	-1.64	2.6896	-4.41094	6.4363	4.8729	3.13134	1.56221	34.7425	8.15342
2017-07-07 06:00:00	1.05261	-0.275407	-1.40612	-1.35287	-2.2505	-0.40392	628.9	195.95	21.8925	-1.91	3.6481	-6.96787	6.3144	5.0659	3.19749	1.62989	34.7525	8.15371
2017-07-08 06:00:00	1.05733	-0.25644	-1.37149	-1.31542	-2.2186	-0.37179	629.41	196.23	21.3025	-1.4	1.96	-2.744	6.2902	5.32458	3.32022	1.72788	34.7625	8.154
2017-07-09 06:00:00	1.09273	-0.213766	-1.3484	-1.28031	-2.18424	-0.328185	629.58	196.03	21.034	-1.23	1.5129	-1.86087	6.0816	5.56805	3.39098	1.76892	34.7725	8.15428
2017-07-10 06:00:00	1.08565	-0.230362	-1.39919	-1.36925	-2.2235	-0.35343	629.61	195.86	21.715	-1.2	1.44	-1.728	5.9934	5.69937	3.53934	1.79121	34.7825	8.15457
2017-07-11 06:00:00	1.05733	-0.239845	-1.46384	-1.44649	-2.25296	-0.3672	629.63	195.76	21.009	-1.18	1.3924	-1.64303	5.9904	5.7271	3.6631	1.85482	34.7925	8.15486
2017-07-12 06:00:00	1.01248	-0.282519	-1.49848	-1.43479	-2.25786	-0.38097	629.91	196.13	20.523	-0.9	0.81	-0.729	6.1015	5.77278	3.69504	1.96817	34.8025	8.15515
2017-07-13 06:00:00	1.06204	-0.227991	-1.45692	-1.39032	-2.22841	-0.346545	630.18	196.12	20.703	-0.63	0.3969	-0.250047	5.8276	5.7269	3.73221	2.08972	34.8125	8.15543
2017-07-14 06:00:00	1.06204	-0.216137	-1.44768	-1.36691	-2.18915	-0.296055	630.39	195.84	21.0855	-0.42	0.1764	-0.074088	5.7077	5.72923	3.81774	2.26092	34.8225	8.15572
2017-07-15 06:00:00	1.00776	-0.268294	-1.47539	-1.42308	-2.2505	-0.360315	630.38	195.85	22.5395	-0.43	0.1849	-0.079507	5.718	5.75418	3.96491	2.37304	34.8325	8.15601
2017-07-16 06:00:00	0.866157	-0.446104	-1.6347	-1.38095	-2.40266	-0.507195	630.41	195.88	20.5025	-0.4	0.16	-0.064	5.8829	5.83013	4.09855	2.4287	34.8425	8.1563
2017-07-17 06:00:00	0.69859	-0.695038	-1.85405	-1.61033	-2.59409	-0.677025	630.43	195.26	22.276	-0.38	0.1444	-0.054872	5.7816	5.79325	4.16152	2.46679	34.8525	8.15658
2017-07-18 06:00:00	0.672629	-0.744825	-1.93717	-1.68991	-2.68244	-0.764235	630.57	196.2	21.034	-0.24	0.0576	-0.013824	6.1322	5.93145	4.25184	2.5181	34.8625	8.15687
2017-07-19 06:00:00	0.686789	-0.747196	-1.95795	-1.72034	-2.70698	-0.78489	630.56	195.51	20.8855	-0.25	0.0625	-0.015625	6.1984	5.96105	4.36693	2.59382	34.8725	8.15716
2017-07-21 06:00:00	0.545183	-0.96531	-2.22347	-2.00589	-2.92295	-0.9639	630.1	195.84	21.342	-0.71	0.5041	-0.357911	6.1584	5.93673	4.41512	2.6441	34.8925	8.15773
2017-07-22 06:00:00	0.420098	-1.13838	-2.39895	-2.19314	-3.08984	-1.09701	629.85	194.7	21.342	-0.96	0.9216	-0.884736	5.9189	6.05713	4.46853	2.68978	34.9025	8.15802
2017-07-23 06:00:00	0.316253	-1.32804	-2.60213	-2.39443	-3.23218	-1.20487	629.93	194.79	21.137	-0.88	0.7744	-0.681472	6.0868	6.07108	4.51532	2.80377	34.9125	8.1583
2017-07-24 06:00:00	0.280852	-1.39917	-2.70141	-2.51614	-3.34017	-1.2875	629.6	194.92	21.6185	-1.21	1.4641	-1.77156	5.859	6.02725	4.54646	2.90518	34.9225	8.15859
2017-07-25 06:00:00	0.184088	-1.56986	-2.92076	-2.75723	-3.53896	-1.44585	628.71	196.2	21.9785	-2.1	4.41	-9.261	5.9759	5.9909	4.5578	3.02829	34.9325	8.15887
2017-07-26 06:00:00	0.118005	-1.73582	-3.17012	-2.93277	-3.64449	-1.49863	628.81	194.71	20.9085	-2	4	-8	6.1945	6.01608	4.62733	3.1479	34.9425	8.15916
2017-07-27 06:00:00	0.158127	-1.71211	-3.19321	-2.9632	-3.64694	-1.49175	628.14	195.65	22.1555	-2.67	7.1289	-19.0342	6.1078	5.975	4.7606	3.19477	34.9525	8.15945
2017-07-28 06:00:00	0.077883	-1.83302	-3.30634	-3.08959	-3.7672	-1.57896	627.99	194.7	22.1555	-2.82	7.9524	-22.4258	6.2705	6.0601	4.9074	3.29807	34.9625	8.15973
2017-07-29 06:00:00	0.066083	-1.65284	-3.252	-2.90702	-3.62731	-1.44815	627.68	195.27	21.655	-3.13	9.7969	-30.6643	6.4742	6.07325	5.05011	3.47037	34.9725	8.16002
2017-07-30 06:00:00	0.23837	-1.37309	-3.20244	-2.50678	-3.33035	-1.22782	628.59	196.04	23.571	-2.22	4.9284	-10.941	6.4815	6.09088	5.20505	3.63706	34.9825	8.1603
2017-07-31 06:00:00	0.427178	-1.13127	-2.89074	-2.10888	-3.04812	-1.03734	629.02	195.51	22.6365	-1.79	3.2041	-5.73534	6.8	6.21773	5.31639	3.81073	34.9925	8.16059
2017-08-01 06:00:00	0.592385	-0.913152	-2.54441	-1.74609	-2.79533	-0.865215	630.2	197.38	22.461	-0.61	0.3721	-0.226981	7.1456	6.2638	5.38884	3.93196	35.0025	8.16088
2017-08-02 13:29:00	1.19185	0.020943	-2.21193	-0.89645	-2.16706	-0.35343	631.18	195.27	22.549	0.37	0.1369	0.050653	7.2067	6.3364	5.41995	4.00892	35.0156	8.16125
2017-08-03 06:00:00	1.19185	-0.031214	-1.18447	-0.940921	-2.18424	-0.364905	630.77	195.84	22.7915	-0.04	0.0016	-6.4e-05	7.2854	6.4377	5.47617	4.05646	35.0225	8.16145
2017-08-04 06:00:00	0.901558	-0.564644	-1.88868	-1.62438	-2.65299	-0.68391	630.37	195.73	23.445	-0.44	0.1936	-0.085184	7.5127	6.54213	5.54857	4.11732	35.0325	8.16173
2017-08-05 06:00:00	0.774113	-0.747196	-2.12419	-1.87248	-2.84442	-0.837675	630.16	194.99	22.988	-0.65	0.4225	-0.274625	7.4875	6.6601	5.62193	4.17717	35.0425	8.16202
2017-08-06 06:00:00	0.516862	-1.13601	-2.54441	-2.34996	-3.18801	-1.11308	629.64	194.72	23.5465	-1.17	1.3689	-1.60161	7.5578	6.68253	5.72128	4.2322	35.0525	8.1623
2017-08-07 06:00:00	0.339854	-1.4205	-2.88382	-2.68467	-3.44324	-1.3334	629.22	194.7	23.236	-1.59	2.5281	-4.01968	7.7749	6.83473	5.78391	4.31066	35.0625	8.16259
2017-08-08 06:00:00	0.271411	-1.54853	-3.04544	-2.8766	-3.57822	-1.41831	628.9	194.7	23.7355	-1.91	3.6481	-6.96787	7.9123	6.88273	5.81984	4.40741	35.0725	8.16287
2017-08-09 06:00:00	0.169927	-1.70974	-3.20706	-3.0381	-3.71075	-1.54453	629.27	194.7	22.6765	-1.54	2.3716	-3.65226	8.1011	7.0178	5.8587	4.48162	35.0825	8.16316
2017-08-10 06:00:00	0.106204	-1.83065	-3.36407	-3.17619	-3.78929	-1.62027	629.47	194.7	22.5105	-1.34	1.7956	-2.4061	7.9474	7.10735	5.90563	4.59877	35.0925	8.16344
2017-08-11 06:00:00	0.361095	-1.4371	-2.97386	-2.70105	-3.42852	-1.31963	630.46	195.93	22.063	-0.35	0.1225	-0.042875	7.8519	7.16578	5.91919	4.69012	35.1025	8.16373
2017-08-12 06:00:00	0.516862	-1.18816	-2.69679	-2.43891	-3.21009	-1.15209	631.03	196.1	22.564	0.22	0.0484	0.010648	7.5552	7.20183	5.93815	4.72312	35.1125	8.16401
2017-08-13 06:00:00	0.46494	-1.25218	-2.74297	-2.51146	-3.28372	-1.23242	631.24	194.85	22.2645	0.43	0.1849	0.079507	7.4208	7.27318	5.95333	4.77058	35.1225	8.1643
2017-08-14 06:00:00	0.422458	-1.27351	-2.73374	-2.51146	-3.28126	-1.24619	631.76	195.82	22.0245	0.95	0.9025	0.857375	7.1266	7.30548	5.95896	4.84495	35.1325	8.16458
2017-08-15 06:00:00	0.410658	-1.29011	-2.73143	-2.50444	-3.29354	-1.25766	631.75	195.39	22.009	0.94	0.8836	0.830584	6.9962	7.30778	5.97775	4.9535	35.1425	8.16487
2017-08-16 06:00:00	0.387056	-1.32093	-2.7245	-2.50912	-3.29354	-1.25766	631.9	195.6	22.1045	1.09	1.1881	1.29503	6.8959	7.3628	6.07023	5.0367	35.1525	8.16515
2017-08-17 06:00:00	0.512142	-1.15497	-2.5675	-2.25634	-3.10211	-1.09242	631.85	195.54	20.519	1.04	1.0816	1.12486	6.9042	7.36025	6.16208	5.09647	35.1625	8.16543
2017-08-18 06:00:00	0.627787	-0.962939	-2.34584	-2.0176	-2.95486	-0.97308	631.95	195.77	20.153	1.14	1.2996	1.48154	6.4952	7.27843	6.22542	5.13717	35.1725	8.16572
2017-08-19 06:00:00	0.729271	-0.796983	-2.18653	-1.8678	-2.8346	-0.89505	632.02	196.07	20.954	1.21	1.4641	1.77156	6.0729	7.20333	6.28742	5.20411	35.1825	8.166
2017-08-20 06:00:00	0.590025	-0.981905	-2.31121	-2.06207	-2.98185	-1.00292	632.16	195.38	21.294	1.35	1.8225	2.46038	5.8588	7.07248	6.32986	5.23699	35.1925	8.16629
2017-08-21 06:00:00	0.523942	-1.08622	-2.41742	-2.15101	-3.05302	-1.06029	632.06	195.63	21.019	1.25	1.5625	1.95312	5.7158	7.00535	6.33208	5.27207	35.2025	8.16657
2017-08-22 06:00:00	0.542823	-1.0388	-2.41511	-2.1674	-3.06284	-1.06717	631.97	195.62	22.765	1.16	1.3456	1.5609	5.4987	6.93325	6.34748	5.29967	35.2125	8.16686
2017-08-23 06:00:00	0.722191	-0.799354	-2.16575	-1.88418	-2.84196	-0.88587	632.01	196.17	22.7395	1.2	1.44	1.728	5.9479	6.94405	6.36955	5.33852	35.2225	8.16714
2017-08-24 06:00:00	0.826035	-0.67133	-2.0226	-1.69459	-2.70698	-0.773415	631.74	195.88	21.1435	0.93	0.8649	0.804357	6.4652	6.94145	6.40427	5.35853	35.2325	8.16742
2017-08-25 06:00:00	0.769393	-0.775646	-2.14728	-1.85141	-2.8616	-0.892755	631.06	195.66	22.6995	0.25	0.0625	0.015625	6.5031	6.82637	6.41355	5.39561	35.2425	8.16771
2017-08-26 06:00:00	0.623066	-1.00561	-2.43589	-2.18612	-3.08738	-1.05111	630.4	195.36	21.4005	-0.41	0.1681	-0.068921	6.7842	6.81195	6.44153	5.50436	35.2525	8.16799
2017-08-27 06:00:00	0.516862	-1.1692	-2.60906	-2.34996	-3.19782	-1.13832	630.22	195.21	22.338	-0.59	0.3481	-0.205379	6.8605	6.70465	6.44421	5.59383	35.2625	8.16827
2017-08-28 06:00:00	0.533383	-1.16209	-2.59059	-2.33592	-3.19782	-1.14291	630.02	195.59	21.9735	-0.79	0.6241	-0.493039	6.7751	6.65975	6.49131	5.691	35.2725	8.16856
2017-08-29 06:00:00	0.453139	-1.30908	-2.76375	-2.51146	-3.37453	-1.2852	629.42	195.65	22.983	-1.39	1.9321	-2.68562	6.6219	6.57165	6.51683	5.79783	35.2825	8.16884
2017-08-30 06:00:00	0.368176	-1.45369	-2.94385	-2.73148	-3.52178	-1.40684	629.17	194.7	21.4635	-1.64	2.6896	-4.41094	6.9898	6.58698	6.54368	5.86553	35.2925	8.16912
2017-08-31 06:00:00	0.285572	-1.59831	-3.10316	-2.88362	-3.62976	-1.47798	629.18	194.7	22.7455	-1.63	2.6569	-4.33075	6.7426	6.53463	6.58584	5.9008	35.3025	8.16941
2017-09-01 06:00:00	0.375256	-1.46792	-2.9323	-2.69637	-3.4776	-1.37471	629.76	194.7	21.1485	-1.05	1.1025	-1.15762	7.0116	6.56875	6.61388	5.9247	35.3125	8.16969
2017-09-02 06:00:00	0.48382	-1.32567	-2.75914	-2.49508	-3.35244	-1.26455	629.59	194.71	20.461	-1.22	1.4884	-1.81585	6.77371	6.49798	6.59947	5.94661	35.3225	8.16997
2017-09-03 06:00:00	0.450779	-1.35175	-2.73605	-2.43891	-3.31562	-1.237	629.68	194.7	19.758	-1.13	1.2769	-1.4429	6.4712	6.4078	6.56806	5.96898	35.3325	8.17026
2017-09-04 06:00:00	0.639587	-1.08385	-2.47283	-2.15803	-3.10947	-1.05111	629.25	195.34	20.2175	-1.56	2.4336	-3.79642	5.8262	6.29448	6.53944	5.97693	35.3425	8.17054
2017-09-05 06:00:00	0.658468	-1.07911	-2.43589	-2.11356	-3.10211	-1.04193	629.23	194.7	21.5665	-1.58	2.4964	-3.94431	5.577	6.2049	6.51423	6.01237	35.3525	8.17082
2017-09-06 06:00:00	0.500341	-1.29248	-2.59751	-2.3406	-3.29845	-1.22553	629.22	194.7	23.4205	-1.59	2.5281	-4.01968	5.3412	6.178	6.53278	6.03213	35.3625	8.1711
2017-09-07 06:00:00	0.335134	-1.54141	-2.86304	-2.63083	-3.54877	-1.43437	628.67	195.83	22.0985	-2.14	4.5796	-9.80034	5.7956	6.32308	6.55825	6.05813	35.3725	8.17139
2017-09-08 06:00:00	0.330414	-1.59831	-3.03851	-2.76425	-3.60031	-1.42749	628.12	194.7	22.4415	-2.69	7.2361	-19.4651	6.1231	6.42035	6.57152	6.06585	35.3825	8.17167
2017-09-09 06:00:00	0.434258	-1.47503	-2.97155	-2.66828	-3.50214	-1.34258	627.92	194.74	22.8975	-2.89	8.3521	-24.1376	6.6598	6.49473	6.59498	6.09452	35.3925	8.17195
2017-09-10 06:00:00	0.443699	-1.47503	-2.99695	-2.69403	-3.51687	-1.35176	627.86	194.7	22.9915	-2.95	8.7025	-25.6724	7.1958	6.5749	6.61468	6.10787	35.4025	8.17224
2017-09-11 06:00:00	0.46966	-1.46555	-3.03389	-2.76425	-3.5635	-1.37471	627.58	194.7	23.2125	-3.23	10.4329	-33.6983	7.4808	6.67353	6.64773	6.13082	35.4125	8.17252
2017-09-12 06:00:00	0.389417	-1.55801	-3.13087	-2.8766	-3.61994	-1.43897	628.39	194.7	22.877	-2.42	5.8564	-14.1725	7.4392	6.6959	6.69255	6.14815	35.4225	8.1728
2017-09-13 06:00:00	0.47202	-1.43947	-3.02697	-2.76191	-3.53405	-1.36782	627.9	194.7	21.818	-2.91	8.4681	-24.6422	7.5949	6.70278	6.72878	6.15871	35.4325	8.17308
2017-09-14 06:00:00	0.582945	-1.30196	-2.84687	-2.55593	-3.41134	-1.25307	627.46	194.7	18.1585	-3.35	11.2225	-37.5954	7.4702	6.7365	6.74099	6.16894	35.4425	8.17336
2017-09-15 06:00:00	0.490901	-1.42762	-2.93461	-2.63551	-3.50214	-1.32651	627.11	194.7	20.37	-3.7	13.69	-50.653	6.5224	6.50945	6.66798	6.18781	35.4525	8.17365
2017-09-16 06:00:00	0.356375	-1.6315	-3.10547	-2.80872	-3.66903	-1.4711	626.6	195.52	19.81	-4.21	17.7241	-74.6185	5.9981	6.45793	6.66577	6.22977	35.4625	8.17393
2017-09-17 06:00:00	0.254891	-1.79509	-3.23246	-2.93277	-3.79665	-1.57896	626.44	195.93	17.589	-4.37	19.0969	-83.4535	5.3176	6.33153	6.62467	6.26412	35.4725	8.17421
2017-09-18 06:00:00	0.122725	-2.0298	-3.46335	-3.18088	-4.00525	-1.72813	625.45	195.75	19.6495	-5.36	28.7296	-153.991	4.26	6.1123	6.56725	6.27696	35.4825	8.17449
2017-09-19 06:00:00	0.094404	-2.06299	-3.4749	-3.1996	-4.01262	-1.76256	625.74	195.5	19.9945	-5.07	25.7049	-130.324	3.8263	5.94563	6.54665	6.29076	35.4925	8.17477
2017-09-20 06:00:00	0.061362	-2.10092	-3.49106	-3.2113	-4.04698	-1.79928	626	195.44	19.652	-4.81	23.1361	-111.285	4.1935	5.87218	6.52419	6.27781	35.5025	8.17505
2017-09-21 06:00:00	0.080243	-2.10092	-3.53031	-3.27216	-4.08134	-1.80157	625.56	195.69	21.618	-5.25	27.5625	-144.703	4.0499	5.7175	6.49603	6.27288	35.5125	8.17534
2017-09-22 06:00:00	0.077883	-2.127	-3.55571	-3.30493	-4.07397	-1.81994	625.96	195.42	22.437	-4.85	23.5225	-114.084	4.4115	5.74098	6.50404	6.27485	35.5225	8.17562
2017-09-23 06:00:00	0.143966	-2.02269	-3.48413	-3.1996	-3.99298	-1.74649	626.1	194.7	21.7095	-4.71	22.1841	-104.487	5.3811	5.83977	6.51768	6.29463	35.5325	8.1759
2017-09-24 06:00:00	0.297373	-1.79509	-3.24862	-2.93511	-3.76474	-1.57896	627.16	194.7	22.2925	-3.65	13.3225	-48.6271	5.7931	5.93735	6.5132	6.30711	35.5425	8.17618
2017-09-25 06:00:00	0.311533	-1.75242	-3.24631	-2.97724	-3.78438	-1.59044	627.2	194.7	22.714	-3.61	13.0321	-47.0459	6.25269	6.0411	6.53627	6.32124	35.5525	8.17646
2017-09-26 06:00:00	0.22421	-1.85673	-3.30404	-3.03342	-3.83101	-1.63634	628.1	194.7	21.3715	-2.71	7.3441	-19.9025	6.86509	6.09847	6.54558	6.33762	35.5625	8.17674
2017-09-27 06:00:00	0.134526	-1.99424	-3.44488	-3.2113	-3.96599	-1.7442	627.4	194.7	21.448	-3.41	11.6281	-39.6518	6.81579	5.99602	6.53251	6.35828	35.5725	8.17702
2017-09-28 06:00:00	0.094404	-2.06773	-3.49798	-3.26748	-4.00771	-1.79699	628	195.06	21.978	-2.81	7.8961	-22.188	6.61799	5.9635	6.52906	6.36946	35.5825	8.17731
2017-09-29 06:00:00	0.217129	-1.88518	-3.32251	-3.04746	-3.83346	-1.66847	628.46	194.7	19.9925	-2.35	5.5225	-12.9779	6.6717	5.94032	6.50251	6.37619	35.5925	8.17759
2017-09-30 06:00:00	0.46494	-1.50585	-2.90691	-2.59572	-3.48496	-1.38847	628.72	194.7	20.078	-2.09	4.3681	-9.12933	6.2117	5.79507	6.45844	6.38796	35.6025	8.17787
2017-10-01 06:00:00	0.4791	-1.48214	-2.87458	-2.56764	-3.48742	-1.37011	628.24	195.02	20.335	-2.57	6.6049	-16.9746	5.6845	5.6494	6.41872	6.37701	35.6125	8.17815
2017-10-02 06:00:00	0.415377	-1.55801	-2.91614	-2.61913	-3.54141	-1.4229	628.47	194.7	21.5515	-2.34	5.4756	-12.8129	5.4772	5.50552	6.38182	6.35836	35.6225	8.17843
2017-10-03 06:00:00	0.332774	-1.69552	-3.04313	-2.76659	-3.67148	-1.53076	628.52	194.7	22.2455	-2.29	5.2441	-12.009	5.4979	5.43925	6.36116	6.34954	35.6325	8.17871
2017-10-04 06:00:00	0.519222	-1.41102	-2.73143	-2.43891	-3.41625	-1.3334	628.78	194.7	18.677	-2.03	4.1209	-8.36543	5.5514	5.46062	6.34117	6.3581	35.6425	8.17899
2017-10-05 06:00:00	0.679709	-1.20239	-2.46821	-2.15101	-3.20028	-1.15898	628.36	194.7	17.4645	-2.45	6.0025	-14.7061	5.2883	5.48655	6.26932	6.32418	35.6525	8.17927
2017-10-06 06:00:00	0.741071	-1.11704	-2.31352	-1.97547	-3.11438	-1.11078	628.64	194.7	19.9525	-2.17	4.7089	-10.2183	4.7656	5.34127	6.16795	6.29097	35.6625	8.17955
2017-10-07 06:00:00	0.656108	-1.21424	-2.362	-2.03398	-3.19782	-1.16816	628.95	194.7	20.851	-1.86	3.4596	-6.43486	4.6891	5.3484	6.11322	6.26941	35.6725	8.17983
2017-10-08 06:00:00	0.752872	-1.05777	-2.18191	-1.84205	-3.05057	-1.06717	629.22	194.7	19.6685	-1.59	2.5281	-4.01968	4.549	5.5115	6.06515	6.26439	35.6825	8.18011
2017-10-09 06:00:00	0.811874	-0.981905	-2.04799	-1.69459	-2.9794	-1.01439	629.46	194.7	20.984	-1.35	1.8225	-2.46037	4.0336	5.51245	6.01502	6.24922	35.6925	8.18039
2017-10-10 06:00:00	0.880317	-0.863365	-1.93024	-1.58693	-2.88614	-0.94554	629.54	194.7	21.6815	-1.27	1.6129	-2.04838	4.495	5.56192	5.98957	6.2411	35.7025	8.18067
2017-10-11 06:00:00	0.882677	-0.863365	-1.93717	-1.60097	-2.90086	-0.94095	629.11	194.7	19.037	-1.7	2.89	-4.913	5.33839	5.6634	5.98322	6.24857	35.7125	8.18095
2017-10-12 06:00:00	0.755232	-1.06251	-2.09186	-1.75077	-3.04812	-1.0534	629.18	194.7	18.929	-1.63	2.6569	-4.33075	5.15529	5.53435	5.92443	6.23206	35.7225	8.18123
2017-10-13 06:00:00	0.71983	-1.08385	-2.05723	-1.718	-3.06284	-1.09472	629.62	194.7	17.9725	-1.19	1.4161	-1.68516	4.77089	5.35895	5.86884	6.21235	35.7325	8.18151
2017-10-14 06:00:00	0.880317	-0.870478	-1.79863	-1.42074	-2.84687	-0.920295	629.82	194.7	16.519	-0.99	0.9801	-0.970299	4.43169	5.1721	5.80131	6.17776	35.7425	8.18179
2017-10-15 06:00:00	1.05733	-0.604948	-1.44537	-1.04157	-2.56955	-0.72063	630.11	194.7	16.7425	-0.7	0.49	-0.343	3.5387	4.88342	5.70981	6.11087	35.7525	8.18207
2017-10-16 06:00:00	1.16589	-0.455588	-1.20755	-0.772398	-2.37321	-0.566865	630.61	194.7	18.6595	-0.2	0.04	-0.008	2.5509	4.58485	5.62044	6.06909	35.7625	8.18235
2017-10-17 06:00:00	1.23669	-0.348902	-1.06671	-0.620259	-2.27504	-0.49572	630.82	194.7	18.6995	0.01	0.0001	1e-06	2.4754	4.44925	5.58945	6.02891	35.7725	8.18263
2017-10-18 06:00:00	1.30278	-0.268294	-0.955885	-0.503229	-2.18669	-0.42687	630.9	194.7	17.956	0.09	0.0081	0.000729	2.42951	4.31182	5.56522	6.00297	35.7825	8.18291
2017-10-19 06:00:00	1.32638	-0.149754	-0.854293	-0.421308	-2.14252	-0.37179	630.93	194.7	17.7905	0.12	0.0144	0.001728	2.42621	4.11072	5.51526	5.97042	35.7925	8.18319
2017-10-20 06:00:00	1.33346	-0.10708	-0.766555	-0.325343	-2.09834	-0.351135	631.2	194.7	16.764	0.39	0.1521	0.059319	2.6805	4.00062	5.45687	5.93096	35.8025	8.18347
2017-10-21 06:00:00	1.41842	0.009089	-0.607241	-0.159161	-1.95845	-0.240975	631.15	194.7	11.2825	0.34	0.1156	0.039304	2.6848	3.83492	5.38595	5.88009	35.8125	8.18375
2017-10-22 06:00:00	1.44202	0.051764	-0.464089	-0.016384	-1.90446	-0.19737	631.01	195.5	10.8705	0.2	0.04	0.008	1.2094	3.3823	5.19457	5.77059	35.8225	8.18403
2017-10-23 06:00:00	1.39954	-0.035956	-0.450235	-0.009362	-1.97563	-0.259335	630.87	194.7	9.02299	0.06	0.0036	0.000216	-0.356399	2.84825	4.99676	5.65117	35.8325	8.1843
2017-10-24 06:00:00	1.38066	-0.083372	-0.413293	0.03745	-1.98299	-0.277695	631.04	194.7	9.461	0.23	0.0529	0.012167	-2.143	2.18712	4.79475	5.50722	35.8425	8.18458
2017-10-25 06:00:00	1.40898	-0.038327	-0.260906	0.191929	-1.929	-0.245565	631.24	194.7	8.78749	0.43	0.1849	0.079507	-3.8089	1.72632	4.57411	5.38003	35.8525	8.18486
2017-10-26 06:00:00	1.4137	-0.040698	-0.175476	0.278531	-1.91918	-0.25704	631.21	194.7	11.6545	0.4	0.16	0.064	-5.4042	1.29247	4.36389	5.23149	35.8625	8.18514
2017-10-27 06:00:00	1.40898	-0.040698	-0.161623	0.287894	-1.92409	-0.263925	631.15	195.01	11.752	0.34	0.1156	0.039304	-5.3298	0.877574	4.18583	5.11482	35.8725	8.18542
2017-10-28 06:00:00	1.37122	-0.097597	-0.177785	0.264488	-1.95845	-0.28458	631.18	194.7	12.8845	0.37	0.1369	0.050653	-5.1535	0.422624	4.01547	5.00478	35.8825	8.1857
2017-10-29 06:00:00	1.34526	-0.133159	-0.18933	0.243422	-1.98054	-0.309825	631.16	194.7	9.97199	0.35	0.1225	0.042875	-4.3812	0.0834244	3.84717	4.88604	35.8925	8.18598
2017-10-30 06:00:00	1.32402	-0.190058	-0.191639	0.248104	-1.99281	-0.323595	631.16	194.7	8.37251	0.35	0.1225	0.042875	-4.279	-0.467176	3.65564	4.74533	35.9025	8.18626
2017-10-31 06:00:00	1.3783	-0.133159	-0.032325	0.414286	-1.92164	-0.26163	631.16	194.7	5.88651	0.35	0.1225	0.042875	-4.362	-1.13262	3.41609	4.58879	35.9125	8.18653
2017-11-01 06:00:00	1.44674	-0.050181	0.152387	0.617918	-1.82102	-0.181305	631.18	194.7	7.26199	0.37	0.1369	0.050653	-5.5156	-1.79015	3.16172	4.40365	35.9225	8.18681
2017-11-02 06:00:00	1.47978	-0.005136	0.25167	0.713883	-1.79402	-0.17901	631.15	194.76	10.107	0.34	0.1156	0.039304	-6.4136	-2.3735	2.94174	4.2311	35.9325	8.18709
2017-11-03 06:00:00	1.45146	-0.043068	0.228581	0.690477	-1.79893	-0.208845	631.94	194.7	10.244	1.13	1.2769	1.4429	-6.9691	-2.76677	2.78089	4.0829	35.9425	8.18737
2017-11-04 06:00:00	1.47742	0.006718	0.300157	0.763036	-1.72776	-0.162945	632.26	194.8	8.33699	1.45	2.1025	3.04863	-6.9147	-3.08052	2.61467	3.9413	35.9525	8.18765
2017-11-05 06:00:00	1.54587	0.108663	0.46178	0.924537	-1.61977	-0.05967	632.01	195.64	6.04751	1.2	1.44	1.728	-6.9218	-3.5008	2.39417	3.7723	35.9625	8.18792
2017-11-06 06:00:00	1.63319	0.196382	0.625712	1.12583	-1.49461	0.029835	631.96	194.7	13.1745	1.15	1.3225	1.52088	-6.8896	-4.1314	2.10462	3.58132	35.9725	8.1882
2017-11-07 06:00:00	1.64027	0.231944	0.618785	1.11647	-1.4897	0.020655	631.94	194.7	16.6215	1.13	1.2769	1.4429	-5.7071	-4.40765	1.95589	3.46398	35.9825	8.18848
2017-11-08 06:00:00	1.64263	0.234315	0.586461	1.06263	-1.4897	0.03213	631.4	194.7	16.542	0.59	0.3481	0.205379	-4.4042	-4.47438	1.85889	3.3967	35.9925	8.18876
2017-11-09 06:00:00	1.66859	0.246169	0.595696	1.072	-1.48234	0.05508	630.8	194.7	12.3195	-0.01	0.0001	-1e-06	-3.1446	-4.5368	1.75297	3.33038	36.0025	8.18904
2017-11-10 06:00:00	1.64499	0.22009	0.5449	1.03689	-1.54369	0.011475	630.16	194.7	14.952	-0.65	0.4225	-0.274625	-2.34809	-4.75902	1.5751	3.22212	36.0125	8.18931
2017-11-11 06:00:00	1.60959	0.177416	0.466398	0.915175	-1.63204	-0.05049	629.7	195.54	15.6745	-1.11	1.2321	-1.36763	-0.567195	-4.57555	1.43742	3.13754	36.0225	8.18959
2017-11-12 06:00:00	1.64263	0.212978	0.521811	0.97603	-1.57069	0.011475	629.43	194.7	12.118	-1.38	1.9044	-2.62807	-0.0671954	-4.33535	1.31738	3.06432	36.0325	8.18987
2017-11-13 06:00:00	1.67803	0.212978	0.586461	1.08136	-1.51424	0.06426	629.26	194.8	13.587	-1.55	2.4025	-3.72387	-0.967895	-4.1806	1.15572	2.95425	36.0425	8.19015
2017-11-14 06:00:00	1.62139	0.16082	0.466398	0.947943	-1.64186	-0.011475	628.6	194.7	15.268	-2.21	4.8841	-10.7939	-1.55889	-3.9743	1.07952	2.86067	36.0525	8.19042
2017-11-15 06:00:00	1.64263	0.172674	0.471016	0.954965	-1.62713	0.006885	628.05	194.7	15.0195	-2.76	7.6176	-21.0246	-0.969196	-3.65027	0.994491	2.78471	36.0625	8.1907
2017-11-16 06:00:00	1.65915	0.167933	0.487178	0.980711	-1.60996	0.02754	627.66	194.7	14.5655	-3.15	9.9225	-31.2559	-0.955695	-3.48202	0.91465	2.72361	36.0725	8.19098
2017-11-17 06:00:00	1.63791	0.144225	0.427146	0.882406	-1.69585	-0.029835	627.03	194.7	15.8375	-3.78	14.2884	-54.0102	-1.1775	-3.34135	0.864258	2.66152	36.0825	8.19126
2017-11-18 06:00:00	1.62847	0.132371	0.327864	0.765376	-1.75721	-0.066555	626.43	194.7	16.216	-4.38	19.1844	-84.0277	-0.433597	-3.1937	0.800725	2.60467	36.0925	8.19153
2017-11-19 06:00:00	1.64971	0.096809	0.436382	0.908153	-1.71058	-0.002295	625.59	195.64	7.011	-5.22	27.2484	-142.237	0.0922018	-2.8815	0.73775	2.54825	36.1025	8.19181
2017-11-20 06:00:00	1.70871	0.106292	0.598005	1.0954	-1.64186	0.075735	624.92	195.28	8.57101	-5.89	34.6921	-204.336	-1.5592	-2.94957	0.527067	2.39261	36.1125	8.19209
2017-11-21 06:00:00	1.74647	0.096809	0.704215	1.21009	-1.62223	0.103275	624.09	194.78	8.507	-6.72	45.1584	-303.464	-2.8489	-2.81535	0.309617	2.23489	36.1225	8.19236
2017-11-22 06:00:00	1.76536	0.087326	0.764246	1.26626	-1.64186	0.098685	622.86	195.44	10.796	-7.95	63.2025	-502.46	-4.0606	-2.7531	0.0774501	2.07676	36.1325	8.19264
2017-11-23 06:00:00	1.69927	-0.007506	0.704215	1.19605	-1.75721	0.025245	622.07	194.8	6.72601	-8.74	76.3876	-667.628	-5.0689	-2.71865	-0.104441	1.96178	36.1425	8.19292
2017-11-24 06:00:00	1.65443	-0.066776	0.681125	1.1586	-1.81856	-0.01836	621.24	195.72	7.62599	-9.57	91.5849	-876.467	-6.9669	-2.89455	-0.363883	1.7843	36.1525	8.19319
2017-11-25 06:00:00	1.67567	-0.088114	0.741157	1.23116	-1.82102	0.00459	620.09	195.73	4.707	-10.72	114.918	-1231.93	-6.8439	-2.9301	-0.615349	1.63125	36.1625	8.19347
2017-11-26 06:00:00	1.72287	-0.090484	0.817351	1.30137	-1.83574	0.01836	618.29	195.76	9.64601	-12.52	156.75	-1962.52	-7.6167	-2.99712	-0.893091	1.43535	36.1725	8.19375
2017-11-27 06:00:00	1.73231	-0.118934	0.803497	1.28031	-1.86765	-0.002295	616.88	195.3	8.39851	-13.93	194.045	-2703.05	-7.3889	-3.17355	-1.08979	1.29838	36.1825	8.19402
2017-11-28 06:00:00	1.59779	-0.296744	0.540283	0.980711	-2.06398	-0.15606	615.88	194.7	12.703	-14.93	222.905	-3327.97	-7.8684	-3.5847	-1.31612	1.13633	36.1925	8.1943
2017-11-29 06:00:00	1.56239	-0.337048	0.281686	0.676433	-2.18669	-0.26163	615.34	194.7	16.3185	-15.47	239.321	-3702.29	-6.673	-3.77665	-1.43761	1.03899	36.2025	8.19457
2017-11-30 06:00:00	1.56003	-0.327564	0.187021	0.578128	-2.19406	-0.26622	615.41	194.7	14.28	-15.4	237.16	-3652.26	-4.9345	-3.5767	-1.50027	0.967578	36.2125	8.19485
2017-12-01 06:00:00	1.55059	-0.370239	0.25167	0.683455	-2.1646	-0.231795	615.75	194.7	9.05049	-15.06	226.804	-3415.66	-3.0199	-3.6103	-1.60118	0.891261	36.2225	8.19513
2017-12-02 06:00:00	1.53879	-0.40343	0.422529	0.887087	-2.09589	-0.1836	617.06	194.7	8.826	-13.75	189.062	-2599.61	-3.139	-3.9415	-1.80953	0.764478	36.2325	8.1954
2017-12-03 06:00:00	1.55531	-0.405801	0.505649	0.990074	-2.04435	-0.15606	617.71	194.85	10.493	-13.1	171.61	-2248.09	-3.0535	-4.1061	-2.03319	0.643011	36.2425	8.19568
2017-12-04 06:00:00	1.56475	-0.389205	0.533356	1.01582	-2.0149	-0.15147	618.09	194.7	11.946	-12.72	161.798	-2058.08	-3.4955	-4.2608	-2.16959	0.534961	36.2525	8.19595
2017-12-05 06:00:00	1.53879	-0.377351	0.540283	1.00646	-2.04189	-0.167535	618.3	194.7	7.1165	-12.51	156.5	-1957.82	-4.37	-4.4269	-2.26157	0.428067	36.2625	8.19623
2017-12-06 06:00:00	1.47978	-0.427138	0.563372	1.01816	-2.06644	-0.199665	618.63	194.7	3.40449	-12.18	148.352	-1806.93	-5.8027	-4.82205	-2.4755	0.246911	36.2725	8.19651
2017-12-07 06:00:00	1.47506	-0.429509	0.708832	1.18434	-2.03944	-0.17442	618.98	194.7	2.46699	-11.83	139.949	-1655.6	-6.9319	-5.3801	-2.76627	0.0392002	36.2825	8.19678
2017-12-08 06:00:00	1.4373	-0.443734	0.741157	1.20073	-2.0468	-0.21573	619.5	194.7	7.28799	-11.31	127.916	-1446.73	-8.2037	-6.04862	-3.05297	-0.182739	36.2925	8.19706
2017-12-09 06:00:00	1.4019	-0.474554	0.849675	1.28499	-2.06153	-0.2295	619.82	194.7	-1.136	-10.99	120.78	-1327.37	-8.8447	-6.49502	-3.28123	-0.356178	36.3025	8.19733
2017-12-10 06:00:00	1.4019	-0.479296	0.981283	1.42074	-2.05171	-0.231795	620.34	194.7	1.45101	-10.47	109.621	-1147.73	-11.4611	-6.90237	-3.66152	-0.624261	36.3125	8.19761
2017-12-11 06:00:00	1.3783	-0.484037	1.00206	1.43245	-2.06398	-0.259335	620.66	194.7	0.677006	-10.15	103.022	-1045.68	-12.5942	-7.25837	-3.95462	-0.866055	36.3225	8.19788
2017-12-12 06:00:00	1.3547	-0.495891	1.08287	1.54245	-2.02472	-0.26622	621.26	194.7	5.27351	-9.55	91.2025	-870.984	-13.1397	-7.64987	-4.25882	-1.11272	36.3325	8.19816
2017-12-13 06:00:00	1.38538	-0.49352	1.23295	1.72502	-1.94618	-0.199665	621.46	194.7	6.21101	-9.35	87.4225	-817.4	-12.5784	-7.926	-4.47047	-1.29655	36.3425	8.19843
2017-12-14 06:00:00	1.42314	-0.49352	1.34378	1.87014	-1.87746	-0.14688	621.51	194.7	6.2065	-9.3	86.49	-804.357	-12.7938	-7.95175	-4.64227	-1.4293	36.3525	8.19871
2017-12-15 06:00:00	1.44438	-0.479296	1.4015	1.94972	-1.79157	-0.112455	621.58	194.7	8.0095	-9.23	85.1929	-786.33	-11.3253	-8.02272	-4.81787	-1.58667	36.3625	8.19898
2017-12-16 06:00:00	1.45618	-0.467442	1.38996	1.95908	-1.77439	-0.10557	621.67	194.7	9.19549	-9.14	83.5396	-763.552	-10.0136	-7.8576	-4.99537	-1.71779	36.3725	8.19926
2017-12-17 06:00:00	1.4727	-0.457958	1.54235	2.14165	-1.74003	-0.02754	621.74	194.7	2.18351	-9.07	82.2649	-746.143	-8.3099	-7.88012	-5.15377	-1.81105	36.3825	8.19953
2017-12-18 06:00:00	1.53171	-0.308598	1.87252	2.41316	-1.62959	0.03213	621.8	194.7	3.1965	-9.01	81.1801	-731.433	-8.9279	-8.19087	-5.41665	-2.00512	36.3925	8.19981
2017-12-19 06:00:00	1.54823	-0.261182	1.98565	2.5138	-1.59523	0.052785	621.85	194.7	-1.113	-8.96	80.2816	-719.323	-9.5308	-8.6662	-5.65988	-2.19176	36.4025	8.20008
2017-12-20 06:00:00	1.56003	-0.204283	2.17037	2.68701	-1.52651	0.0918	622.52	194.7	-1.764	-8.29	68.7241	-569.723	-10.9947	-9.53777	-5.95783	-2.42248	36.4125	8.20036
2017-12-21 06:00:00	1.57419	-0.133159	2.31814	2.81574	-1.47007	0.112455	623.19	194.7	-2.30651	-7.62	58.0644	-442.451	-12.9494	-10.34	-6.17527	-2.68228	36.4225	8.20063
2017-12-22 06:00:00	1.56947	-0.123676	2.42665	2.92107	-1.45043	0.13311	623.23	194.7	-1.5895	-7.58	57.4564	-435.52	-15.2498	-10.9078	-6.39489	-2.95721	36.4325	8.20091
2017-12-23 06:00:00	1.54587	-0.121305	2.39433	2.88362	-1.46025	0.08721	623.27	194.7	8.52201	-7.54	56.8516	-428.661	-16.0044	-11.4286	-6.57177	-3.21609	36.4425	8.20118
2017-12-24 06:00:00	1.58599	-0.07863	2.32968	2.8251	-1.42589	0.10098	623.33	194.7	11.832	-7.48	55.9504	-418.509	-14.9393	-11.5271	-6.58742	-3.36909	36.4525	8.20145
2017-12-25 06:00:00	1.55295	-0.090484	2.27196	2.77127	-1.47007	0.08262	623.36	194.7	0.295002	-7.45	55.5025	-413.494	-12.3503	-11.5328	-6.53667	-3.49	36.4625	8.20173
2017-12-26 06:00:00	1.53407	-0.104709	2.35277	2.83681	-1.47497	0.080325	623.4	194.7	-0.849503	-7.41	54.9081	-406.869	-11.9385	-11.8739	-6.726	-3.72419	36.4725	8.202
2017-12-27 06:00:00	1.52934	-0.104709	2.37355	2.85787	-1.45534	0.061965	623.44	194.7	2.7395	-7.37	54.3169	-400.316	-11.6471	-12.0866	-6.93602	-3.97194	36.4825	8.20228
2017-12-28 06:00:00	1.53642	-0.095226	2.36431	2.86021	-1.44307	0.057375	623.48	194.7	8.18851	-7.33	53.7289	-393.833	-10.7813	-12.073	-7.10511	-4.1857	36.4925	8.20255
2017-12-29 06:00:00	1.57183	-0.07626	2.34123	2.85553	-1.41117	0.08262	623.53	194.7	9.66649	-7.28	52.9984	-385.828	-10.848	-12.028	-7.13483	-4.31685	36.5025	8.20282
2017-12-30 06:00:00	1.58363	-0.052552	2.26041	2.76191	-1.42098	0.071145	623.57	194.7	9.68	-7.24	52.4176	-379.503	-11.2811	-11.4878	-7.11327	-4.43254	36.5125	8.2031
2017-12-31 06:00:00	1.59307	-0.043068	2.20038	2.7268	-1.41607	0.080325	623.61	194.7	8.798	-7.2	51.84	-373.248	-9.4041	-11.0764	-7.05004	-4.55093	36.5225	8.20337
2018-01-01 06:00:00	1.61195	-0.040698	2.29043	2.83447	-1.36454	0.1377	623.64	194.7	1.85849	-7.17	51.4089	-368.602	-7.4746	-10.6703	-7.02444	-4.69263	36.5325	8.20365
2018-01-02 06:00:00	1.61431	-0.031214	2.33199	2.89064	-1.34981	0.15606	623.68	194.7	7.26051	-7.13	50.8369	-362.467	-7.6508	-10.8411	-7.16192	-4.91915	36.5425	8.20392
2018-01-03 06:00:00	1.62847	-0.012248	2.26503	2.81808	-1.34981	0.14688	623.72	194.7	11.1595	-7.09	50.2681	-356.401	-7.8364	-10.7886	-7.21164	-5.046	36.5525	8.20419
2018-01-04 06:00:00	1.64735	0.001977	2.18653	2.72446	-1.34736	0.149175	623.77	194.7	9.859	-7.04	49.5616	-348.914	-7.5378	-10.541	-7.1646	-5.11606	36.5625	8.20447
2018-01-05 06:00:00	1.65915	0.018572	2.17729	2.72212	-1.32527	0.17901	623.81	194.7	10.89	-7	49	-343	-7.502	-10.4485	-7.10107	-5.22821	36.5725	8.20474
2018-01-06 06:00:00	1.65915	0.006718	2.18422	2.7502	-1.313	0.195075	623.86	194.7	5.73699	-6.95	48.3025	-335.702	-7.0836	-10.3638	-7.13915	-5.33889	36.5825	8.20501
2018-01-07 06:00:00	1.68039	0.023314	2.26503	2.86021	-1.24673	0.26622	623.97	194.7	9.908	-6.84	46.7856	-320.014	-6.3079	-10.1861	-7.32056	-5.49368	36.5925	8.20529
2018-01-08 06:00:00	1.69455	0.035168	2.18191	2.76191	-1.23692	0.254745	624.17	194.7	11.3735	-6.64	44.0896	-292.755	-5.7784	-9.85053	-7.43112	-5.61675	36.6025	8.20556
2018-01-09 06:00:00	1.68983	0.080213	2.39202	3.0264	-1.17802	0.355725	624.48	194.88	0.096504	-6.33	40.0689	-253.636	-5.7356	-9.2262	-7.44689	-5.73128	36.6125	8.20583
2018-01-10 06:00:00	1.77716	0.182158	2.67832	3.28854	-1.07739	0.456705	624.58	194.7	-0.033005	-6.23	38.8129	-241.804	-7.6881	-9.13318	-7.69448	-5.94173	36.6225	8.20611
2018-01-11 06:00:00	1.80784	0.24854	2.84687	3.45239	-1.01604	0.507195	624.64	194.7	-1.71401	-6.17	38.0689	-234.885	-9.8727	-9.0195	-7.95627	-6.15242	36.6325	8.20638
2018-01-12 06:00:00	1.8456	0.317293	3.04313	3.63261	-0.947321	0.548505	624.7	194.7	-4.13899	-6.11	37.3321	-228.099	-11.3629	-9.02573	-8.18681	-6.37116	36.6425	8.20665
2018-01-13 06:00:00	1.85976	0.388417	3.25324	3.83624	-0.866333	0.598995	625.1	194.7	-2.24049	-5.71	32.6041	-186.169	-14.1723	-9.65878	-8.48224	-6.60069	36.6525	8.20692
2018-01-14 06:00:00	1.88808	0.452429	3.44488	4.03988	-0.78289	0.63801	625.3	194.7	-0.136993	-5.51	30.3601	-167.284	-16.8951	-10.3624	-8.77405	-6.81162	36.6625	8.2072
2018-01-15 06:00:00	1.91876	0.492732	3.50953	4.1218	-0.692084	0.681615	626.15	194.7	6.63301	-4.66	21.7156	-101.195	-16.9418	-10.384	-9.02666	-7.02047	36.6725	8.20747
2018-01-16 06:00:00	1.93764	0.540148	3.44488	4.03754	-0.679813	0.663255	626.19	194.7	8.278	-4.62	21.3444	-98.6111	-15.6086	-10.0099	-9.15887	-7.15454	36.6825	8.20774
2018-01-17 06:00:00	1.93764	0.57571	3.29711	3.88774	-0.711718	0.63342	626.24	194.7	6.352	-4.57	20.8849	-95.444	-13.6102	-9.73295	-9.28486	-7.26207	36.6925	8.20802
2018-01-18 06:00:00	1.86212	0.554373	3.12856	3.68879	-0.755894	0.585225	626.62	194.7	9.1015	-4.19	17.5561	-73.5601	-11.512	-9.82478	-9.44926	-7.38917	36.7025	8.20829
2018-01-19 06:00:00	1.87156	0.589935	3.04313	3.58112	-0.748531	0.576045	626.82	194.7	11.1855	-3.99	15.9201	-63.5212	-9.2436	-9.85302	-9.41442	-7.4743	36.7125	8.20856
2018-01-20 06:00:00	1.822	0.559115	2.88151	3.41962	-0.800069	0.51867	627.03	194.7	10.258	-3.78	14.2884	-54.0102	-6.9791	-9.77775	-9.37084	-7.47538	36.7225	8.20883
2018-01-21 06:00:00	1.82436	0.570969	2.8538	3.38217	-0.78289	0.543915	627.2	194.7	9.749	-3.61	13.0321	-47.0459	-6.2541	-9.70475	-9.34166	-7.48219	36.7325	8.2091
2018-01-22 06:00:00	1.8574	0.592306	2.82378	3.38217	-0.726443	0.603585	627.42	194.7	9.10199	-3.39	11.4921	-38.9582	-5.9599	-9.31022	-9.35911	-7.47412	36.7425	8.20938
2018-01-23 06:00:00	1.81256	0.570969	2.73605	3.28854	-0.76571	0.55998	627.62	194.7	7.357	-3.19	10.1761	-32.4618	-5.4099	-9.21815	-9.31951	-7.47811	36.7525	8.20965
2018-01-24 06:00:00	2.03441	0.895768	3.17012	3.70985	-0.478569	0.846855	627.66	194.7	7.4295	-3.15	9.9225	-31.2559	-5.7588	-9.40827	-9.32399	-7.494	36.7625	8.20992
2018-01-25 06:00:00	2.11937	0.945555	3.38485	3.97434	-0.331317	1.00751	627.93	194.7	3.7285	-2.88	8.2944	-23.8879	-6.51	-9.52975	-9.27862	-7.54095	36.7725	8.21019
2018-01-26 06:00:00	2.17365	0.974005	3.52107	4.14286	-0.240512	1.08783	628.03	194.7	4.181	-2.78	7.7284	-21.485	-7.8159	-9.88783	-9.37724	-7.6301	36.7825	8.21046
2018-01-27 06:00:00	2.23974	1.02142	3.74965	4.40033	-0.142344	1.19799	628.03	194.7	1.9325	-2.78	7.7284	-21.485	-8.9295	-9.96563	-9.44753	-7.7268	36.7925	8.21074
2018-01-28 06:00:00	2.27986	1.06884	3.86048	4.5314	-0.058901	1.26684	628.14	194.7	7.9865	-2.67	7.1289	-19.0342	-10.3634	-10.3644	-9.62704	-7.81613	36.8025	8.21101
2018-01-29 06:00:00	2.30582	1.09729	3.93667	4.60864	-0.031905	1.31045	628.09	194.7	1.8345	-2.72	7.3984	-20.1236	-10.2375	-10.5337	-9.76591	-7.82042	36.8125	8.21128
2018-01-30 06:00:00	2.3601	1.14944	4.14909	4.86377	0.080989	1.43667	628.29	194.7	0.498993	-2.52	6.3504	-16.003	-11.3565	-10.4469	-9.97333	-7.86544	36.8225	8.21155
2018-01-31 06:00:00	2.57723	1.50032	4.64551	5.33189	0.33868	1.64552	627.98	194.7	1.96599	-2.83	8.0089	-22.6652	-12.0024	-10.4203	-10.1159	-7.94059	36.8325	8.21182
2018-02-01 06:00:00	2.60083	1.53825	4.75633	5.47466	0.390218	1.71436	628.02	194.7	0.987999	-2.79	7.7841	-21.7176	-12.4454	-10.2363	-10.2302	-8.03104	36.8425	8.21209
2018-02-02 06:00:00	2.72828	1.77771	5.09343	5.76022	0.574283	1.82452	628.26	194.7	1.28801	-2.55	6.5025	-16.5814	-12.6343	-9.9799	-10.3886	-8.13389	36.8525	8.21236
2018-02-03 06:00:00	2.76604	1.83461	5.17886	5.87491	0.652817	1.92551	628.5	194.7	1.298	-2.31	5.3361	-12.3264	-13.974	-9.80348	-10.5662	-8.21221	36.8625	8.21264
2018-02-04 06:00:00	2.81088	1.87491	5.28507	6.00364	0.716626	1.98747	628.5	194.7	-2.5035	-2.31	5.3361	-12.3264	-14.0813	-9.73173	-10.6632	-8.26498	36.8725	8.21291
2018-02-05 06:00:00	2.82504	1.94129	5.38897	6.10663	0.758348	2.03107	628.6	194.7	-2.7205	-2.21	4.8841	-10.7939	-14.6818	-10.1886	-10.7617	-8.43918	36.8825	8.21318
2018-02-06 06:00:00	2.851	2.05746	5.53212	6.2377	0.82952	2.07468	628.66	194.7	-6.0295	-2.15	4.6225	-9.93837	-15.6191	-10.7385	-10.8481	-8.65409	36.8925	8.21345
2018-02-07 06:00:00	2.82268	2.04324	5.57137	6.24706	0.824611	2.0655	628.7	194.7	-3.35101	-2.11	4.4521	-9.39393	-17.0226	-11.3576	-11.0701	-8.90489	36.9025	8.21372
2018-02-08 06:00:00	2.8038	2.04561	5.54367	6.20493	0.807432	2.0196	628.76	194.7	0.489494	-2.05	4.2025	-8.61512	-17.9504	-11.9802	-11.107	-9.079	36.9125	8.21399
2018-02-09 06:00:00	2.733	1.99582	5.40052	6.08322	0.738714	1.95534	628.82	194.7	0.489494	-1.99	3.9601	-7.8806	-18.1121	-12.515	-11.123	-9.2397	36.9225	8.21426
2018-02-10 06:00:00	2.77076	2.0219	5.39359	6.08088	0.792707	1.99436	628.91	194.7	0.489494	-1.9	3.61	-6.859	-17.5135	-13.0034	-11.1262	-9.40842	36.9325	8.21453
2018-02-11 06:00:00	2.77312	2.01953	5.33356	6.01768	0.809886	2.00124	628.97	194.73	0.489494	-1.84	3.3856	-6.2295	-16.8715	-13.4664	-11.2059	-9.53763	36.9425	8.2148
2018-02-12 06:00:00	2.76132	2.01004	5.32894	6.02705	0.797615	2.01042	628.98	194.74	0.489494	-1.83	3.3489	-6.12849	-15.5677	-13.897	-11.3013	-9.68316	36.9525	8.21507
2018-02-13 06:00:00	2.72592	1.99345	5.29431	5.97321	0.741168	1.95304	628.65	195.72	0.489494	-2.16	4.6656	-10.0777	-14.7996	-14.2404	-11.3965	-9.84736	36.9625	8.21534
2018-02-14 06:00:00	2.65511	1.9081	5.20426	5.87725	0.657726	1.87272	628.59	194.7	0.489494	-2.22	4.9284	-10.941	-14.7996	-14.5874	-11.5219	-10.0088	36.9725	8.21562
2018-02-15 06:00:00	2.55363	1.83935	4.97568	5.60808	0.544832	1.73961	628.7	194.7	0.489494	-2.11	4.4521	-9.39393	-14.7996	-14.7493	-11.667	-10.1652	36.9825	8.21589
2018-02-16 06:00:00	2.47574	1.77771	4.71708	5.32018	0.456481	1.64552	628.87	194.7	0.489494	-1.94	3.7636	-7.30138	-14.7996	-14.9339	-11.6952	-10.3357	36.9925	8.21616
2018-02-17 06:00:00	2.41438	1.70658	4.44232	5.04399	0.350951	1.52847	628.96	194.7	0.489494	-1.85	3.4225	-6.33162	-14.7996	-15.0061	-11.7403	-10.5105	37.0025	8.21643
2018-02-18 06:00:00	2.39786	1.66154	4.3846	5.01122	0.363222	1.5606	629.02	194.7	0.489494	-1.79	3.2041	-5.73534	-14.7996	-15.3809	-11.7136	-10.5829	37.0125	8.2167
2018-02-19 06:00:00	2.37898	1.64257	4.24838	4.84738	0.309229	1.51011	629.11	194.7	0.489494	-1.7	2.89	-4.913	-14.7996	-15.4482	-11.6761	-10.6727	37.0225	8.21697
2018-02-20 06:00:00	2.31526	1.58567	4.02672	4.57821	0.208607	1.38618	629.21	194.7	0.489494	-1.6	2.56	-4.096	-14.7996	-15.4486	-11.6295	-10.7618	37.0325	8.21724
2018-02-21 06:00:00	2.3365	1.59753	3.98054	4.56417	0.225786	1.44126	629.08	194.7	0.489494	-1.73	2.9929	-5.17772	-14.7996	-15.5225	-11.5948	-10.8763	37.0425	8.21751
2018-02-22 06:00:00	2.39314	1.61412	4.05212	4.65779	0.299412	1.52158	628.95	195.64	0.489494	-1.86	3.4596	-6.43486	-14.7996	-15.5474	-11.7287	-10.9456	37.0525	8.21778
2018-02-23 06:00:00	2.44034	1.60938	4.13293	4.7444	0.319046	1.57207	628.54	194.7	0.489494	-2.27	5.1529	-11.6971	-14.7996	-15.5873	-11.9177	-11.0249	37.0625	8.21805
2018-02-24 06:00:00	2.43326	1.63072	4.14678	4.74206	0.294504	1.5147	628.41	195.51	0.489494	-2.4	5.76	-13.824	-14.7996	-15.6277	-11.9145	-11.0718	37.0725	8.21832
2018-02-25 06:00:00	2.44978	1.6402	4.10061	4.68354	0.314138	1.52158	628.54	194.7	0.489494	-2.27	5.1529	-11.6971	-14.7996	-15.4781	-11.8922	-11.1735	37.0825	8.21858
2018-02-26 06:00:00	2.4663	1.64731	4.08906	4.68354	0.331317	1.55371	628.63	194.7	0.489494	-2.18	4.7524	-10.3602	-14.7996	-15.3176	-11.9297	-11.2614	37.0925	8.21885
2018-03-02 06:00:00	2.45903	1.70674	4.00385	4.44136	0.199305	1.47364	628.82	194.7	0.489494	-1.99	3.9601	-7.8806	-14.7996	-14.9916	-12.058	-11.3971	37.1325	8.21993
2018-03-03 06:00:00	2.46393	1.72673	3.91703	4.33937	0.20462	1.48308	628.91	194.7	0.489494	-1.9	3.61	-6.859	-14.7996	-14.7996	-12.2109	-11.573	37.1425	8.2202
2018-03-04 06:00:00	2.4052	1.68176	3.67144	4.05283	0.079722	1.36737	628.91	194.7	0.489494	-1.9	3.61	-6.859	-14.7996	-14.7996	-12.3641	-11.7262	37.1525	8.22047
2018-03-05 06:00:00	2.15318	1.34692	3.0463	3.40691	-0.231194	1.09342	629.08	194.99	15.7505	-1.73	2.9929	-5.17772	-14.7996	-14.7996	-12.5026	-11.8213	37.1625	8.22074
2018-03-06 06:00:00	2.15074	1.30943	2.90738	3.30977	-0.239166	1.11231	629.09	195.54	8.7605	-1.72	2.9584	-5.08845	-11.7474	-14.0366	-12.2711	-11.7444	37.1725	8.22101
2018-03-07 06:00:00	2.22904	1.35441	3.04134	3.48461	-0.106296	1.25401	629.16	195.04	7.191	-1.65	2.7225	-4.49212	-10.0932	-13.623	-12.2461	-11.7636	37.1825	8.22128
2018-03-08 06:00:00	2.01616	1.22947	2.51791	3.39719	-0.268397	0.488851	628.96	194.7	7.434	-1.85	3.4225	-6.33162	-8.7529	-13.2879	-12.3122	-11.8165	37.1925	8.22155
2018-03-09 06:00:00	2.08957	1.25696	2.74365	3.62545	-0.172731	0.60457	628.84	194.7	-0.518005	-1.97	3.8809	-7.64537	-7.364	-12.9407	-12.3526	-11.813	37.2025	8.22181
2018-03-10 06:00:00	2.1067	1.33942	2.94955	3.83429	-0.103639	0.571507	628.93	194.7	0.981495	-1.88	3.5344	-6.64467	-7.5655	-12.9911	-12.5427	-11.8565	37.2125	8.22208
2018-03-11 06:00:00	2.05531	1.32443	2.97932	3.844	-0.13287	0.569146	629.06	194.7	-0.053509	-1.75	3.0625	-5.35938	-10.5193	-12.9665	-12.622	-11.873	37.2225	8.22235
2018-03-12 06:00:00	2.03084	1.33942	2.99917	3.84643	-0.140842	0.48649	629.12	195.68	5.4055	-1.69	2.8561	-4.82681	-12.2821	-12.9936	-12.788	-11.9546	37.2325	8.22262
2018-03-13 06:00:00	1.96723	1.30444	2.89498	3.71773	-0.239166	0.349517	629.14	194.7	7.354	-1.67	2.7889	-4.65746	-12.6392	-12.7478	-12.8875	-11.8819	37.2425	8.22289
2018-03-14 06:00:00	1.93297	1.29194	2.81063	3.61574	-0.273712	0.335347	629.17	194.7	6.78399	-1.64	2.6896	-4.41094	-12.6552	-12.4046	-12.7665	-11.8163	37.2525	8.22316
2018-03-15 06:00:00	1.84733	1.20948	2.67171	3.44819	-0.385323	0.184205	629.21	194.7	12.0095	-1.6	2.56	-4.096	-11.1948	-12.0899	-12.6529	-11.7485	37.2625	8.22343
2018-03-16 06:00:00	1.91095	1.26945	2.58737	3.38019	-0.334832	0.262138	629.25	194.7	11.9065	-1.56	2.4336	-3.79642	-8.9892	-11.5139	-12.4242	-11.6736	37.2725	8.22369
2018-03-17 06:00:00	1.91584	1.26196	2.52783	3.34134	-0.310916	0.285754	629.28	194.7	9.44749	-1.53	2.3409	-3.58158	-6.5972	-10.943	-12.1568	-11.6104	37.2825	8.22396
2018-03-18 06:00:00	1.95255	1.28445	2.56752	3.39719	-0.260425	0.337709	629.31	194.7	10.505	-1.5	2.25	-3.375	-5.7888	-10.4951	-11.962	-11.5743	37.2925	8.22423
2018-03-19 06:00:00	1.96478	1.30194	2.50055	3.31949	-0.260425	0.314093	629.46	194.7	13.131	-1.35	1.8225	-2.46037	-5.1586	-9.99435	-11.7846	-11.5466	37.3025	8.2245
2018-03-20 06:00:00	1.95744	1.30693	2.42861	3.24178	-0.273712	0.321178	629.46	194.7	11.445	-1.35	1.8225	-2.46037	-3.8892	-9.36228	-11.6763	-11.5029	37.3125	8.22477
2018-03-21 06:00:00	2.00393	1.36191	2.57249	3.43362	-0.156787	0.481766	629.59	194.7	6.00101	-1.22	1.4884	-1.81585	-4.0021	-8.8145	-11.6235	-11.4	37.3225	8.22503
2018-03-22 06:00:00	2.03084	1.35441	2.71885	3.56717	-0.095666	0.538445	629.7	194.79	1.119	-1.11	1.2321	-1.36763	-5.1832	-8.53893	-11.6294	-11.3688	37.3325	8.2253
2018-03-23 06:00:00	1.99414	1.33192	2.70396	3.55017	-0.135527	0.479405	629.64	194.7	2.91	-1.17	1.3689	-1.60161	-6.8489	-8.50745	-11.7624	-11.344	37.3425	8.22557
2018-03-24 06:00:00	1.9134	1.27945	2.64195	3.47004	-0.207277	0.394387	629.63	194.7	4.08901	-1.18	1.3924	-1.64303	-8.3679	-8.38643	-11.9003	-11.2921	37.3525	8.22584
2018-03-25 06:00:00	1.86446	1.26695	2.59481	3.38748	-0.260425	0.314093	629.65	195.05	10.4125	-1.16	1.3456	-1.5609	-10.1763	-8.20645	-12.0032	-11.221	37.3625	8.22611
2018-03-26 06:00:00	1.9134	1.30693	2.56008	3.36562	-0.212592	0.358963	629.71	194.7	11.952	-1.1	1.21	-1.331	-10.3828	-8.47335	-11.9921	-11.0877	37.3725	8.22637
2018-03-27 06:00:00	1.95989	1.34941	2.54272	3.3632	-0.159444	0.406195	629.83	194.7	11.8205	-0.98	0.9604	-0.941192	-9.1926	-8.31378	-11.9446	-11.0496	37.3825	8.22664
2018-03-28 06:00:00	2.09935	1.11203	2.53527	3.19564	-0.297629	1.13357	629.9	194.7	12.055	-0.91	0.8281	-0.753571	-7.0523	-8.0823	-11.8702	-11.0497	37.3925	8.22691
2018-03-29 06:00:00	1.92563	0.862148	2.16069	2.82654	-0.581971	0.904493	629.69	194.7	7.90099	-1.12	1.2544	-1.40493	-5.2233	-7.85125	-11.7931	-10.919	37.4025	8.22718
2018-03-30 06:00:00	1.78861	0.654748	1.83076	2.48901	-0.78659	0.727373	629.59	194.7	14.2305	-1.22	1.4884	-1.81585	-4.4609	-7.4303	-11.7236	-10.8218	37.4125	8.22744
2018-03-31 06:00:00	1.81308	0.694729	1.7861	2.4453	-0.765331	0.762797	629.59	194.7	8.9445	-1.22	1.4884	-1.81585	-3.6973	-6.76785	-11.5561	-10.6941	37.4225	8.22771
2018-04-01 06:00:00	1.63691	0.424858	1.4785	2.16847	-1.00716	0.562061	629.36	194.7	9.1825	-1.45	2.1025	-3.04862	-4.2988	-6.31795	-11.4392	-10.6857	37.4325	8.22798
2018-04-02 06:00:00	1.43872	0.077525	1.03445	1.71681	-1.33136	0.314093	628.79	194.7	12.1295	-2.02	4.0804	-8.24241	-4.8264	-6.1291	-11.4193	-10.6911	37.4425	8.22824
2018-04-03 06:00:00	1.40691	-0.017429	0.781421	1.45941	-1.48283	0.22199	628.63	194.7	14.327	-2.18	4.7524	-10.3602	-4.8115	-5.89033	-11.2477	-10.6639	37.4525	8.22851
2018-04-04 06:00:00	1.4167	-0.059909	0.578003	1.25543	-1.5785	0.174758	627.76	195.73	15.808	-3.05	9.3025	-28.3726	-3.5263	-5.51318	-11.0172	-10.6024	37.4625	8.22878
2018-04-05 06:00:00	1.37021	-0.257314	0.220782	0.903328	-1.815	0.033062	626.14	194.7	15.7015	-4.67	21.8089	-101.848	-3.2108	-5.32325	-10.7865	-10.4475	37.4725	8.22904
2018-04-06 06:00:00	1.44606	-0.149866	0.235667	0.908184	-1.74325	0.10391	626.44	194.7	16.4155	-4.37	19.0969	-83.4535	-1.8594	-5.1335	-10.5413	-10.3537	37.4825	8.22931
2018-04-07 06:00:00	1.68095	0.177477	0.694596	1.36471	-1.41639	0.363686	626.34	194.7	8.31001	-4.47	19.9809	-89.3146	-0.412799	-4.7851	-10.2892	-10.2953	37.4925	8.22958
2018-04-08 06:00:00	1.7568	0.25494	0.92034	1.58325	-1.32604	0.455789	625.91	194.7	1.20099	-4.9	24.01	-117.649	-1.1767	-4.89485	-10.1723	-10.3125	37.5025	8.22984
2018-04-09 06:00:00	1.59531	0.010058	0.659866	1.35742	-1.53598	0.299923	625.1	194.7	6.40149	-5.71	32.6041	-186.169	-3.8019	-5.49135	-10.1106	-10.4201	37.5125	8.23011
2018-04-10 06:00:00	1.44361	-0.222331	0.362182	1.08302	-1.75123	0.144058	624.7	195.17	6.65651	-6.11	37.3321	-228.099	-5.6832	-5.74353	-9.95854	-10.4127	37.5225	8.23038
2018-04-11 06:00:00	1.20383	-0.609645	-0.193495	0.548796	-2.13389	-0.136973	623.73	194.7	13.383	-7.08	50.1264	-354.895	-7.4922	-5.71075	-9.7471	-10.4489	37.5325	8.23064
2018-04-12 06:00:00	1.16468	-0.72459	-0.463891	0.24283	-2.29334	-0.23616	623.49	195.97	15.8255	-7.32	53.5824	-392.223	-8.0987	-5.09755	-9.4682	-10.4265	37.5425	8.23091
2018-04-13 06:00:00	1.19159	-0.697103	-0.585445	0.121415	-2.30662	-0.238522	623.48	195.2	17.6515	-7.33	53.7289	-393.833	-6.5956	-4.45178	-9.2126	-10.2518	37.5525	8.23118
2018-04-14 06:00:00	1.19404	-0.762072	-0.783901	-0.08499	-2.40495	-0.288115	622.73	195.73	18.173	-8.08	65.2864	-527.514	-3.3055	-3.77365	-8.92657	-10.0553	37.5625	8.23144
2018-04-15 06:00:00	1.22585	-0.72459	-0.865764	-0.160268	-2.43418	-0.283392	622.35	195.54	13.1705	-8.46	71.5716	-605.496	-0.951202	-3.38563	-8.63184	-9.83432	37.5725	8.23171
2018-04-16 06:00:00	1.41425	-0.487204	-0.49614	0.218547	-2.17375	-0.082656	621.97	195	10.1895	-8.84	78.1456	-690.807	0.351597	-3.3247	-8.42049	-9.64199	37.5825	8.23197
2018-04-17 06:00:00	1.52436	-0.362264	-0.215821	0.492945	-2.01962	0.040147	621.12	195.06	9.6375	-9.69	93.8961	-909.853	-0.287101	-3.40625	-8.25883	-9.50388	37.5925	8.23224
2018-04-18 06:00:00	1.36042	-0.624638	-0.5656	0.15784	-2.28802	-0.141696	620.44	195.72	11.983	-10.37	107.537	-1115.16	-1.5247	-3.52713	-8.10636	-9.39527	37.6025	8.23251
2018-04-19 06:00:00	1.19893	-0.847031	-0.917859	-0.174838	-2.51921	-0.278669	619.38	195.69	8.41001	-11.43	130.645	-1493.27	-2.6584	-3.32303	-7.9148	-9.33583	37.6125	8.23277
2018-04-20 06:00:00	1.0301	-1.13439	-1.32469	-0.582792	-2.80887	-0.465235	618.34	194.7	11.4615	-12.47	155.501	-1939.1	-4.611	-3.61405	-7.78279	-9.33436	37.6225	8.23304
2018-04-21 06:00:00	1.02521	-1.16938	-1.47106	-0.735775	-2.8567	-0.500659	618.64	194.7	15.9215	-12.17	148.109	-1802.49	-4.9528	-3.4882	-7.59993	-9.27759	37.6325	8.2333
2018-04-22 06:00:00	1.01053	-1.23435	-1.71664	-1.00289	-2.97629	-0.564422	617.54	195.56	16.9235	-13.27	176.093	-2336.75	-3.8064	-3.15125	-7.34273	-9.20181	37.6425	8.23357
2018-04-23 06:00:00	0.907763	-1.37928	-2.02921	-1.33314	-3.17559	-0.706118	617.66	194.7	18.545	-13.15	172.922	-2273.93	-2.3492	-2.91155	-7.06883	-9.13806	37.6525	8.23384
2018-04-24 06:00:00	0.927337	-1.37678	-2.25	-1.53954	-3.24469	-0.725011	617.02	194.7	18.8195	-13.79	190.164	-2622.36	-1.0368	-2.70065	-6.7679	-9.04598	37.6625	8.2341
2018-04-25 06:00:00	0.998294	-1.3193	-2.25992	-1.5104	-3.22874	-0.69431	616.33	194.7	14.378	-14.48	209.67	-3036.03	1.0451	-2.55008	-6.4624	-8.9452	37.6725	8.23437
2018-04-26 06:00:00	1.11329	-1.15438	-2.01929	-1.32099	-3.03209	-0.547891	616.42	194.7	12.7285	-14.39	207.072	-2979.77	1.6284	-2.61625	-6.23093	-8.88657	37.6825	8.23463
2018-04-27 06:00:00	1.20872	-0.979467	-1.79851	-1.10973	-2.87796	-0.455789	617.91	195.77	16.143	-12.9	166.41	-2146.69	0.989796	-2.8006	-6.02694	-8.82689	37.6925	8.2349
2018-04-28 06:00:00	1.32127	-0.789558	-1.51571	-0.840192	-2.67334	-0.321178	618.92	194.7	14.762	-11.89	141.372	-1680.91	0.833699	-2.40895	-5.76605	-8.73007	37.7025	8.23516
2018-04-29 06:00:00	1.34819	-0.709597	-1.414	-0.740631	-2.58831	-0.269222	619.92	194.7	15.3275	-10.89	118.592	-1291.47	0.0770994	-1.7309	-5.52818	-8.60748	37.7125	8.23543
2018-04-30 06:00:00	1.42893	-0.55717	-1.20562	-0.539083	-2.43418	-0.181843	620.86	194.7	17.2055	-9.95	99.0025	-985.075	-0.621299	-1.2846	-5.28088	-8.48363	37.7225	8.23569
2018-05-01 06:00:00	1.40691	-0.587156	-1.25771	-0.594934	-2.47138	-0.210182	621.67	194.7	18.3965	-9.14	83.5396	-763.552	-0.0558008	-0.75715	-5.00228	-8.31393	37.7325	8.23596
2018-05-02 06:00:00	1.42893	-0.532182	-1.1957	-0.539083	-2.42089	-0.184205	622.55	194.7	18.566	-8.26	68.2276	-563.56	1.0778	-0.506475	-4.70383	-8.19826	37.7425	8.23622
2018-05-03 06:00:00	1.34329	-0.614642	-1.29989	-0.641071	-2.51921	-0.264499	623.42	194.7	16.6295	-7.39	54.6121	-403.583	1.5624	-0.369449	-4.40255	-8.01236	37.7525	8.23649
2018-05-04 06:00:00	1.49989	-0.304791	-0.838477	-0.196692	-2.18173	-0.042509	624.08	194.7	9.9265	-6.73	45.2929	-304.821	1.9359	-0.420549	-4.13355	-7.83313	37.7625	8.23675
2018-05-05 06:00:00	1.39468	-0.384753	-0.907936	-0.267113	-2.2269	-0.094464	624.74	194.7	13.867	-6.07	36.8449	-223.649	0.855702	-0.832874	-4.23062	-7.74468	37.7725	8.23702
2018-05-06 06:00:00	1.28702	-0.569664	-1.19818	-0.551224	-2.40229	-0.196013	624.28	194.7	15.7405	-6.53	42.6409	-278.445	0.188004	-0.798048	-4.14551	-7.60158	37.7825	8.23728
2018-05-07 06:00:00	1.12797	-0.82704	-1.62238	-1.0126	-2.69726	-0.396749	623.9	194.7	19.8365	-6.91	47.7481	-329.939	-0.343196	-0.520499	-4.00302	-7.441	37.7925	8.23755
2018-05-08 06:00:00	1.17936	-0.757074	-1.62486	-0.983461	-2.676	-0.377856	624.11	194.7	19.325	-6.7	44.89	-300.763	-0.0890994	-0.0105489	-3.79631	-7.23501	37.8025	8.23781
2018-05-09 06:00:00	1.21851	-0.74458	-1.62982	-0.995603	-2.66006	-0.344794	623.83	194.7	15.2655	-6.98	48.7204	-340.068	0.450001	0.356551	-3.46559	-6.99247	37.8125	8.23807
2018-05-10 06:00:00	1.17202	-0.804551	-1.67695	-1.04417	-2.6946	-0.377856	623.83	194.7	14.1315	-6.98	48.7204	-340.068	1.5178	0.699325	-3.22753	-6.79263	37.8225	8.23834
2018-05-11 06:00:00	1.27234	-0.632134	-1.44129	-0.801339	-2.52984	-0.262138	623.9	194.7	13.4185	-6.91	47.7481	-329.939	1.5707	0.832825	-2.99111	-6.56862	37.8325	8.2386
2018-05-12 06:00:00	1.24053	-0.694604	-1.54796	-0.859618	-2.58565	-0.299923	623.86	194.7	17.6665	-6.95	48.3025	-335.702	1.1063	0.707675	-2.85756	-6.38229	37.8425	8.23887
2018-05-13 06:00:00	1.08149	-0.934489	-1.92254	-1.29428	-2.84873	-0.469958	623.47	194.7	18.1385	-7.34	53.8756	-395.447	0.672299	0.744825	-2.68568	-6.19144	37.8525	8.23913
2018-05-14 06:00:00	0.831912	-1.31431	-2.43853	-1.8358	-3.23671	-0.739181	622.95	194.7	21.359	-7.86	61.7796	-485.588	0.434998	0.7245	-2.49644	-5.99534	37.8625	8.2394
2018-05-15 06:00:00	0.800104	-1.39177	-2.70396	-2.04463	-3.38287	-0.821837	622.3	200.11	21.0915	-8.51	72.4201	-616.295	1.6537	0.851475	-2.34062	-5.76345	37.8725	8.23966
2018-05-16 06:00:00	0.846593	-1.3368	-2.69156	-2.07863	-3.36161	-0.805306	623.05	194.7	19.81	-7.76	60.2176	-467.289	3.0457	1.18715	-2.18753	-5.53454	37.8825	8.23992
2018-05-17 06:00:00	0.724253	-1.45174	-2.94707	-2.33845	-3.48651	-0.878515	623.75	205.54	19.5175	-7.06	49.8436	-351.896	4.324	1.54122	-2.01483	-5.31987	37.8925	8.24019
2018-05-18 06:00:00	0.589679	-1.60167	-3.16289	-2.54729	-3.63001	-0.984787	624.34	194.7	20.3715	-6.47	41.8609	-270.84	4.6942	1.70995	-1.86462	-5.10845	37.9025	8.24045
2018-05-19 06:00:00	0.501594	-1.73411	-3.30429	-2.63228	-3.72302	-1.058	624.96	194.79	22.098	-5.85	34.2225	-200.202	5.1408	1.99043	-1.74394	-4.88753	37.9125	8.24071
2018-05-20 06:00:00	0.616594	-1.57668	-3.22243	-2.50115	-3.62735	-0.972979	624.89	194.7	21.216	-5.92	35.0464	-207.475	5.2886	2.32895	-1.56639	-4.64744	37.9225	8.24098
2018-05-21 06:00:00	0.714466	-1.41676	-3.0339	-2.29717	-3.48385	-0.895046	625.19	194.73	18.6845	-5.62	31.5844	-177.504	5.3135	2.52948	-1.31281	-4.41715	37.9325	8.24124
2018-05-22 06:00:00	0.824572	-1.24184	-2.79327	-2.0592	-3.31643	-0.786413	625.78	194.7	19.2765	-5.03	25.3009	-127.264	5.0884	2.54388	-1.02005	-4.21498	37.9425	8.24151
2018-05-23 06:00:00	0.831912	-1.26933	-2.85032	-2.13448	-3.3749	-0.793498	625.61	194.7	19.358	-5.2	27.04	-140.608	5.0402	2.5794	-0.747275	-4.00623	37.9525	8.24177
2018-05-24 06:00:00	1.02032	-1.00196	-2.51295	-1.83094	-3.09853	-0.597485	625.79	194.7	15.906	-5.02	25.2004	-126.506	4.8375	2.71582	-0.492792	-3.79658	37.9625	8.24203
2018-05-25 06:00:00	0.949358	-1.09441	-2.61218	-1.90379	-3.1942	-0.661248	625.89	194.7	19.6245	-4.92	24.2064	-119.095	3.5991	3.0148	-0.401233	-3.62529	37.9725	8.2423
2018-05-26 06:00:00	0.809891	-1.27682	-2.87761	-2.18304	-3.36693	-0.774605	625.94	194.7	19.9905	-4.87	23.7169	-115.501	3.2808	3.30267	-0.273358	-3.41268	37.9825	8.24256
2018-05-27 06:00:00	0.677764	-1.47173	-3.12568	-2.45016	-3.5556	-0.923386	626.12	194.7	21.811	-4.69	21.9961	-103.162	3.542	3.51517	-0.137192	-3.196	37.9925	8.24282
2018-05-28 06:00:00	0.692444	-1.45924	-3.13064	-2.43316	-3.55029	-0.93047	626.39	194.7	22.4505	-4.42	19.5364	-86.3509	4.0489	3.6139	0.0254081	-2.9591	38.0025	8.24309
2018-05-29 06:00:00	0.702232	-1.45674	-3.13809	-2.49629	-3.56092	-0.937555	626.32	194.7	21.711	-4.49	20.1601	-90.5188	4.6674	3.77017	0.2679	-2.71508	38.0125	8.24335
2018-05-30 06:00:00	0.809891	-1.28682	-2.95947	-2.27775	-3.4307	-0.845453	626.55	194.7	20.4335	-4.26	18.1476	-77.3088	5.8284	4.09245	0.392575	-2.47929	38.0225	8.24361
2018-05-31 06:00:00	0.78787	-1.31431	-3.00413	-2.3336	-3.46791	-0.880877	626.6	194.7	21.164	-4.21	17.7241	-74.6185	5.9902	4.40755	0.584058	-2.25769	38.0325	8.24387
2018-06-01 06:00:00	0.998294	-0.99446	-2.57497	-1.8965	-3.14902	-0.64944	626.88	195.05	16.3015	-3.93	15.4449	-60.6985	6.2249	4.79482	0.78375	-2.02797	38.0425	8.24414
2018-06-02 06:00:00	1.20383	-0.694604	-2.09123	-1.42056	-2.82747	-0.418003	626.99	195.62	15.34	-3.82	14.5924	-55.743	5.123	4.72657	0.853283	-1.85228	38.0525	8.2444
2018-06-03 06:00:00	1.29191	-0.574662	-1.85804	-1.20444	-2.68929	-0.328262	627.17	194.7	17.463	-3.64	13.2496	-48.2285	3.7009	4.58665	0.870166	-1.68728	38.0625	8.24466
2018-06-04 06:00:00	1.29925	-0.569664	-1.79106	-1.14616	-2.66803	-0.325901	627.32	194.7	18.724	-3.49	12.1801	-42.5085	2.8513	4.39185	0.89775	-1.66825	38.0725	8.24493
2018-06-05 06:00:00	1.24542	-0.637132	-1.88285	-1.23115	-2.74244	-0.396749	627.23	195.27	19.8725	-3.58	12.8164	-45.8827	2.5094	4.27347	0.948125	-1.55755	38.0825	8.24519
2018-06-06 06:00:00	1.39223	-0.342273	-1.45617	-0.818337	-2.42355	-0.205459	628.84	196.07	20.353	-1.97	3.8809	-7.64537	2.2511	4.2766	1.00574	-1.41664	38.0925	8.24545
2018-06-07 06:00:00	1.51212	-0.127376	-1.10391	-0.483232	-2.16844	-0.042509	629.86	195.37	20.359	-0.95	0.9025	-0.857375	3.0614	4.31837	1.20646	-1.27309	38.1025	8.24571
2018-06-08 06:00:00	1.48765	-0.152364	-1.09151	-0.475947	-2.18438	-0.068486	630.09	194.94	20.5625	-0.72	0.5184	-0.373248	4.0652	4.31775	1.52576	-1.04113	38.1125	8.24597
2018-06-09 06:00:00	1.34085	-0.324782	-1.34702	-0.71392	-2.39697	-0.219629	629.86	195.68	20.8925	-0.95	0.9025	-0.857375	4.6851	4.24097	1.76178	-0.823562	38.1225	8.24624
2018-06-10 06:00:00	1.25765	-0.434729	-1.53555	-0.903328	-2.52719	-0.311731	629.94	194.7	21.527	-0.87	0.7569	-0.658503	5.1188	4.2248	1.99904	-0.590828	38.1325	8.2465
2018-06-11 06:00:00	1.35797	-0.277304	-1.42392	-0.75763	-2.39963	-0.212544	630.1	194.7	19.7865	-0.71	0.5041	-0.357911	5.4497	4.36692	2.13477	-0.4117	38.1425	8.24676
2018-06-12 06:00:00	1.27723	-0.38975	-1.54052	-0.910612	-2.52984	-0.290477	630.06	195.66	17.809	-0.75	0.5625	-0.421875	5.3364	4.39242	2.20079	-0.273561	38.1525	8.24702
2018-06-13 06:00:00	1.26989	-0.409741	-1.58269	-0.934896	-2.52984	-0.285754	630.24	194.7	18.3035	-0.57	0.3249	-0.185193	4.8264	4.31497	2.20342	-0.151061	38.1625	8.24729
2018-06-14 06:00:00	1.39468	-0.194844	-1.3371	-0.696922	-2.33054	-0.139334	630.45	194.7	17.182	-0.36	0.1296	-0.046656	4.3746	4.43485	2.20559	-0.081128	38.1725	8.24755
2018-06-15 06:00:00	1.51946	0.010058	-1.10639	-0.45652	-2.16844	-0.021254	630.09	194.7	15.4655	-0.72	0.5184	-0.373248	3.6325	4.31272	2.27245	-0.0225113	38.1825	8.24781
2018-06-16 06:00:00	1.31638	-0.352268	-1.51571	-0.913041	-2.52453	-0.240883	629.25	194.79	17.833	-1.56	2.4336	-3.79642	2.4202	4.08648	2.36038	0.0443554	38.1925	8.24807
2018-06-17 06:00:00	1.11574	-0.644628	-1.87789	-1.24086	-2.79558	-0.434534	628.62	194.7	17.383	-2.19	4.7961	-10.5035	2.0295	3.88757	2.49697	0.125778	38.2025	8.24833
2018-06-18 06:00:00	0.883295	-0.996959	-2.30705	-1.65124	-3.12244	-0.670694	627.81	195.63	20.4675	-3	9	-27	1.9443	3.6342	2.58697	0.173022	38.2125	8.24859
2018-06-19 06:00:00	0.946912	-0.97447	-2.46582	-1.77509	-3.19154	-0.677779	626.87	194.7	21.9625	-3.94	15.5236	-61.163	2.3771	3.57203	2.78793	0.273272	38.2225	8.24886
2018-06-20 06:00:00	0.861274	-1.17687	-2.83048	-2.1539	-3.4493	-0.82656	625.59	194.7	21.784	-5.22	27.2484	-142.237	3.3332	3.64848	2.96295	0.450622	38.2325	8.24912
2018-06-21 06:00:00	0.900422	-1.15938	-2.92226	-2.21947	-3.47854	-0.82656	625.03	194.7	21.817	-5.78	33.4084	-193.101	4.5969	3.67947	3.06066	0.680233	38.2425	8.24938
2018-06-22 06:00:00	0.927337	-1.14689	-2.97684	-2.28746	-3.48119	-0.798221	624.04	195.67	20.348	-6.77	45.8329	-310.289	5.3937	3.95525	3.14222	0.890311	38.2525	8.24964
2018-06-23 06:00:00	0.951805	-1.1194	-2.93715	-2.25103	-3.45462	-0.791136	624.12	195.32	21.4435	-6.69	44.7561	-299.418	5.9867	4.20565	3.17227	1.07097	38.2625	8.2499
2018-06-24 06:00:00	0.993401	-1.05443	-2.9049	-2.22432	-3.42007	-0.750989	624.22	194.8	20.7625	-6.59	43.4281	-286.191	6.1819	4.40468	3.216	1.19353	38.2725	8.25016
2018-06-25 06:00:00	0.888188	-1.20186	-3.11328	-2.40887	-3.55826	-0.831283	624.22	194.7	21.437	-6.59	43.4281	-286.191	5.9419	4.5066	3.32241	1.29143	38.2825	8.25042
2018-06-26 06:00:00	0.91755	-1.10691	-2.98676	-2.32874	-3.46791	-0.779328	625.36	194.7	21.886	-5.45	29.7025	-161.879	5.8725	4.58483	3.46755	1.39828	38.2925	8.25069
2018-06-27 06:00:00	0.763402	-1.43425	-3.51019	-2.83625	-3.85589	-1.00368	623.79	194.7	20.7595	-7.02	49.2804	-345.948	5.8863	4.66147	3.56327	1.50751	38.3025	8.25095
2018-06-28 06:00:00	0.555424	-1.78408	-4.08075	-3.36077	-4.18806	-1.19025	622.16	194.7	21.5895	-8.65	74.8225	-647.215	5.9686	4.6815	3.66322	1.65038	38.3125	8.25121
2018-06-29 06:00:00	0.413509	-1.97649	-4.41813	-3.66673	-4.36611	-1.2918	621.59	194.7	21.329	-9.22	85.0084	-783.777	5.9978	4.73285	3.76759	1.73215	38.3225	8.25147
2018-06-30 06:00:00	0.540743	-1.73411	-3.984	-3.2952	-4.111	-1.1808	625	194.7	21.8525	-5.81	33.7561	-196.123	6.1111	4.75467	3.83632	1.86976	38.3325	8.25173
2018-07-01 06:00:00	0.729146	-1.37428	-3.45561	-2.79497	-3.73099	-0.961171	627.32	194.7	21.841	-3.49	12.1801	-42.5085	6.1942	4.77095	3.89392	2.01053	38.3425	8.25199
2018-07-02 06:00:00	0.839252	-1.16938	-3.21499	-2.51086	-3.56092	-0.852538	627.91	194.09	20.937	-2.9	8.41	-24.389	6.1852	4.87368	3.9485	2.11844	38.3525	8.25225
2018-07-03 06:00:00	0.812338	-1.18687	-3.19762	-2.49386	-3.56357	-0.878515	628.45	194.7	21.9445	-2.36	5.5696	-13.1443	6.2207	5.03007	4.02029	2.19188	38.3625	8.25251
2018-07-04 06:00:00	0.907763	-1.02944	-2.97188	-2.29231	-3.40944	-0.791136	629.38	195.83	23.25	-1.43	2.0449	-2.92421	6.2917	5.21212	4.22059	2.26007	38.3725	8.25277
2018-07-05 06:00:00	0.871061	-1.04693	-3.00909	-2.34331	-3.4307	-0.814752	629.85	194.76	23.276	-0.96	0.9216	-0.884736	6.6759	5.51552	4.37697	2.34394	38.3825	8.25303
2018-07-06 06:00:00	0.756061	-1.18937	-3.16289	-2.49144	-3.55029	-0.906854	630.06	194.12	23.3125	-0.75	0.5625	-0.421875	6.9606	5.90605	4.50257	2.42017	38.3925	8.25329
2018-07-07 06:00:00	0.834359	-1.07942	-3.06118	-2.38216	-3.45196	-0.833645	630.31	194.7	23.14	-0.5	0.25	-0.125	7.2549	6.18002	4.5605	2.58686	38.4025	8.25355
2018-07-08 06:00:00	0.905316	-0.95198	-2.92475	-2.26075	-3.32972	-0.75335	629.85	195.65	21.1655	-0.96	0.9216	-0.884736	7.6955	6.46788	4.62408	2.83063	38.4125	8.25381
2018-07-09 06:00:00	0.790316	-1.20686	-3.24227	-2.58371	-3.59546	-0.902131	628.85	195.66	21.922	-1.96	3.8416	-7.52954	7.5397	6.50277	4.72242	2.99467	38.4225	8.25407
2018-07-10 06:00:00	0.555424	-1.57668	-3.79299	-3.11551	-3.98876	-1.14301	627.08	195.66	21.1795	-3.73	13.9129	-51.8951	7.2741	6.50075	4.85226	3.16429	38.4325	8.25433
2018-07-11 06:00:00	0.327871	-2.01647	-4.42557	-3.69587	-4.40863	-1.37209	624.42	195.66	22.2345	-6.39	40.8321	-260.917	6.8548	6.47053	4.98161	3.25092	38.4425	8.25459
2018-07-12 06:00:00	0.619041	-1.55919	-3.8947	-3.14465	-4.0233	-1.09578	624.66	195.13	22.4255	-6.15	37.8225	-232.608	6.6392	6.4914	5.05774	3.32213	38.4525	8.25485
2018-07-13 06:00:00	0.694891	-1.45174	-3.70865	-2.98438	-3.91967	-1.03674	625.8	194.86	22.5595	-5.01	25.1001	-125.752	6.4963	6.59527	5.12919	3.37517	38.4625	8.25511
2018-07-14 06:00:00	0.736487	-1.37178	-3.60446	-2.88482	-3.82931	-0.98951	626.31	194.48	20.754	-4.5	20.25	-91.125	6.7751	6.65108	5.1492	3.42391	38.4725	8.25537
2018-07-15 06:00:00	0.697338	-1.40676	-3.58461	-2.86782	-3.79743	-0.980064	626.61	195.66	20.4185	-4.2	17.64	-74.088	6.5415	6.65065	5.14358	3.50817	38.4825	8.25563
2018-07-16 06:00:00	0.694891	-1.40176	-3.53996	-2.82411	-3.77351	-0.965894	626.97	195.66	20.775	-3.84	14.7456	-56.6231	6.3893	6.59973	5.15372	3.62183	38.4925	8.25589
2018-07-17 06:00:00	0.829465	-1.18687	-3.26212	-2.55214	-3.5928	-0.843091	627.58	194.54	21.7565	-3.23	10.4329	-33.6983	6.0974	6.54418	5.17468	3.74558	38.5025	8.25615
2018-07-18 06:00:00	0.91021	-1.1119	-3.12816	-2.43316	-3.51574	-0.807667	627.91	194.54	21.944	-2.9	8.41	-24.389	5.9636	6.59403	5.19776	3.85417	38.5125	8.25641
2018-07-19 06:00:00	0.91755	-1.07442	-3.06863	-2.37002	-3.46259	-0.793498	628.24	194.77	21.188	-2.57	6.6049	-16.9746	5.8405	6.61175	5.19519	4.00455	38.5225	8.25667
2018-07-20 06:00:00	0.871061	-1.13189	-3.09095	-2.3943	-3.4998	-0.824198	628.38	194.75	21.089	-2.43	5.9049	-14.3489	5.9273	6.6047	5.19473	4.11262	38.5325	8.25693
2018-07-21 06:00:00	0.692444	-1.31431	-3.23483	-2.55943	-3.67253	-0.965894	628.78	194.77	20.788	-2.03	4.1209	-8.36543	6.0614	6.56653	5.2348	4.17004	38.5425	8.25719
2018-07-22 06:00:00	0.746274	-1.19686	-3.09095	-2.40159	-3.56889	-0.890323	629.35	194.77	20.3015	-1.46	2.1316	-3.11214	6.064	6.51388	5.25999	4.21298	38.5525	8.25745
2018-07-23 06:00:00	0.738934	-1.21186	-3.15049	-2.4453	-3.57686	-0.902131	629.75	194.51	21.81	-1.06	1.1236	-1.19102	5.773	6.4821	5.27572	4.23249	38.5625	8.25771
2018-07-24 06:00:00	0.804997	-1.1244	-3.0587	-2.38216	-3.53168	-0.859622	630.15	194.16	23.447	-0.66	0.4356	-0.287496	5.7462	6.47538	5.37412	4.26572	38.5725	8.25797
2018-07-25 06:00:00	0.946912	-0.921995	-2.85281	-2.15633	-3.3377	-0.729734	630.15	194.75	21.6565	-0.66	0.4356	-0.287496	6.198	6.48523	5.43783	4.36649	38.5825	8.25823
2018-07-26 06:00:00	0.824572	-1.1269	-3.10584	-2.40159	-3.55826	-0.87143	629.3	194.78	22.161	-1.51	2.2801	-3.44295	6.3115	6.40425	5.46559	4.46569	38.5925	8.25849
2018-07-27 06:00:00	0.86372	-1.07692	-3.09591	-2.39916	-3.53168	-0.852538	629.58	194.77	20.5665	-1.23	1.5129	-1.86087	6.5861	6.34668	5.47143	4.53256	38.6025	8.25875
2018-07-28 06:00:00	0.878401	-0.976968	-2.90986	-2.21461	-3.38553	-0.755712	630.68	194.75	20.1245	-0.13	0.0169	-0.002197	6.6391	6.218	5.44003	4.59705	38.6125	8.25901
2018-07-29 06:00:00	0.773189	-1.13439	-3.09343	-2.41373	-3.52106	-0.866707	630.74	194.48	22.294	-0.07	0.0049	-0.000343	6.302	6.16595	5.41358	4.65035	38.6225	8.25926
2018-07-30 06:00:00	0.743827	-1.14689	-3.05622	-2.37731	-3.51574	-0.864346	631.35	194.48	22.462	0.54	0.2916	0.157464	6.0714	6.18455	5.44459	4.70689	38.6325	8.25952
2018-07-31 06:00:00	0.846593	-1.00446	-2.90738	-2.22675	-3.42007	-0.786413	631	194.46	20.986	0.19	0.0361	0.006859	6.2325	6.24868	5.46623	4.75206	38.6425	8.25978
2018-08-01 06:00:00	0.932231	-0.892009	-2.81311	-2.12233	-3.30581	-0.687226	630.93	194.52	20.123	0.12	0.0144	0.001728	5.9975	6.18625	5.5443	4.77895	38.6525	8.26004
2018-08-02 06:00:00	0.966486	-0.874518	-2.75854	-2.07377	-3.2872	-0.675418	630.72	195.47	21.5695	-0.09	0.0081	-0.000729	5.9088	6.07113	5.62402	4.81777	38.6625	8.2603
2018-08-03 06:00:00	1.01053	-0.817045	-2.67171	-1.98635	-3.24469	-0.647078	631.11	195.47	21.667	0.3	0.09	0.027	6.1978	6.02163	5.69246	4.94713	38.6725	8.26056
2018-08-04 06:00:00	1.02521	-0.802052	-2.64939	-1.96935	-3.22608	-0.639994	631	194.78	22.227	0.19	0.0361	0.006859	6.0724	6.06727	5.74151	5.0338	38.6825	8.26082
2018-08-05 06:00:00	1.09861	-0.687108	-2.50799	-1.82365	-3.12776	-0.580954	631.2	194.78	22.248	0.39	0.1521	0.059319	6.0254	6.1577	5.78075	5.10587	38.6925	8.26107
2018-08-06 06:00:00	1.05702	-0.739582	-2.54272	-1.85279	-3.18091	-0.623462	631.03	194.75	20.779	0.22	0.0484	0.010648	6.27779	6.23135	5.81233	5.13267	38.7025	8.26133
2018-08-07 06:00:00	1.00074	-0.839534	-2.66923	-1.98149	-3.30049	-0.701395	630.79	194.75	21.269	-0.02	0.0004	-8e-06	6.40899	6.18247	5.81933	5.14882	38.7125	8.26159
2018-08-08 06:00:00	0.890635	-1.00945	-2.88505	-2.22189	-3.47854	-0.82656	630.64	194.78	21.0925	-0.17	0.0289	-0.004913	6.3489	6.14872	5.83111	5.21553	38.7225	8.26185
2018-08-09 06:00:00	0.692444	-1.28682	-3.18026	-2.52543	-3.7177	-0.996595	630.38	194.72	22.3395	-0.43	0.1849	-0.079507	6.234	6.14395	5.83444	5.29287	38.7325	8.26211
2018-08-10 06:00:00	0.560317	-1.46423	-3.37127	-2.70027	-3.87449	-1.1194	630.31	194.45	21.4805	-0.5	0.25	-0.125	6.2565	6.20647	5.84798	5.39199	38.7425	8.26237
2018-08-11 06:00:00	0.523615	-1.55919	-3.44569	-2.77069	-3.95421	-1.1808	630.39	194.61	21.129	-0.42	0.1764	-0.074088	6.103	6.2411	5.87622	5.43437	38.7525	8.26262
2018-08-12 06:00:00	0.462445	-1.67413	-3.56725	-2.90425	-4.06848	-1.25165	630.38	194.75	21.4575	-0.43	0.1849	-0.079507	6.173	6.28247	5.93155	5.4676	38.7625	8.26288
2018-08-13 06:00:00	0.43553	-1.72661	-3.63671	-2.9431	-4.12163	-1.27763	630.29	195.75	21.35	-0.52	0.2704	-0.140608	6.2107	6.26485	5.98412	5.46869	38.7725	8.26314
2018-08-14 06:00:00	0.401275	-1.78658	-3.66151	-2.99409	-4.1482	-1.30597	630.39	194.79	22.9785	-0.42	0.1764	-0.074088	6.2622	6.16	6.05358	5.47157	38.7825	8.2634
2018-08-15 06:00:00	0.665529	-1.37178	-3.34895	-2.64199	-3.824	-1.06036	630.39	195.78	22.512	-0.42	0.1764	-0.074088	6.39	6.2261	6.1788	5.50677	38.7925	8.26365
2018-08-16 06:00:00	0.800104	-1.18187	-3.11824	-2.41859	-3.64595	-0.93047	630.82	194.68	22.5565	0.01	0.0001	1e-06	6.5963	6.24365	6.25678	5.54004	38.8025	8.26391
2018-08-17 06:00:00	0.665529	-1.38177	-3.36879	-2.68813	-3.84791	-1.06036	630.71	194.69	21.508	-0.1	0.01	-0.001	6.8818	6.34315	6.34301	5.56432	38.8125	8.26417
2018-08-18 06:00:00	0.641062	-1.42925	-3.43081	-2.73427	-3.88246	-1.08161	630.62	194.72	23.1915	-0.19	0.0361	-0.006859	6.8919	6.41232	6.36035	5.55777	38.8225	8.26443
2018-08-19 06:00:00	0.648402	-1.44424	-3.4705	-2.78283	-3.88246	-1.08161	630.31	194.73	22.3375	-0.5	0.25	-0.125	7.2602	6.4572	6.38083	5.57972	38.8325	8.26469
2018-08-20 06:00:00	0.6117	-1.52171	-3.58709	-2.91153	-3.9861	-1.15955	629.97	194.73	22.768	-0.84	0.7056	-0.592704	7.132	6.45098	6.39006	5.62031	38.8425	8.26494
2018-08-21 06:00:00	0.467339	-1.76659	-3.85997	-3.17136	-4.18806	-1.30833	629.66	194.75	23.752	-1.15	1.3225	-1.52087	7.1832	6.54007	6.40591	5.6591	38.8525	8.2652
2018-08-22 06:00:00	0.423297	-1.82906	-3.91951	-3.23692	-4.25716	-1.35792	629.54	194.38	20.9785	-1.27	1.6129	-2.04838	7.4223	6.72152	6.46264	5.70792	38.8625	8.26546
2018-08-23 06:00:00	0.322977	-1.98648	-4.09067	-3.40933	-4.39268	-1.45947	629.5	194.38	22.687	-1.31	1.7161	-2.24809	7.3164	6.69198	6.45489	5.76428	38.8725	8.26571
2018-08-24 06:00:00	0.269148	-2.10393	-4.24448	-3.55017	-4.52024	-1.54212	629.23	194.38	24.404	-1.58	2.4964	-3.94431	7.2155	6.74298	6.48697	5.79831	38.8825	8.26597
2018-08-25 06:00:00	0.621487	-1.56918	-3.74338	-3.02809	-4.07911	-1.19025	629.02	195.02	21.2955	-1.79	3.2041	-5.73534	7.6288	6.85183	6.53642	5.84735	38.8925	8.26623
2018-08-26 06:00:00	0.844146	-1.23185	-3.2522	-2.55943	-3.72302	-0.965894	629.27	195.24	22.259	-1.54	2.3716	-3.65226	7.3343	6.8042	6.52658	5.84162	38.9025	8.26649
2018-08-27 06:00:00	0.890635	-1.19686	-3.18026	-2.49386	-3.6991	-0.937555	628.83	195.36	22.522	-1.98	3.9204	-7.76239	7.0357	6.8782	6.55157	5.83949	38.9125	8.26674
2018-08-28 06:00:00	0.939571	-1.15938	-3.12568	-2.41859	-3.65924	-0.890323	628.34	194.53	21.9255	-2.47	6.1009	-15.0692	7.3444	6.94085	6.56711	5.84851	38.9225	8.267
2018-08-29 06:00:00	1.06925	-0.924494	-2.78831	-2.10048	-3.42805	-0.741542	628.62	195.18	21.325	-2.19	4.7961	-10.5035	7.1921	6.9825	6.57705	5.86508	38.9325	8.26726
2018-08-30 06:00:00	1.1818	-0.742081	-2.47326	-1.79208	-3.21811	-0.611654	629.14	195.74	21.0625	-1.67	2.7889	-4.65746	6.5763	6.93178	6.56826	5.86687	38.9425	8.26751
2018-08-31 06:00:00	1.27478	-0.59965	-2.20286	-1.54197	-3.03209	-0.498298	629.54	195.26	21.023	-1.27	1.6129	-2.04838	6.5297	6.91088	6.55528	5.91977	38.9525	8.26777
2018-09-01 06:00:00	1.31882	-0.479707	-2.04658	-1.39142	-2.9444	-0.443981	629.94	195.19	20.7165	-0.87	0.7569	-0.658503	6.2825	6.90558	6.55672	5.98292	38.9625	8.26803
2018-09-02 06:00:00	1.30414	-0.512192	-2.0565	-1.41327	-2.96566	-0.462874	630.14	194.94	20.707	-0.67	0.4489	-0.300763	5.9214	6.86853	6.53625	6.01907	38.9725	8.26828
2018-09-03 06:00:00	1.17691	-0.652124	-2.25744	-1.60996	-3.11713	-0.562061	630.44	195.12	22.236	-0.37	0.1369	-0.050653	5.6777	6.83638	6.49387	6.0411	38.9825	8.26854
2018-09-04 06:00:00	1.0717	-0.822043	-2.48814	-1.85765	-3.30049	-0.689587	630.66	194.89	22.506	-0.15	0.0225	-0.003375	5.8599	6.79925	6.47653	6.06736	38.9925	8.2688
2018-09-05 06:00:00	0.993401	-0.944484	-2.66427	-2.0252	-3.40679	-0.765158	630.61	194.73	22.4495	-0.2	0.04	-0.008	6.1486	6.79895	6.46309	6.09128	39.0025	8.26905
2018-09-06 06:00:00	0.873508	-1.12939	-2.87265	-2.22432	-3.53966	-0.887962	630.53	194.73	23.6685	-0.28	0.0784	-0.021952	6.4339	6.7936	6.45158	6.11451	39.0125	8.26931
2018-09-07 06:00:00	0.885742	-1.10691	-2.9049	-2.24618	-3.5742	-0.880877	630.33	194.9	22.677	-0.48	0.2304	-0.110592	7.0243	6.90163	6.4933	6.14902	39.0225	8.26956
2018-09-08 06:00:00	1.00808	-0.884513	-2.65187	-1.98392	-3.3749	-0.727373	630.49	195.27	18.4245	-0.32	0.1024	-0.032768	7.4183	6.8759	6.50588	6.16885	39.0325	8.26982
2018-09-09 06:00:00	1.37755	-0.329779	-1.88533	-1.26272	-2.81419	-0.34007	631.16	195.24	17.3775	0.35	0.1225	0.042875	6.656	6.68025	6.45997	6.13438	39.0425	8.27008
2018-09-10 06:00:00	1.53904	-0.112384	-1.50578	-0.910612	-2.56173	-0.170035	631.27	195.2	15.9715	0.46	0.2116	0.097336	5.6303	6.41073	6.37902	6.10761	39.0525	8.27033
2018-09-11 06:00:00	1.46808	-0.262312	-1.6844	-1.05388	-2.69992	-0.257414	630.29	196.11	19.51	-0.52	0.2704	-0.140608	4.3347	6.0217	6.27145	6.08719	39.0625	8.27059
2018-09-12 06:00:00	1.47053	-0.272307	-1.74641	-1.10973	-2.74244	-0.271584	629.34	195.68	19.9875	-1.47	2.1609	-3.17652	3.503	5.94828	6.22063	6.1006	39.0725	8.27084
2018-09-13 06:00:00	1.33351	-0.4947	-2.03913	-1.38656	-2.97097	-0.425088	628.7	201.53	20.8555	-2.11	4.4521	-9.39393	2.9651	5.8133	6.20785	6.13177	39.0825	8.2711
2018-09-14 06:00:00	1.2601	-0.642129	-2.26488	-1.59782	-3.13573	-0.533722	628	196.14	21.2115	-2.81	7.8961	-22.188	3.4513	5.63588	6.21513	6.19166	39.0925	8.27136
2018-09-15 06:00:00	1.15978	-0.82704	-2.59729	-1.91593	-3.36161	-0.66361	627.14	196.01	22.339	-3.67	13.4689	-49.4309	4.2181	5.63168	6.22241	6.2292	39.1025	8.27161
2018-09-16 06:00:00	1.15244	-0.82704	-2.6221	-1.93293	-3.35895	-0.661248	627.28	196.19	22.9325	-3.53	12.4609	-43.987	5.4916	5.63568	6.23212	6.28427	39.1125	8.27187
2018-09-17 06:00:00	1.22829	-0.709597	-2.52783	-1.84794	-3.25797	-0.588038	627.25	196.27	22.5105	-3.56	12.6736	-45.118	6.1761	5.6562	6.24859	6.31166	39.1225	8.27212
2018-09-18 06:00:00	1.15734	-0.779563	-2.58985	-1.90379	-3.33238	-0.644717	627.86	195.06	19.535	-2.95	8.7025	-25.6724	6.6807	5.68545	6.27063	6.31774	39.1325	8.27238
2018-09-19 06:00:00	1.06925	-0.936988	-2.74614	-2.07377	-3.45994	-0.734458	628.06	194.79	21.063	-2.75	7.5625	-20.7969	6.4166	5.59595	6.24473	6.29276	39.1425	8.27263
2018-09-20 06:00:00	0.900422	-1.15938	-3.0587	-2.35545	-3.68581	-0.909216	627.77	195.4	21.538	-3.04	9.2416	-28.0945	6.3869	5.59597	6.24932	6.28438	39.1525	8.27289
2018-09-21 06:00:00	0.866167	-1.24184	-3.18274	-2.47929	-3.76288	-0.963533	627.55	194.7	21.7285	-3.26	10.6276	-34.646	6.2267	5.62172	6.26993	6.2976	39.1625	8.27315
2018-09-22 06:00:00	0.868614	-1.22435	-3.16289	-2.4453	-3.74428	-0.937555	627.58	195.49	19.997	-3.23	10.4329	-33.6983	5.9859	5.67232	6.26857	6.30077	39.1725	8.2734
2018-09-23 06:00:00	0.900422	-1.18937	-3.12568	-2.41859	-3.72833	-0.916301	627.74	194.88	21.2675	-3.07	9.4249	-28.9344	5.4832	5.63682	6.21107	6.29226	39.1825	8.27366
2018-09-24 06:00:00	1.18425	-0.737084	-2.52783	-1.85037	-3.27923	-0.625824	628.7	194.85	17.715	-2.11	4.4521	-9.39393	5.8297	5.5884	6.20458	6.29038	39.1925	8.27391
2018-09-25 06:00:00	1.32372	-0.534681	-2.20286	-1.5444	-3.06133	-0.453427	628.79	194.72	15.2895	-2.02	4.0804	-8.24241	5.1601	5.34885	6.13048	6.24403	39.2025	8.27417
2018-09-26 06:00:00	1.265	-0.59965	-2.16069	-1.48126	-3.05601	-0.45815	629.07	194.7	16.0645	-1.74	3.0276	-5.26802	3.9104	4.99085	6.04253	6.18326	39.2125	8.27442
2018-09-27 06:00:00	1.24787	-0.59965	-2.0565	-1.33314	-2.97363	-0.429811	629.53	194.7	15.0885	-1.28	1.6384	-2.09715	2.7776	4.61065	5.97487	6.12187	39.2225	8.27468
2018-09-28 06:00:00	1.43138	-0.274806	-1.59013	-0.866903	-2.61222	-0.200736	630.37	194.7	15.089	-0.44	0.1936	-0.085184	1.7959	4.23123	5.85478	6.05253	39.2325	8.27493
2018-09-29 06:00:00	1.34085	-0.41224	-1.6199	-0.898471	-2.70523	-0.283392	630.67	194.7	17.646	-0.14	0.0196	-0.002744	0.560204	4.06445	5.73189	5.97738	39.2425	8.27519
2018-09-30 06:00:00	1.27723	-0.502196	-1.62486	-0.898471	-2.7637	-0.349517	630.7	195.29	13.726	-0.11	0.0121	-0.001331	0.546403	4.07788	5.67623	5.93077	39.2525	8.27544
2018-10-01 06:00:00	1.17936	-0.689606	-1.74641	-1.00774	-2.92048	-0.474682	630.19	194.7	12.2155	-0.62	0.3844	-0.238328	0.2337	3.9656	5.56961	5.85065	39.2625	8.27569
2018-10-02 06:00:00	1.03255	-0.941985	-1.9796	-1.22386	-3.13307	-0.628186	629.62	194.7	16.5065	-1.19	1.4161	-1.68516	-0.536102	3.60088	5.41371	5.74255	39.2725	8.27595
2018-10-03 06:00:00	1.05702	-0.909501	-1.91014	-1.16073	-3.12244	-0.621101	629.13	194.7	11.9325	-1.68	2.8224	-4.74163	-0.252502	3.42683	5.3277	5.66762	39.2825	8.2762
2018-10-04 06:00:00	0.944465	-1.1094	-2.11604	-1.34771	-3.31643	-0.748627	628.19	194.7	12.3415	-2.62	6.8644	-17.9847	-0.883804	2.98068	5.15613	5.54158	39.2925	8.27646
2018-10-05 06:00:00	0.841699	-1.29682	-2.32193	-1.5274	-3.50777	-0.869069	627.43	194.7	15.8585	-3.38	11.4244	-38.6145	-1.94471	2.53717	4.99102	5.41968	39.3025	8.27671
2018-10-06 06:00:00	0.751168	-1.45674	-2.50303	-1.71681	-3.70176	-1.00132	626.55	194.7	12.7425	-4.26	18.1476	-77.3088	-1.5182	2.21315	4.90901	5.33877	39.3125	8.27697
2018-10-07 06:00:00	0.636168	-1.66414	-2.71389	-1.92078	-3.88778	-1.11468	625.8	194.72	14.291	-5.01	25.1001	-125.752	-1.4128	1.70365	4.7669	5.24518	39.3225	8.27722
2018-10-08 06:00:00	0.687551	-1.54919	-2.48566	-1.69981	-3.75225	-1.05091	626.96	194.75	14.583	-3.85	14.8225	-57.0666	-1.8559	1.29267	4.65354	5.16039	39.3325	8.27748
2018-10-09 06:00:00	0.650849	-1.57918	-2.47574	-1.68524	-3.74693	-1.07453	627.7	194.7	17.687	-3.11	9.6721	-30.0802	-1.3258	1.04508	4.52427	5.0871	39.3425	8.27773
2018-10-10 06:00:00	0.621487	-1.65164	-2.60225	-1.82851	-3.84791	-1.13593	627.38	194.7	17.791	-3.43	11.7649	-40.3536	-0.256698	0.876276	4.46104	5.03657	39.3525	8.27798
2018-10-11 06:00:00	0.954252	-1.07942	-1.96471	-1.21901	-3.35364	-0.784051	626.99	194.7	13.292	-3.82	14.5924	-55.743	0.1298	0.688926	4.40541	4.98508	39.3625	8.27824
2018-10-12 06:00:00	1.25276	-0.614642	-1.21058	-0.473518	-2.85405	-0.420365	627.61	194.7	10.638	-3.2	10.24	-32.768	0.239701	0.2671	4.26932	4.88211	39.3725	8.27849
2018-10-13 06:00:00	1.35553	-0.489702	-0.964992	-0.237973	-2.7132	-0.321178	627.33	194.7	10.7505	-3.48	12.1104	-42.1442	-0.490897	-0.20085	4.09078	4.76971	39.3825	8.27875
2018-10-14 06:00:00	1.36531	-0.477208	-0.930262	-0.196692	-2.68929	-0.321178	627.31	194.7	14.0105	-3.5	12.25	-42.875	-1.2574	-0.7267	3.88698	4.66228	39.3925	8.279
2018-10-15 06:00:00	1.48031	-0.259813	-0.595368	0.133556	-2.45544	-0.160589	626.99	194.7	14.4105	-3.82	14.5924	-55.743	-1.9927	-0.911926	3.74529	4.58712	39.4025	8.27925
2018-10-16 06:00:00	1.5635	-0.13987	-0.377066	0.352103	-2.29865	-0.05904	627.36	194.7	15.5405	-3.45	11.9025	-41.0636	-2.6688	-0.955876	3.60953	4.5055	39.4125	8.27951
2018-10-17 06:00:00	1.64914	0.00506	-0.151323	0.565794	-2.15781	0.033062	627.76	194.7	13.377	-3.05	9.3025	-28.3726	-2.2191	-0.982076	3.51007	4.43435	39.4225	8.27976
2018-10-18 06:00:00	1.7984	0.229952	0.255512	0.976177	-1.89738	0.22199	628.14	194.7	11.627	-2.67	7.1289	-19.0342	-1.6713	-1.06765	3.34649	4.34756	39.4325	8.28001
2018-10-19 06:00:00	1.79106	0.21246	0.223263	0.951894	-1.92927	0.196013	628.3	194.7	12.676	-2.51	6.3001	-15.8133	-1.496	-1.24075	3.16798	4.24243	39.4425	8.28027
2018-10-20 06:00:00	1.9085	0.387376	0.518466	1.23601	-1.72199	0.358963	628.31	194.7	11.275	-2.5	6.25	-15.625	-1.7629	-1.48925	2.99978	4.15229	39.4525	8.28052
2018-10-21 06:00:00	1.95255	0.437352	0.630098	1.34771	-1.64759	0.39911	628.27	194.73	13.4655	-2.54	6.4516	-16.3871	-2.39	-1.6118	2.79183	4.052	39.4625	8.28077
2018-10-22 06:00:00	1.95255	0.434854	0.607772	1.33314	-1.64493	0.396749	628.04	194.7	14.5085	-2.77	7.6729	-21.2539	-2.805	-1.5493	2.66662	3.95928	39.4725	8.28103
